# Supplementary material for: Towards the targeted protein degradation of CK2: design and synthesis of CAM4066-based PROTACs
Source: publisher site journal article supplement (doi:10.3762/bjoc.22.47), 2026-04-22

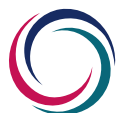

## Supporting Information

for

### **Towards the targeted protein degradation of CK2: design and synthesis of CAM4066-based PROTACs**

Sophie Day-Riley, Sona Krajcovicova, Aryaman Raj Sokhal, Jan L. Venne, Paul Brear, Marko Hyvönen, Benjamin C. Whitehurst, Jason S. Carroll and David R. Spring

*Beilstein J. Org. Chem.* **2026**, 22, 611–619. [doi:10.3762/bjoc.22.47](https://doi.org/10.3762/bjoc.22.47)

### **Experimental part and copies of NMR spectra**

## Table of contents

|                                                                                                              |     |
|--------------------------------------------------------------------------------------------------------------|-----|
| Table of contents .....                                                                                      | S1  |
| 1. Experimental procedures .....                                                                             | S2  |
| 1.1 General information .....                                                                                | S2  |
| 1.2 Instrumentation .....                                                                                    | S2  |
| 1.3 General procedures .....                                                                                 | S4  |
| 1.3.1 General procedure A: <i>tert</i> -butyloxycarbonyl (Boc) protection .....                              | S4  |
| 1.3.2 General procedure B: Boc-deprotection followed by HOBt/DIC amide coupling .....                        | S4  |
| 1.3.3 General procedure C: reductive amination .....                                                         | S5  |
| 1.3.4 General procedure D: one pot CuAAC “click” reaction, followed by Boc deprotection to the PROTACs ..... | S5  |
| 1.4 Experimental .....                                                                                       | S5  |
| 1.4.1 Synthesis of compound <b>4</b> .....                                                                   | S5  |
| 1.4.2 Synthesis of compound <b>5</b> .....                                                                   | S6  |
| 1.4.3 Synthesis of compound <b>6</b> .....                                                                   | S7  |
| 1.4.4 Synthesis of compound <b>S2</b> .....                                                                  | S7  |
| 1.4.5 Synthesis of compound <b>S3</b> (Boc-protected linker <b>7</b> ) .....                                 | S8  |
| 1.4.6 Synthesis of compound <b>11</b> .....                                                                  | S9  |
| 1.4.7 Synthesis of compound <b>S5</b> .....                                                                  | S9  |
| 1.4.8 Synthesis of compound <b>S6</b> (Boc-protected linker <b>8</b> ) .....                                 | S10 |
| 1.4.9 Synthesis of compound <b>12</b> .....                                                                  | S10 |
| 1.4.10 Synthesis of compound <b>S8</b> .....                                                                 | S11 |
| 1.4.11 Synthesis of compound <b>S9</b> (Boc-protected linker <b>9</b> ) .....                                | S12 |
| 1.4.12 Synthesis of compound <b>13</b> .....                                                                 | S12 |
| 1.4.13 Synthesis of compound <b>S11</b> (Boc-protected linker <b>10</b> ) .....                              | S13 |
| 1.4.14 Synthesis of compound <b>14</b> .....                                                                 | S14 |
| 1.4.15 Synthesis of compound <b>S12</b> .....                                                                | S15 |
| 1.4.16 Synthesis of $\alpha$ D binder aldehyde <b>16</b> .....                                               | S15 |
| 1.4.17 Synthesis of ligand–linker precursor <b>17</b> .....                                                  | S16 |
| 1.4.18 Synthesis of compound <b>S13</b> .....                                                                | S17 |
| 1.4.19 Synthesis of ligand–linker precursor <b>18</b> .....                                                  | S18 |
| 1.4.20 Synthesis of ligand–linker precursor <b>19</b> .....                                                  | S19 |
| 1.4.21 Synthesis of ligand–linker precursor <b>20</b> .....                                                  | S20 |
| 1.4.22 Synthesis of compound <b>S15</b> .....                                                                | S21 |
| 1.4.23 Synthesis of compound <b>S16</b> .....                                                                | S21 |
| 1.4.24 Synthesis of compound <b>S17</b> .....                                                                | S22 |
| 1.4.25 Synthesis of VHL Boc <b>21</b> .....                                                                  | S23 |
| 1.4.26 Synthesis of VHL azide <b>22</b> .....                                                                | S23 |
| 1.4.27 Synthesis of final VHL PROTAC <b>23</b> .....                                                         | S24 |
| 1.4.28 Synthesis of final VHL PROTAC <b>24</b> .....                                                         | S25 |
| 1.4.29 Synthesis of final VHL PROTAC <b>25</b> .....                                                         | S26 |
| 1.4.30 Synthesis of final VHL PROTAC <b>26</b> .....                                                         | S26 |
| 1.4.31 Synthesis of CK2 precursor <b>27</b> .....                                                            | S27 |
| 1.4.32 Synthesis of final CRBN PROTAC <b>28</b> .....                                                        | S28 |
| 1.4.33 Synthesis of final CRBN PROTAC <b>29</b> .....                                                        | S29 |
| 2. Biological and biophysical evaluation .....                                                               | S31 |
| 2.1 Isothermal titration calorimetry (ITC) .....                                                             | S31 |
| 2.2 Cell lines .....                                                                                         | S31 |
| 2.3 Cell culture .....                                                                                       | S31 |
| 2.4 Treatment with PROTACs .....                                                                             | S32 |
| 2.5 SDS-PAGE followed by Western blot .....                                                                  | S32 |
| 2.5.1 Lysate preparation .....                                                                               | S32 |
| 2.5.2 SDS-PAGE .....                                                                                         | S32 |
| 2.5.3 Western blot preparation .....                                                                         | S32 |
| 2.5.4 Western blot results .....                                                                             | S33 |
| 2.5.5 Uncropped Western blots .....                                                                          | S34 |
| 2.6 Sources of antibodies and reagents used .....                                                            | S37 |
| 3. References .....                                                                                          | S38 |
| 4. Copies of NMR spectra .....                                                                               | S39 |

# 1. Experimental procedures

## 1.1 General information

Room temperature (rt) refers to ambient temperature. Temperatures of  $-10\text{ }^{\circ}\text{C}$  were maintained using an acetone–ice bath. All temperatures below  $-10\text{ }^{\circ}\text{C}$  were maintained using an acetone–cardice bath. Temperatures of  $0\text{ }^{\circ}\text{C}$  were maintained using an ice–water bath. Reactions were carried out under a stream of nitrogen using oven-dried glassware unless otherwise stated. Heating was provided by conventional stirrer hotplates unless otherwise stated. Anhydrous solvents were stored as received from commercial suppliers. All other solvents and reagents were obtained from commercial suppliers and used without further purification from Sigma-Aldrich (US), Acros Organics (BE), or Fluorochem (UK). Software used: chemical structures (Chemdraw), NMR (MestReNova and TopSpin), Figures (created with BioRender or MS Powerpoint), citations (Zotero).

## 1.2 Instrumentation

**UV–LCMS analysis** was carried out using a Waters ACQUITY H-Class UPLC with an ESCi Multi-Mode Ionisation Waters SQ Detector 2 spectrometer using ACQUITY UPLC® CSH C18 (2.1 mm × 50 mm, 1.7  $\mu\text{M}$ , 130 Å) column at  $40\text{ }^{\circ}\text{C}$  and flow rate 0.6 mL/min. Mobile phase was (A) 2 mM ammonium acetate in water/MeCN 95:5, (B) MeCN and (C) 2% aq. formic acid, linearly programmed from 5–95% B over 5 min with constant 5% C over 1 min. The ESI source operated at a discharge current of 5  $\mu\text{A}$ , vaporiser temperature of  $350\text{ }^{\circ}\text{C}$  and capillary temperature of  $200\text{ }^{\circ}\text{C}$ . Chromatographs were monitored by UV absorbance using a photodiode array detector at a wavelength range of 210–800 nm, interval 1.2 nm.

**Preparative HPLC** was carried out on an Agilent 1260 Infinity using a Supelcosil ABZ+PLUS column (250 mm × 21.2 mm, 5  $\mu\text{M}$ ) eluting with a linear gradient system with mobile phases (A) 0.1% TFA in water (v/v) and (B) 0.05% TFA in MeCN (v/v) over 20 min at a flow rate of 20 mL/min.

**Mass-directed automatic purification (MDAP) HPLC** was carried out on a Waters AutoPurification mass-directed HPLC system with photodiode array detector, SQ Detector 2 and at-column dilution. The analytical runs used an X-Select CSH C18 column (4.6 × 150mm, 5  $\mu\text{M}$  particle size) and flow rate of 1.2 mL/min. The preparative runs used an X-Select CSH Prep C18 OBD column (19 × 150mm, 5  $\mu\text{M}$  particle size) and flow rate of 20 mL/min. The machine used a linear gradient of solvent B in solvent A run over 15 min with 1 min isocratic hold before the gradient (analytical) or over 15 min with 1.4 min isocratic hold (preparative). For acidic runs, solvent A was water with 0.1% (v/v) formic acid and solvent

B was MeCN with 0.1% (v/v) formic acid. For neutral runs solvent A was water (no additives) and solvent B was MeCN (no additives).

**Proton nuclear magnetic resonance (<sup>1</sup>H NMR) spectra** were recorded at ambient temperature (unless otherwise stated) on a Bruker DPX-400 (400 MHz), Bruker Avance 400 QNP (400 MHz), Bruker Avance 500 Cryo Ultrashield (500 MHz) or Bruker TXO Cryo Probe (700 MHz). <sup>1</sup>H NMR chemical shifts are reported in parts per million (ppm), to the nearest 0.01 ppm and are referenced to the residual non-deuterated solvent peak (CDCl<sub>3</sub>: 7.26, MeOD: 3.31, DMSO-*d*<sub>6</sub>: 2.50 ppm). Coupling constants (*J*) are reported in hertz (Hz) to the nearest 0.1 Hz. Data are reported as follows: chemical shift, multiplicity (app = apparent; s = singlet; d = doublet; t = triplet; q = quartet; qn = quintet; m = multiplet; or as a combination of these), coupling constant(s), integration, and assignment. Carbon NMR (<sup>13</sup>C NMR) spectra were recorded at ambient temperature on a Bruker DPX-400 (101 MHz), Bruker Avance 400 QNP (101 MHz), Bruker Avance 500 Cryo Ultrashield (126 MHz) or Bruker TXO Cryo Probe (176 MHz). Chemical shifts are quoted in ppm, to the nearest 0.1 ppm, and are referenced to the residual non-deuterated solvent peak (CDCl<sub>3</sub>: 77.2, MeOD: 49.0, DMSO-*d*<sub>6</sub>: 39.50 ppm). <sup>1</sup>H NMR and <sup>13</sup>C NMR spectra assignments were supported by DEPT-135, COSY, <sup>1</sup>H-<sup>13</sup>C HSQC, <sup>1</sup>H-<sup>13</sup>C HMBC, and NOESY where appropriate.

**Liquid chromatography mass spectrometry (LCMS)** was carried out using a Waters ACQUITY HClass UPLC with an ESCi Multi-Mode Ionisation Waters SQ Detector 2 spectrometer using MassLynx 4.1 software; ESI refers to the electrospray ionisation technique; LC system: solvent A: 2 mM NH<sub>4</sub>OAc in H<sub>2</sub>O/MeCN 95:5; solvent B: MeCN; solvent C: 2% formic acid (aq); column: ACQUITY UPLC CSH C18 (2.1 mm × 50 mm, 1.7 μm, 130 Å) at 40 °C; gradient: 5–95% B with constant 5% C, over 1 minute at a flow rate of 0.6 mL/minute; detector: PDA eλ Detector 220–800 nm, interval 1.2 nm.

**Infrared spectroscopy (IR)** was carried out using an Agilent Cary 630 FTIR. Major peaks are reported.

**High-resolution mass spectrometry (HRMS)** measurements were recorded with an Agilent 6230 LC/TOF HRMS system. Mass values are reported within the 5 ppm error limit.

**Thin layer chromatography (TLC)** was performed using pre-coated Merck glass backed silica gel 60 F254 plates and visualised by UV fluorescence ( $\lambda_{\text{max}} = 254 \text{ nm}$ ) or by staining with potassium permanganate. Retention factors (*R<sub>f</sub>*) are quoted to 0.01.

**Flash column chromatography** was carried out using Merck 9385 Kieselgel 60 SiO<sub>2</sub> (230–400 mesh) under a positive pressure of air unless otherwise stated. Automated flash column chromatography was carried out on a Combiflash Rf200 automated chromatography system with Redisep® reverse-phase

C18-silica flash columns (20–40  $\mu\text{m}$ ). Analytical high-performance liquid chromatography (HPLC) was carried out using an Agilent 1260 Infinity system with a reversed-phase Supelcosil™ ABZ+PLUS column (150 mm  $\times$  4.6 mm, 3  $\mu\text{m}$ ) eluting with a gradient system (solvent A: 0.05% (v/v) TFA in  $\text{H}_2\text{O}$ , solvent B: 0.05% (v/v) TFA in MeCN; 5% to 95% A to B) over 15 minutes, unless otherwise stated, at a flow rate of 1 mL/min. HPLC was monitored by UV absorbance at 220 and 254 nm. Mass-directed HPLC was carried out on a Waters Mass Directed Autopurification System using an SQD2 detector and XSelect® CSH (C18, 5  $\mu\text{M}$ , 19  $\times$  150 mm) column.

### 1.3 General procedures

#### 1.3.1 General procedure A: *tert*-butyloxycarbonyl (Boc) protection

To a stirring solution of the corresponding amine (1 equiv) in  $\text{CH}_2\text{Cl}_2$  at room temperature was added a solution of di-*tert*-butyl-dicarbonate (1.2 equiv) in  $\text{CH}_2\text{Cl}_2$ . The reaction mixture was stirred for 16 hours at room temperature. Upon completion (monitored by TLC  $\text{CH}_2\text{Cl}_2/\text{MeOH}$  10:1), the reaction mixture was concentrated in vacuo and the crude product was purified via silica gel flash column chromatography (5% MeOH in  $\text{CH}_2\text{Cl}_2$ ) to yield the desired product.

#### 1.3.2 General procedure B: Boc-deprotection followed by HOBt/DIC amide coupling

Boc-protected amine linker (1.2 equiv) was dissolved in a mixture of TFA/ $\text{CH}_2\text{Cl}_2$  1:1 (v/v) at 0 °C. The reaction mixture was stirred for 1 hour after which LC–MS confirmed removal of the Boc protecting group. The residual solvents were evaporated under a stream of nitrogen, the crude amine linker-TFA salt was redissolved in DMF (2.5 mL), and DIPEA (4.0 equiv) was added. To a solution of **6** (1.0 equiv) in DMF (2.5 mL) HOBt (1.3 equiv) was added at room temperature and the mixture was stirred for 10 min before DIC (1.3 equiv) was added. The reaction mixture was stirred for a further 10 min before the solution of the amine was added dropwise. The reaction mixture was left to stir for 16 hours at room temperature. The mixture was quenched with 10% aqueous citric acid solution (5 mL) and extracted with EtOAc (3  $\times$  5 mL). Organic extracts were combined, dried over  $\text{MgSO}_4$ , filtered, and concentrated in vacuo. The crude product was purified by reversed phase column chromatography (C<sub>18</sub> silica gel, 10–100% solvent B in solvent A. Solvent A: 5% formic acid solution (aq). Solvent B: MeCN) to yield the desired product.

### 1.3.3 General procedure C: reductive amination

Boc-protected amine (1 equiv) was dissolved in a mixture of TFA/CH<sub>2</sub>Cl<sub>2</sub> 1:1 (v/v) at 0 °C. The reaction mixture was stirred for 1 hour at room temperature, after which LC–MS confirmed removal of the Boc protecting group. The residual solvents were evaporated under stream of nitrogen, the residue was redissolved in methanol (5 mL) and the pH was adjusted to 7 using DIPEA. Then, aldehyde **16** (1.2 equiv) was added, and the reaction mixture was stirred at room temperature for 16 hours. After that, NaBH<sub>4</sub> (1.2 equiv) was added, and the reaction mixture was stirred for another hour after which LC–MS confirmed formation of desired product. Following evaporation of residual solvents and purification by reversed phase column chromatography (C<sub>18</sub> silica gel, 10-100% solvent B in solvent A. Solvent A: 0.1 M ammonia solution (aq). Solvent B: MeCN), the desired product was obtained.

### 1.3.4 General procedure D: one pot CuAAC “click” reaction, followed by Boc deprotection to the PROTACs

A stirring solution of the respective ligand–linker PROTAC precursors (1.0 equiv) and VHL-azide **22** (1.0 equiv) in MeCN/H<sub>2</sub>O 5:1 (v/v, 1 mL) was degassed with a stream of N<sub>2</sub> for 15 min. Tris(3-hydroxypropyltriazolylmethyl)amine (THPTA; 2.0 equiv) and sodium ascorbate (6.0 equiv) were added, followed by Cu<sub>2</sub>SO<sub>4</sub>·5H<sub>2</sub>O (2.0 equiv) and the reaction was stirred at room temperature for 7–16 hours, after which LC–MS confirmed formation of desired product. The reaction was concentrated in vacuo. The residue was dissolved in TFA/CH<sub>2</sub>Cl<sub>2</sub> 1:1 (v:v) and stirred at room temperature for 2 hours after which LC–MS confirmed formation of the Boc-deprotected products. The reaction was concentrated in vacuo and purified via the reversed phase HPLC to yield the desired VHL-PROTAC.

## 1.4 Experimental

### 1.4.1 Synthesis of compound 4

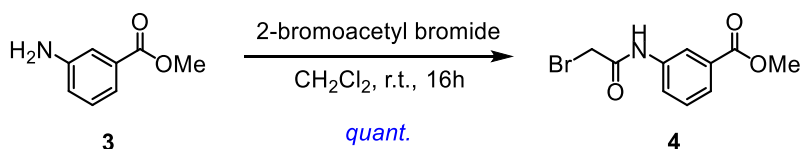

To a stirring solution of methyl 3-aminobenzoate (**3**, 3 g, 20 mmol, 1.0 equiv) in CH<sub>2</sub>Cl<sub>2</sub> (15 mL) at 0 °C was added 2-bromoacetyl bromide (1.7 mL, 20 mmol, 1.0 equiv) dropwise. The mixture was allowed to stir for 1 hour at 0 °C then at room temperature for 16 hours. Upon completion (monitored by TLC, 5% MeOH/CH<sub>2</sub>Cl<sub>2</sub>), the reaction mixture was diluted with CH<sub>2</sub>Cl<sub>2</sub> (150 mL) and extracted with aqueous 3 M

NH<sub>4</sub>Cl solution (3 × 150 mL). The organic layers were combined, dried over MgSO<sub>4</sub>, filtered, and concentrated in vacuo to yield the title compound **4** as a brown oil (5.4 g, 20 mmol, quant.) with no need for further purification.

R<sub>f</sub>: 0.71 (5% MeOH/ CH<sub>2</sub>Cl<sub>2</sub>)

LC-MS (ESI): [M-H]<sup>-</sup> calc. for [C<sub>10</sub>H<sub>9</sub>BrNO<sub>3</sub>]: 271.0, found 270.0

<sup>1</sup>H NMR (500 MHz, CDCl<sub>3</sub>): δ 8.24 (s, 1H), 8.06–8.05 (m, 1H), 7.91–7.89 (m, 1H), 7.84–7.82 (m, 1H), 7.45–7.42 (m, 1H), 4.04 (s, 2H), 3.93 (s, 3H) ppm

<sup>13</sup>C NMR (126 MHz, CDCl<sub>3</sub>): δ 166.5, 163.7, 137.2, 131.0, 129.3, 126.2, 124.4, 120.9, 52.4, 29.3 ppm

Note: Data were in accordance with those reported previously in literature.[1] CH<sub>2</sub>Cl<sub>2</sub>, used as a transferring agent, present in <sup>1</sup>H NMR at 5.30 (s) ppm and <sup>13</sup>C NMR at 53.46 ppm.

### 1.4.2 Synthesis of compound 5

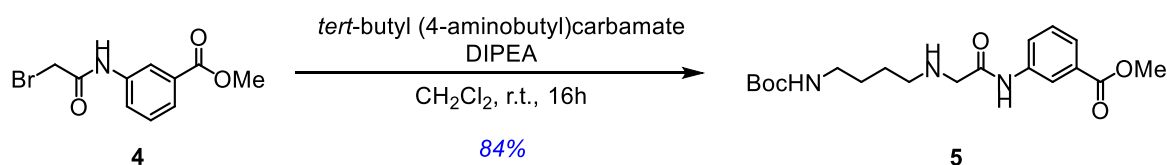

To a stirring solution of **4** (4.2 g, 15 mmol, 1.0 equiv) in CH<sub>2</sub>Cl<sub>2</sub> (40 mL) were added *tert*-butyl (4-aminobutyl)carbamate (3.8 mL, 20 mmol, 1.3 equiv) and DIPEA (3.9 mL, 22 mmol, 1.5 equiv). The mixture was stirred at room temperature for 16 hours. Upon completion (monitored by TLC, 5% MeOH in CH<sub>2</sub>Cl<sub>2</sub>) the reaction mixture was diluted with CH<sub>2</sub>Cl<sub>2</sub> (60 mL) and extracted with saturated aqueous NaHCO<sub>3</sub> solution (3 × 100 mL), dried over MgSO<sub>4</sub>, filtered, and concentrated in vacuo. The crude residue was purified by reversed phase column chromatography (C<sub>18</sub> silica gel, 10- 90% solvent B in solvent A; Solvent A: 0.5% formic acid (aq). Solvent B: MeCN) to afford the title compound **5** as a brown oil (4.8 g, 13 mmol, 84%).

R<sub>f</sub>: 0.28 (5% MeOH in CH<sub>2</sub>Cl<sub>2</sub>)

HRMS (ESI): [M+H]<sup>+</sup> calc. for C<sub>19</sub>H<sub>30</sub>O<sub>5</sub>N<sub>3</sub><sup>+</sup>: 380.2180, found 380.2165.

ν<sub>max</sub> (neat)/cm<sup>-1</sup>: 3323 (m, N-H), 2932 (m, C-H), 2110 (w, alkyne), 1683 (s, C=O), 1593 (m, C=C), 1524 (m, C=C), 1440 (s, C-H), 1365 (s, C-H), 1287 (m, N-H), 1247 (m, C-O), 1166 (s, C-O), 757 (s, C-H).

<sup>1</sup>H NMR (500 MHz, CDCl<sub>3</sub>): δ 8.06–8.05 (m, 1H), 8.00–7.98 (m, 1H), 7.78–7.76 (m, 1H), 7.42–7.38 (m, 1H), 3.91 (s, 3H), 3.39 (s, 2H), 3.16–3.15 (m, 2H), 2.72–2.69 (m, 2H), 1.57–1.55 (m, 4H), 1.43 (s, 9H) ppm.

$^{13}\text{C}$  NMR (126 MHz,  $\text{CDCl}_3$ ):  $\delta$  170.1, 166.7, 156.0, 137.8, 130.9, 129.2, 125.1, 123.9, 120.2, 79.2, 52.9, 52.2, 49.9, 40.3, 27.8, 27.2 ppm.

### 1.4.3 Synthesis of compound 6

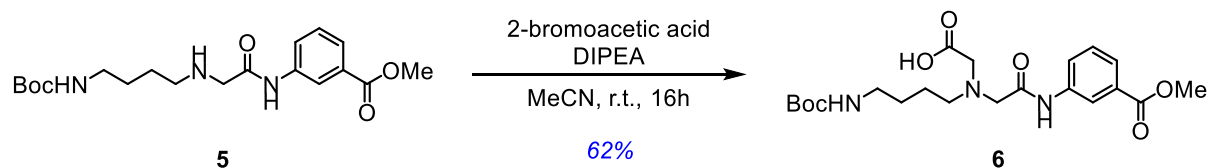

To a stirring solution of **5** (2.4 g, 6.3 mmol, 1.0 equiv) in acetonitrile (80 mL) was added DIPEA (1.4 mL, 8.0 mmol, 1.3 equiv). The mixture was stirred for 30 min at room temperature before 2-bromoacetic acid (1.2 g, 8.6 mmol, 1.4 equiv) was added and the reaction mixture was stirred at room temperature for 16 hours. Upon completion (monitored by TLC, 5% MeOH in  $\text{CH}_2\text{Cl}_2$ ), the mixture was concentrated in vacuo and purified by reverse phase column chromatography ( $\text{C}_{18}$  silica gel, 10–100% solvent B in solvent A. Solvent A: 5% formic acid solution (aq). Solvent B: MeCN over 20 min) to yield the title compound **6** as a white solid (1.70 g, 3.9 mmol, 62% yield).

$R_f$ : 0.20 (5% MeOH in  $\text{CH}_2\text{Cl}_2$ )

HRMS (ESI):  $[\text{M}+\text{H}]^+$  calc. for  $\text{C}_{21}\text{H}_{32}\text{N}_3\text{O}_7^+$ : 438.2235, found 438.2232

$\nu_{\text{max}}$  (neat)/ $\text{cm}^{-1}$ : 3386 (br, O-H), 2979 (C-H), 1696 (C=O), 1623 (C=C), 1597 (C=C), 1569 (C=C), 1445 (C-H), 1391 (C-H), 1367 (C-H), 1291 (N-H), 1287 (C-O), 1167 (C-O), 760 (C-H)

$^1\text{H}$  NMR (500 MHz,  $\text{CDCl}_3$ ):  $\delta$  8.16 (br s, 1H), 7.90–7.89 (m, 1H), 7.73–7.72 (m, 1H), 7.36–7.33 (m, 1H), 3.90 (s, 3H), 3.39 (s, 2H), 3.67 (s, 2H), 3.11 (s, 2H), 3.09–2.89 (m, 2H), 1.61–1.46 (m, 4H), 1.43 (s, 9H) ppm

$^{13}\text{C}$  NMR (126 MHz,  $\text{CDCl}_3$ ):  $\delta$  172.7, 168.2, 166.8, 156.2, 137.9, 130.7, 129.1, 125.3, 124.2, 120.5, 79.4, 58.6, 56.6, 55.6, 52.2, 39.9, 28.3, 27.4, 23.7 ppm

### 1.4.4 Synthesis of compound S2

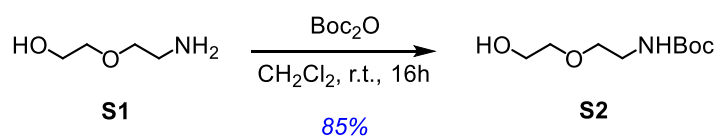

Prepared by *General Procedure A* with 2-(2-aminoethoxy)ethan-1-ol (**S1**, 0.50 g, 4.8 mmol, 1.0 equiv), di-*tert*-butyl dicarbonate (1.24 g, 5.7 mmol, 1.2 equiv) and  $\text{CH}_2\text{Cl}_2$  (12 mL). The crude product was

S7

purified by silica gel flash column chromatography (5% MeOH in CH<sub>2</sub>Cl<sub>2</sub>) to afford the title compound **S2** as a yellow oil (0.85 g, 4.1 mmol, 85%).

*R<sub>f</sub>*: 0.44 (5% MeOH in CH<sub>2</sub>Cl<sub>2</sub>).

$\nu_{\text{max}}$  (neat)/cm<sup>-1</sup>: 3675 (br, O-H), 3366 (w, N-H), 2973 (m, C-H), 2901 (m, C-H), 1687 (s, C=O).

<sup>1</sup>H NMR (700 MHz, CDCl<sub>3</sub>):  $\delta$  3.66 (t, *J* = 4.5, 2H, H), 3.50 (t, *J* = 4.5 Hz, 2H, H), 3.48 (t, *J* = 5.2 Hz, 2H, H), 3.25 (t, *J* = 4.8 Hz, 2H, H), 1.37 (s, 9H, H) ppm.

<sup>13</sup>C NMR (176 MHz, CDCl<sub>3</sub>):  $\delta$  156.2 (C<sup>3</sup>), 79.3 (C<sup>2</sup>), 72.2 (C<sup>6</sup>), 70.2 (C<sup>5</sup>), 61.4 (C<sup>7</sup>), 30.3 (C<sup>4</sup>), 28.3 (C<sup>1</sup>) ppm.

*Note: Data are in accordance with those reported previously in literature.[2]*

#### 1.4.5 Synthesis of compound **S3** (Boc-protected linker 7)

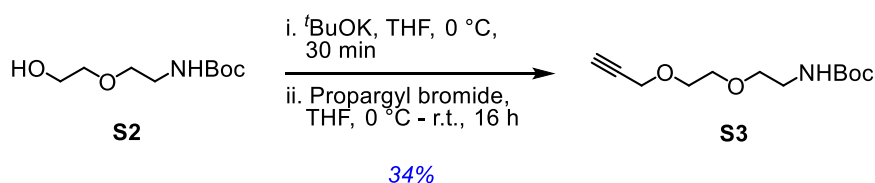

To a stirring solution of *tert*-butyl (2-(2-hydroxyethoxy)ethyl)carbamate (**S2**, 200 mg, 0.97 mmol, 1.0 equiv) in THF (6 mL) at 0 °C was added KO<sup>t</sup>Bu (168 mg, 1.50 mmol, 1.5 equiv). The solution was allowed to stir for 30 min before propargyl bromide (80% w/v, 104  $\mu$ L, 0.97 mmol, 1.0 equiv) was added, the solution was warmed to room temperature and stirred for 16 hours. Upon completion (monitored by TLC, 5% MeOH in CH<sub>2</sub>Cl<sub>2</sub>) the residual base was filtered off and residual solvents were evaporated. The crude mixture was purified by silica gel flash column chromatography (0 to 50% EtOAc in hexane) to afford the title compound **S3** as a yellow oil (80 mg, 0.33 mmol, 34%).

*R<sub>f</sub>*: 0.58 (5% MeOH in CH<sub>2</sub>Cl<sub>2</sub>)

<sup>1</sup>H NMR (500 MHz, CDCl<sub>3</sub>):  $\delta$  4.14 (d, *J* = 2.3, 2H), 3.64–3.57 (m, 4H), 3.48 (t, *J* = 5.2 Hz, 2H), 3.28 (t, *J* = 5.2 Hz, 2H), 2.40 (t, *J* = 2.4 Hz, 2H), 1.30 (s, 9H) ppm

<sup>13</sup>C NMR (126 MHz, CDCl<sub>3</sub>):  $\delta$  159.9, 79.5, 79.1, 74.6, 70.2, 70.0, 68.9, 58.3, 40.3, 28.3 ppm

*Note: Data are in accordance with those reported previously in literature.[2]*

### 1.4.6 Synthesis of compound 11

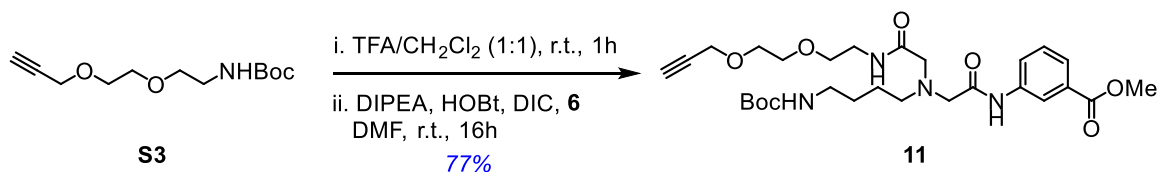

Prepared by *General Procedure B* with **6** (131 mg, 0.30 mmol, 1.0 equiv), **S3** (88 mg, 0.36 mmol, 1.2 equiv), HOBt (60 mg, 0.39 mmol, 1.3 equiv) and DIC (62  $\mu\text{L}$ , 0.40 mmol, 1.3 equiv). The crude reaction mixture was purified via reversed phase column chromatography ( $\text{C}_{18}$  silica gel, 10–100% solvent B in solvent A. Solvent A: 5% formic acid solution (aq). Solvent B: MeCN) to yield the desired product to yield the title compound **11** as a yellow oil (130 mg, 0.23 mmol, 77%).

$R_f$ : 0.21 (5% MeOH in  $\text{CH}_2\text{Cl}_2$ )

**HRMS** (ESI):  $[\text{M}+\text{H}]^+$  calc. for  $\text{C}_{28}\text{H}_{43}\text{N}_4\text{O}_8^+$ : 563.3081, found 563.3088

$\nu_{\text{max}}$  (neat)/ $\text{cm}^{-1}$ : 3283 (m N-H), 2930 (m, C-H), 2869 (m, C-H), 1714 (s, C=O), 1661 (s, C=C), 1593 (m, C=O), 1530 (m, C=C), 1440 (m, C-H), 1365 (m, C-H), 1287 (s, C-O), 1248 (C-N), 1165 (s, C-H)

**$^1\text{H NMR}$**  (500 MHz,  $\text{CDCl}_3$ ):  $\delta$  8.26–8.25 (m, 1H), 7.96–9.94 (m, 1H), 7.78–7.56 (m, 1H), 7.41–7.38 (m, 1H), 4.15 (d,  $J = 2.4$  Hz, 2H), 3.91 (s, 3H), 3.68–3.63 (m, 4H), 3.60–3.58 (m, 2H), 3.54–3.51 (m, 2H), 3.33 (s, 2H), 3.27 (s, 2H), 2.69–2.66 (m, 2H), 2.67 (t,  $J = 6.9$  Hz, 2H), 2.44 (t,  $J = 2.4$  Hz, 1H), 1.54–1.51 (m, 4H), 1.41 (s, 9H) ppm

**$^{13}\text{C NMR}$**  (126 MHz,  $\text{CDCl}_3$ ):  $\delta$  170.8, 169.7, 166.8, 156.2, 138.2, 130.8, 129.0, 125.2, 124.3, 120.7, 79.4, 79.3, 74.8, 69.9, 69.5, 69.0, 59.7, 58.9, 58.4, 55.4, 52.1, 39.9, 39.1, 28.4, 27.5, 24.1 ppm

### 1.4.7 Synthesis of compound S5

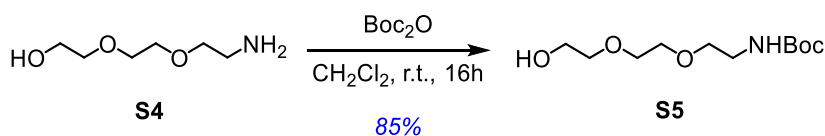

Prepared by *General Procedure A* with 2-(2-(2-aminoethoxy)ethoxy)ethan-1-ol (**S4**, 385 mg, 2.6 mmol, 1.0 equiv), di-*tert*-butyl dicarbonate (675 mg, 3.1 mmol, 1.2 equiv) and  $\text{CH}_2\text{Cl}_2$  (12 mL). The crude product was purified by silica gel flash column chromatography (5% MeOH in  $\text{CH}_2\text{Cl}_2$ ) to afford the title compound **S5** as a yellow oil (560 mg, 2.2 mmol, 8%).

$R_f$ : 0.40 (5% MeOH in  $\text{CH}_2\text{Cl}_2$ )

$\nu_{\max}$  (neat)/ $\text{cm}^{-1}$ : 3684 (br O-H), 3374 (w, N-H), 2987 (m, C-H), 2901 (m, C-H), 1240 (s, C-O), 1691 (C=O)

$^1\text{H NMR}$  (500 MHz,  $\text{CDCl}_3$ ):  $\delta$  3.73–3.71 (m, 2H), 3.65–3.58 (m, 6H), 3.53 (t,  $J = 5.2$  Hz, 2H), 3.29 (t,  $J = 5.1$  Hz, 2H), 1.42 (s, 9H) ppm

$^{13}\text{C NMR}$  (126 MHz,  $\text{CDCl}_3$ ):  $\delta$  156.0, 79.3, 72.6, 70.4, 70.3, 61.7, 40.4, 28.4 ppm

Note: Data are in accordance with those reported previously in literature.[3]

#### 1.4.8 Synthesis of compound S6 (Boc-protected linker 8)

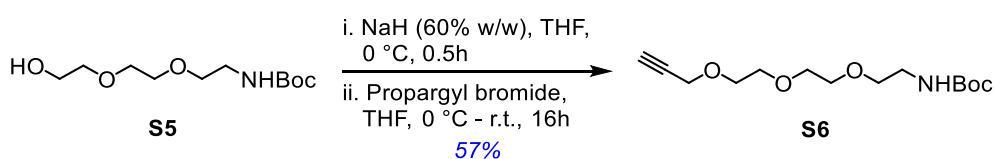

To a stirring solution of *tert*-butyl (2-(2-(2-hydroxyethoxy)ethoxy)ethyl)carbamate (**S5**, 100 mg, 0.40 mmol, 1.0 equiv) in THF (6 mL) at 0 °C was added NaH (60% w/w, 20 mg, 0.50 mmol, 1.3 equiv). The solution was allowed to stir for 30 min before propargyl bromide (80% w/v, 43  $\mu\text{L}$ , 0.40 mmol, 1.0 equiv) was added, the solution was warmed to room temperature and stirred for 16 hours. Upon completion (monitored by TLC  $\text{CH}_2\text{Cl}_2/\text{MeOH}$  10:1), the reaction mixture was diluted with saturated aqueous  $\text{NH}_4\text{Cl}$  solution (3 mL) and extracted with EtOAc (3  $\times$  3 mL). The organic layers were combined, dried over  $\text{MgSO}_4$ , filtered and concentrated in vacuo. The crude mixture was purified by silica gel flash column chromatography (0 to 50% EtOAc in hexane) to afford the title compound **S6** as a yellow oil (66 mg, 0.23 mmol, 57%).

$R_f$ : 0.47 (5% MeOH in  $\text{CH}_2\text{Cl}_2$ )

$^1\text{H NMR}$  (700 MHz,  $\text{CDCl}_3$ ):  $\delta$  4.15 (d,  $J = 2.4$  Hz, 2H), 3.70–3.65 (m, 4H), 3.63–3.59 (m, 4H), 3.56 (t,  $J = 5.1$  Hz, 2H), 3.48 (t,  $J = 5.2$  Hz, 2H), 3.24 (t,  $J = 4.7$  Hz, 2H), 2.40 (t,  $J = 2.3$  Hz, 1H), 1.38 (s, 9H) ppm

$^{13}\text{C NMR}$  (176 MHz,  $\text{CDCl}_3$ ):  $\delta$  156.0, 79.6, 79.2, 74.5, 70.5, 70.4, 70.2, 69.1, 58.3, 53.4, 40.4, 28.4 ppm

Note: Data are in accordance with those reported previously in literature.[3]

#### 1.4.9 Synthesis of compound 12

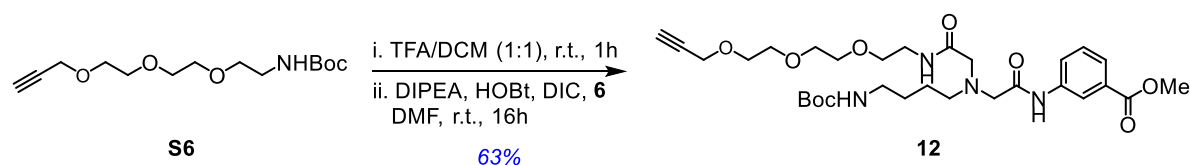

Prepared by *General Procedure B* with **6** (87 mg, 0.20 mmol, 1.0 equiv), **S6** (69 mg, 0.24 mmol, 1.2 equiv), HOBT (40 mg, 0.26 mmol, 1.3 equiv) and DIC (41  $\mu$ L, 0.26 mmol, 1.3 equiv). The crude product was purified by reversed phase column chromatography (C<sub>18</sub> silica gel, 10–100% solvent B in solvent A. Solvent A: 5% formic acid solution (aq). Solvent B: MeCN) to yield the title compound **12** as a yellow oil (76 mg, 0.13 mmol, 63%).

R<sub>f</sub>: 0.43 (5% MeOH in CH<sub>2</sub>Cl<sub>2</sub>)

HRMS (ESI): [M+H]<sup>+</sup> calc. for C<sub>30</sub>H<sub>47</sub>O<sub>9</sub>N<sub>4</sub><sup>+</sup>: 607.3338, found 607.3312

$\nu_{\max}$  (neat)/cm<sup>-1</sup>: 3298 (m, N-H), 2931(m, C-H), 2873 (m, C-H), 2090 (w, alkyne), 1712 (s, C=O), 1661 (s, C=C), 1593 (m, C=C), 1531 (s, C=C), 1440 (m, C-H), 1365 (m, C-H), 1287 (s, C-O), 1248 (s, C-N), 1165 (s, C-O), 1150 (s, C-O), 757 (s, C-H)

<sup>1</sup>H NMR (400 MHz, CDCl<sub>3</sub>):  $\delta$  8.27–8.26 (m, 1H), 7.95–7.93 (m, 1H), 7.70–7.74 (m, 1H), 7.40–7.36 (m, 1H), 4.16 (d, *J* = 2.4 Hz, 2H), 3.90 (s, 3H), 3.68–3.56 (m, 10H), 3.52–3.49 (m, 2H), 3.33 (s, 2H), 3.28 (s, 2H), 3.11–3.09 (m, 2H), 2.68–2.65 (m, 2H), 2.44 (t, *J* = 2.4 Hz, 1H), 1.53–1.50 (m, 4H), 1.41 (s, 9H) ppm

<sup>13</sup>C NMR (101 MHz, CDCl<sub>3</sub>):  $\delta$  170.9, 169.8, 166.8, 156.2, 138.3, 130.8, 128.9, 125.1, 124.3, 120.7, 79.3, 79.2, 74.9, 70.4, 70.2, 70.1, 69.5, 69.1, 59.7, 58.8, 58.3, 55.5, 52.1, 40.0, 39.1, 28.4, 27.5, 24.2 ppm

#### 1.4.10 Synthesis of compound **S8**

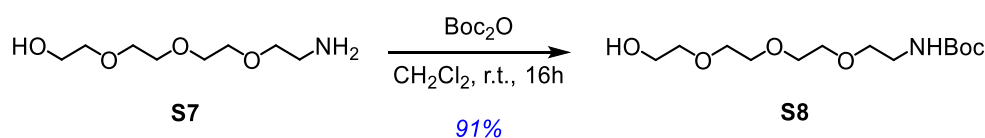

Prepared by *General Procedure A* with 2-(2-(2-(2-aminoethoxy)ethoxy)ethoxy)ethan-1-ol (**S7**, 500 mg, 2.6 mmol, 1.0 equiv), di-*tert*-butyl dicarbonate (675 mg, 3.1 mmol, 1.2 equiv) and CH<sub>2</sub>Cl<sub>2</sub> (12 mL). The crude product was purified by silica gel flash column chromatography (5% MeOH in CH<sub>2</sub>Cl<sub>2</sub>) to afford the title compound **S8** as a yellow oil (695 mg, 2.4 mmol, 91%).

R<sub>f</sub>: 0.33 (5% MeOH in CH<sub>2</sub>Cl<sub>2</sub>)

<sup>1</sup>H NMR (500 MHz, CDCl<sub>3</sub>):  $\delta$  3.73–3.68 (m, 4H), 3.66–3.59 (m, 8H), 3.52 (t, *J* = 5.1 Hz, 2H), 3.30 (t, *J* = 5.1 Hz, 2H), 1.30 (s, 9H) ppm

<sup>13</sup>C NMR (126 MHz, CDCl<sub>3</sub>):  $\delta$  156.2, 79.1, 72.6, 70.6, 70.5, 70.4, 70.2, 70.1, 61.6, 40.5, 28.4 ppm

*Note: Data are in accordance with those reported previously in literature.[4]*

### 1.4.11 Synthesis of compound **S9** (Boc-protected linker 9)

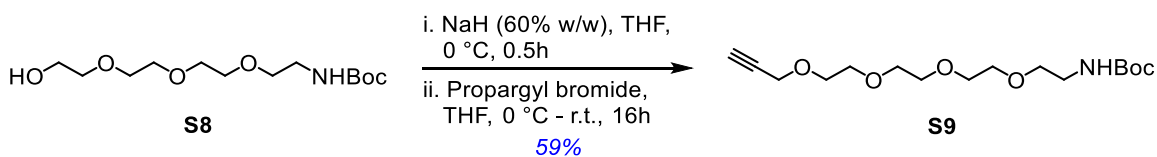

To a stirring solution of *tert*-butyl (2-(2-(2-(2-hydroxyethoxy)ethoxy)ethoxy)ethyl) carbamate (**S8**, 100 mg, 0.34 mmol, 1.0 equiv) in THF (6 mL) at 0 °C was added NaH (60% w/w, 20 mg, 0.51 mmol, 1.5 equiv). The solution was allowed to stir for 30 minutes before propargyl bromide (80% w/v, 36  $\mu$ L, 0.34 mmol, 1.0 equiv) was added, the solution was warmed to room temperature and stirred for 16 hours. Upon completion (monitored by TLC CH<sub>2</sub>Cl<sub>2</sub>/MeOH 10:1) the reaction mixture was diluted with saturated aqueous NH<sub>4</sub>Cl solution (10 mL) and extracted with EtOAc (3  $\times$  10 mL). The organic layers were combined, dried over MgSO<sub>4</sub>, filtered and concentrated in vacuo. The crude mixture was purified by silica gel flash column chromatography (0 to 50% EtOAc in hexane) to afford the title compound **S9** as a yellow oil (67 mg, 0.20 mmol, 59%).

R<sub>f</sub>: 0.56 (5% MeOH in CH<sub>2</sub>Cl<sub>2</sub>)

<sup>1</sup>H NMR (500 MHz, CDCl<sub>3</sub>):  $\delta$  4.20 (d, *J* = 2.4 Hz, 2H), 3.72–3.59 (m, 14H), 3.49 (t, *J* = 5.4 Hz, 2H), 2.42 (t, *J* = 2.4 Hz, 1H), 1.46 (s, 9H) ppm

<sup>13</sup>C NMR (126 MHz, CDCl<sub>3</sub>):  $\delta$  156.0, 79.6, 79.1, 74.6, 70.5, 70.3, 70.2, 70.1, 69.0, 58.4, 40.3, 28.4 ppm

Note: Data are in accordance with those reported previously in literature.[4]

### 1.4.12 Synthesis of compound **13**

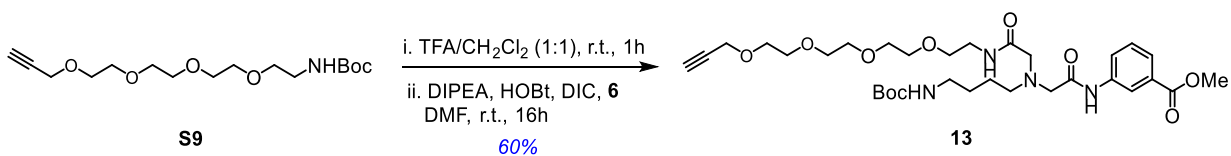

Prepared by *General Procedure B* with **6** (87 mg, 0.20 mmol, 1.0 equiv), **S9** (80 mg, 0.24 mmol, 1.2 equiv), HOBT (40 mg, 0.26 mmol) and DIC (41  $\mu$ L, 0.26 mmol). The crude product was purified by reversed phase column chromatography (C<sub>18</sub> silica gel, 10–100% solvent B in solvent A. Solvent A: 5% formic acid solution (aq). Solvent B: MeCN) to yield the title compound **13** as a yellow oil (79 mg, 0.12 mmol, 60%).

R<sub>f</sub>: 0.48 (5% MeOH in CH<sub>2</sub>Cl<sub>2</sub>).

HRMS (ESI): [M+H]<sup>+</sup> calc. for C<sub>32</sub>H<sub>51</sub>N<sub>4</sub>O<sub>10</sub><sup>+</sup>: 561.3600, found 651.3577

$\nu_{\max}$  (neat)/ $\text{cm}^{-1}$ : 3290 (m, N-H), 2869 (m, C-H), 2865 (m, C-H), 2115 (w, alkyne), 1712 (s, C=O), 1663 (s, C=C), 1593 (m, C=C), 1531 (s, C=C), 1440 (m, C-H), 1288 (s, C-O), 1248 (m, C-N), 1166 (s, C-O), 1150 (s, C-O), 757 (s, C-H).

$^1\text{H NMR}$  (400 MHz,  $\text{CDCl}_3$ ):  $\delta$  8.29–8.28 (m, 1H), 7.96–7.94 (m, 1H), 7.77–7.75 (m, 1H), 7.40–7.37 (m, 1H), 4.17 (d,  $J = 2.4$  Hz, 2H), 3.90 (s, 3H), 3.70–3.56 (m, 14H), 3.53–3.50 (m, 2H), 3.34 (s, 2H), 3.30 (s, 2H), 3.11–3.10 (m, 2H), 2.70–2.67 (m, 2H), 2.44 (t,  $J = 2.4$  Hz, 1H), 1.54–1.52 (m, 4H), 1.42 (s, 9H) ppm

$^{13}\text{C NMR}$  (101 MHz,  $\text{CDCl}_3$ ):  $\delta$  171.1, 170.0, 166.9, 156.2, 138.3, 130.7, 128.9, 125.1, 124.3, 120.7, 79.3, 79.2, 74.8, 70.4, 70.4, 70.3, 70.2, 70.0, 69.6, 69.0, 59.7, 58.8, 58.3, 55.6, 52.1, 40.0, 39.2, 28.4, 28.4, 24.5 ppm

#### 1.4.13 Synthesis of compound S11 (Boc-protected linker 10)

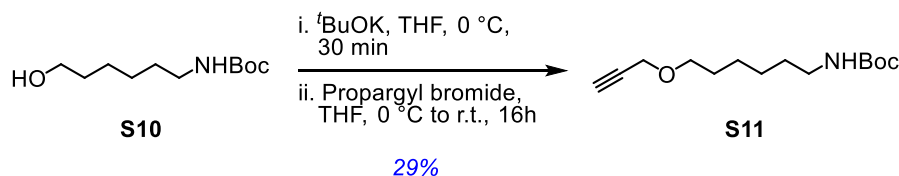

To a stirring solution of *tert*-butyl (6-hydroxyhexyl)carbamate (**S10**, 2.0 g, 9.2 mmol, 1.0 equiv) in THF (60 mL) at 0 °C was added  $\text{KO}t\text{-Bu}$  (1.5 g, 13.4 mmol, 1.5 equiv). The solution was allowed to stir for 30 min before propargyl bromide (80% w/v, 1.0 mL, 9.2 mmol, 1.0 equiv) was added, the solution was warmed to room temperature and stirred for 16 hours. Upon completion (monitored by TLC  $\text{CH}_2\text{Cl}_2/\text{MeOH}$  10:1) was the residual base filtered off and residual solvents were evaporated. The crude mixture was purified by silica gel flash column chromatography (0 to 50% EtOAc in hexane) to afford the title compound **S11** as a yellow oil (680 mg, 2.7 mmol, 29%).

$R_f$ : 0.33 (5% MeOH in  $\text{CH}_2\text{Cl}_2$ )

$\nu_{\max}$  (neat)/ $\text{cm}^{-1}$ : 3307 (m, N-H), 2934 (s, C-H), 2858 (s, C-H), 2115 (w, alkyne), 1692 (s, C=O), 1365 (C-H), 1248 (C-O)

$^1\text{H NMR}$  (500 MHz,  $\text{CDCl}_3$ ):  $\delta$  4.11 (d,  $J = 2.5$  Hz, 2H), 3.49 (t,  $J = 6.5$  Hz, 2H), 3.08, (t  $J = 7.5$  Hz), 2.40 (t,  $J = 2.4$  Hz, 1H), 1.60–1.55 (m, 2H), 1.49–1.35 (m, 2H), 1.42 (s, 9H), 1.38–1.29 (m, 4H) ppm

$^{13}\text{C NMR}$  (126 MHz,  $\text{CDCl}_3$ ):  $\delta$  156.0, 80.0, 79.0, 74.1, 70.0, 58.0, 40.5, 30.0, 29.3, 28.4, 26.5, 25.7 ppm

Note: Residual EtOAc was presented in  $^1\text{H NMR}$  at 4.11 (q) (overlapping with 4.11 (d)), 2.02 (s) and 1.24 (t) ppm and in  $^{13}\text{C NMR}$  at 171.1, 60.3, 21.0, 14.2 ppm; residual  $\text{CH}_2\text{Cl}_2$  (transferring solvent) was presented in  $^1\text{H NMR}$  at 5.28 (s) ppm and  $^{13}\text{C NMR}$  at 53.4 ppm.

#### 1.4.14 Synthesis of compound 14

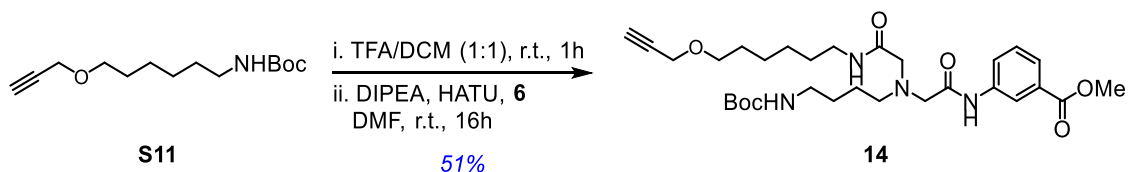

*tert*-Butyl (6-(prop-2-yn-1-yloxy)hexyl)carbamate (**S11**, 200 mg, 0.78 mmol, 1.0 equiv) was dissolved in a mixture of TFA/CH<sub>2</sub>Cl<sub>2</sub> 1:1 (v/v, 4 mL) at 0 °C and stirred at room temperature for 1 hour. Upon completion (monitored by TLC, 5% MeOH in CH<sub>2</sub>Cl<sub>2</sub>) residual solvents were evaporated under stream of nitrogen, the residue was redissolved in DMF (5 mL) and the pH was adjusted to 7 using DIPEA. HATU (355 mg, 0.93 mmol, 1.2 equiv), DIPEA (289 μL, 1.68 mmol, 2.1 equiv) and **6** (348 mg, 0.80 mmol, 1.0 equiv) were added and the reaction mixture was stirred at room temperature for 16 hours. Upon completion (monitored by TLC, CH<sub>2</sub>Cl<sub>2</sub>/MeOH 10:1), the reaction mixture was diluted with CH<sub>2</sub>Cl<sub>2</sub> (5 mL) and extracted with 10% w/v aqueous citric acid solution (3 × 3 mL), 0.3 M aqueous lithium chloride solution (3 × 3 mL) and brine (2 × 3 mL). The organic layer was combined, dried over MgSO<sub>4</sub>, filtered and concentrated in vacuo. The crude product was purified by flash column chromatography (5% MeOH in CH<sub>2</sub>Cl<sub>2</sub>) to yield the title compound **14** as a yellow oil (229 mg, 0.40 mmol, 51% yield\*).

**R<sub>f</sub>**: 0.20 (5% MeOH in CH<sub>2</sub>Cl<sub>2</sub>)

**HRMS** (ESI): [M+H]<sup>+</sup> calc. for C<sub>30</sub>H<sub>47</sub>O<sub>7</sub>N<sub>4</sub><sup>+</sup>: 575.3439, found 575.3424

**v<sub>max</sub>** (neat)/cm<sup>-1</sup>: 3289 (m, N-H), 2933 (m, C-H), 2860 (m, C-H), 2120 (w, alkyne), 1700 (s, C=O), 1660 (s, C=C), 1593 (m, C=C), 1530 (s, C=C), 1437 (m, C-H), 1365 (m, C-H) 1287 (m, C-O), 1248 (m, C-N), 1165 (w, C-O), 760 (s, C-H)

**<sup>1</sup>H NMR** (500 MHz, CDCl<sub>3</sub>): δ 8.28–8.27 (m, 1H), 7.91–7.89 (m, 1H), 7.79–7.77 (m, 1H), 7.40–7.37 (m, 1H), 4.12 (d, *J* = 2.4 Hz, 2H), 3.90 (s, 3H), 3.52–3.49 (m, 2H) **or** 3.53–3.50 (m, 2H), 3.32–3.28 (m, 2H) **or** 3.20–3.17 (m, 2H), 3.14–3.10 (m, 2H), 2.88 (s, 2H), 2.80 (s, 2H), 2.42 (t, *J* = 2.4 Hz, 1H), 1.70–1.52 (m, 16H), 1.41 (s, 9H), 1.38–1.34 (m, 6H) ppm

*\*Note: Reported yield higher than actual. Residual DMF from the reaction is presented in <sup>1</sup>H NMR at 8.02 (s), 2.96 (s) and 2.88 (s) ppm. The unreacted linker 10 is present in the <sup>1</sup>H NMR at 4.11 (d, CH<sub>2</sub>-alkyne), 3.52–3.49 (m, CH<sub>2</sub>-) **or** 3.53-3.50 (m, CH<sub>2</sub>-), 3.32–3.28 (m, -CH<sub>2</sub>-) **or** 3.20-3.17 (m, 2H, -CH<sub>2</sub>), 2.41 (t, alkyne) 1.70-1.52 (m, -CH<sub>2</sub>-) and 1.38-1.34 (m, -CH<sub>2</sub>-). Route was abandoned following difficulties with purification.*

#### 1.4.15 Synthesis of compound S12

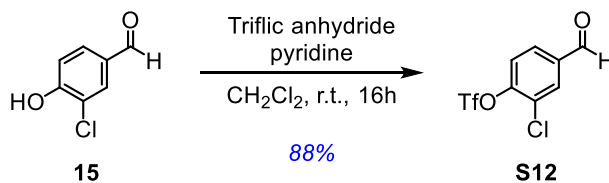

To a stirring solution of 3-chloro-4-hydroxybenzaldehyde (**15**, 2.0 g, 13 mmol, 1.0 equiv) in anhydrous CH<sub>2</sub>Cl<sub>2</sub> (100 mL) under nitrogen at 0 °C was added pyridine (1.7 mL, 21 mmol, 1.6 equiv). Trifluoromethanesulfonic anhydride (2.8 mL, 16 mmol, 1.2 equiv) was added dropwise over a period of 30 minutes. The solution was stirred at room temperature for 16 hours and upon completion (monitored by TLC, 20% EtOAc in hexane) was cooled down to 0 °C, quenched with ice water and basified to pH 8 with saturated NaHCO<sub>3</sub> solution. The organic layer was separated, and the aqueous layer was washed with CH<sub>2</sub>Cl<sub>2</sub> (3 × 100 mL). The organic layers were combined, washed with brine (100 mL), and dried over MgSO<sub>4</sub> before being concentrated in vacuo to afford the title compound **S12** as a brown oil (3.3 g, 11 mmol, 88%) without further purification.

R<sub>f</sub>: 0.42 (20% EtOAc in hexane)

LRMS (ESI): [M+H]<sup>+</sup> calc. for C<sub>8</sub>H<sub>5</sub>ClF<sub>3</sub>O<sub>4</sub>S<sup>+</sup>: 288.6, found 288.4

<sup>1</sup>H NMR (500 MHz, CDCl<sub>3</sub>): δ 10.00 (s, 1H), 8.05 (d, *J* = 2.0 Hz, 1H), 7.88 (dd, *J* = 8.4, 2.0 Hz, 1H), 7.56 (d, *J* = 8.5 Hz, 1H) ppm

<sup>13</sup>C NMR (126 MHz, CDCl<sub>3</sub>): δ 188.9, 149.3, 136.5, 132.0, 129.4, 128.7, 123.8, 118.5 (q, <sup>1</sup>J<sub>C-F</sub> = 320.7 Hz) ppm

<sup>19</sup>F NMR (376 MHz, CDCl<sub>3</sub>): δ -78.91 (s) ppm

Note: 10 μL trifluoroacetic acid used as <sup>19</sup>F NMR standard (75.55 (s)). Data were in accordance with those reported previously in literature.[5]

#### 1.4.16 Synthesis of αD binder aldehyde 16

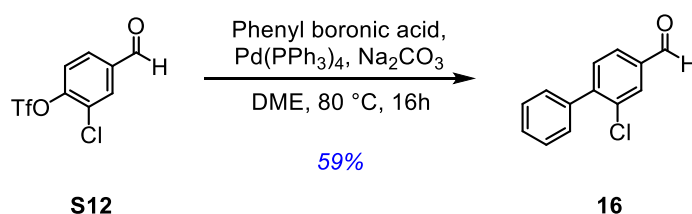

To a stirring solution of 2-chloro-4-formylphenyl trifluoromethanesulfonate (**S12**, 3.3 g, 11 mmol, 1.0 equiv) in 1,2-dimethoxyethane (70 mL) were added phenylboronic acid (1.7 g, 14 mmol, 1.3 equiv) and Na<sub>2</sub>CO<sub>3</sub> (3.5 g, 33 mmol, 3.0 equiv). The solution was degassed for 30 minutes under a stream of

N<sub>2</sub> before Pd(PPh<sub>3</sub>)<sub>4</sub> (64 mg) was added and heated to reflux for 16 hours. The reaction mixture was cooled to room temperature, quenched with water (30 mL), and extracted with EtOAc (3 × 50 mL). The organic layers were combined, dried over MgSO<sub>4</sub>, filtered, and concentrated in vacuo. The residue was purified by silica gel column chromatography (10% EtOAc in PE 40–60) to yield the title compound **16** as a white solid (1.4 g, 6.5 mmol, 59%).

R<sub>f</sub>: 0.33 (10% EtOAc in PE 40-60)

HRMS (ESI): [M+H]<sup>+</sup> calc. for C<sub>13</sub>H<sub>10</sub>OCl<sup>+</sup>: 217.0415, found 217.0407

<sup>1</sup>H NMR (500 MHz, CDCl<sub>3</sub>): δ 10.00 (s, 1H), 7.99 (d, *J* = 1.6 Hz, 1H), 7.83 (dd, *J* = 7.8, 1.6 Hz, 1H), 7.53 (d, *J* = 7.8 Hz, 1H), 7.48–7.42 (m, 5H) ppm

<sup>13</sup>C NMR (126 MHz, CDCl<sub>3</sub>): δ 190.6, 146.4, 138.2, 136.4, 133.7, 132.1, 131.1, 129.2, 128.4, 128.2, 127.8 ppm

Note: Data were in accordance with those reported previously in literature.[6]

#### 1.4.17 Synthesis of ligand–linker precursor **17**

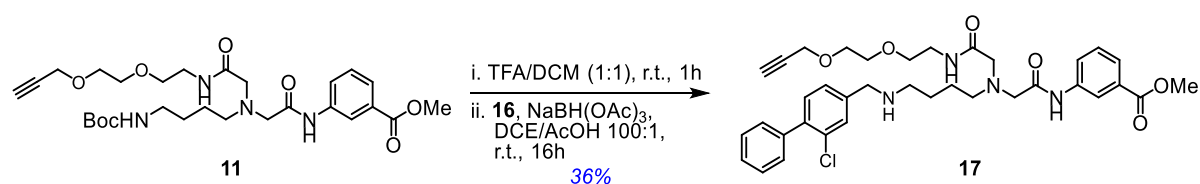

Methyl 3-(3-(4-((*tert*-butoxycarbonyl)amino)butyl)-5-oxo-9,12-dioxo-3,6-diazapentadec-14-ynamido)benzoate (**11**, 28 mg, 50 μmol, 1.0 equiv) was dissolved in a mixture of TFA/CH<sub>2</sub>Cl<sub>2</sub> 1:1 (v/v, 0.6 mL) at 0 °C for 1 hour. Upon completion (monitored by TLC, 5% MeOH in CH<sub>2</sub>Cl<sub>2</sub>), the residual solvents were evaporated under stream of nitrogen, the residue was redissolved in DCE (1 mL) and adjusted to pH 7 with DIPEA. A solution of **16** (14 mg, 64 μmol, 1.3 equiv) in DCE (1 mL) and acetic acid (10 μL) was stirred for 10 minutes at room temperature before the amine solution was added. The mixture was stirred for 2 hours, before NaBH(OAc)<sub>3</sub> (32 mg, 150 μmol, 3.0 equiv) was added in two portions over 30 minutes. The mixture was stirred for additional 16 hours. Upon completion (monitored by TLC, 5% MeOH in CH<sub>2</sub>Cl<sub>2</sub>) the reaction mixture was diluted with CH<sub>2</sub>Cl<sub>2</sub> (5 mL) and extracted with 2 M aqueous NaHCO<sub>3</sub> solution (3 × 3 mL). The organic layers were combined, dried over MgSO<sub>4</sub>, filtered and concentrated in vacuo. The crude product was purified by reversed phase column chromatography (C<sub>18</sub> silica gel, 10–100% solvent B in solvent A. Solvent A: 5% formic acid solution (aq). Solvent B: MeCN) to yield the title compound **17** as a yellow oil (12 mg, 18 μmol, 36%).

R<sub>f</sub>: 0.33 (5% MeOH in CH<sub>2</sub>Cl<sub>2</sub>)

**HRMS** (ESI):  $[M+H]^+$  calc. for  $C_{36}H_{44}O_6N_4Cl^+$ : 663.2944, found 663.2933

$\nu_{max}$  (neat)/ $cm^{-1}$ : 3287 (m, N-H), 3067 (w, N-H), 2924 (s, C-H), 2865 (s, C-H), 2115 (w, alkyne), 1719 (s, C=O), 1655 (s, C=C), 1592 (s, C=C), 1525 (s, C=C), 1479 (m C-H), 1442 (s, C-H), 1347 (w, C-H), 1288 (s, C-O), 1214 (s, C-O), 1101 (s, C-N), 1033 (w, C-O), 1007 (w), 753 (s, C-H)

**$^1H$  NMR** (500 MHz,  $CDCl_3$ ):  $\delta$  8.28–8.27 (m, 1H), 7.98–7.96 (m, 1H), 7.77–7.51 (m, 1H), 7.42–7.35 (m, 7H), 7.28–7.27 (m, 1H), 7.24–7.22 (m, 1H), 4.14 (d,  $J = 2.4$  Hz, 2H), 3.89 (s, 3H), 3.77 (s, 2H), 3.66–3.62 (m, 4H), 3.58–3.56 (m, 2H), 3.53–3.50 (m, 2H), 3.34 (s, 2H), 3.29 (s, 2H), 2.70–2.64 (m, 4H), 2.43 (t,  $J = 2.4$  Hz, 1H), 1.58–1.57 (m, 4H) ppm

**$^{13}C$  NMR** (126 MHz,  $CDCl_3$ ):  $\delta$  170.7, 169.7, 166.8, 141.0, 139.2, 139.09, 138.3, 132.3, 131.3, 130.8, 129.4, 129.4, 129.0, 128.0, 127.5, 126.6, 125.1, 124.1, 120.5, 79.4, 74.9, 69.9, 69.5, 69.1, 60.0, 59.0, 58.4, 56.2, 53.0, 52.1, 48.9, 39.1, 27.6, 25.2 ppm

#### 1.4.18 Synthesis of compound S13

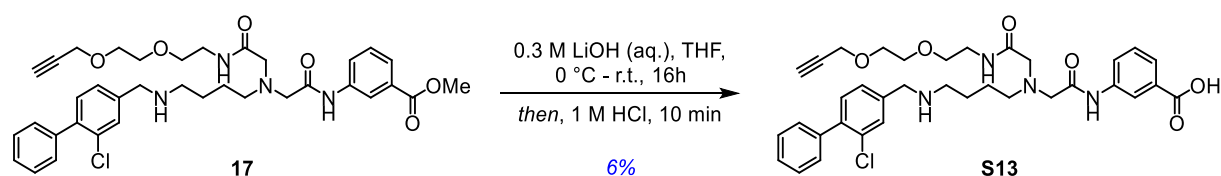

**17** (12 mg, 26  $\mu$ mol, 1.0 equiv) was dissolved in tetrahydrofuran (THF, 380  $\mu$ L) and 0.3 M aqueous LiOH solution (290  $\mu$ L, 87  $\mu$ mol, 3.3 equiv) was added at 0 °C. The reaction mixture was stirred at room temperature for 16 hours before 1 M HCl (224  $\mu$ L, 224  $\mu$ mol) was added. The reaction was stirred for 10 min, concentrated in vacuo and purified by preparative HPLC to yield the title compound **S13** as a white solid (1 mg, 1.5  $\mu$ mol, 6%).

$R_f$ : 0.02 (5% MeOH in  $CH_2Cl_2$ )

**HRMS** (ESI):  $[M+H]^+$  calc. for  $C_{35}H_{42}O_6N_4Cl^+$ : 649.2787, found 649.2800

$\nu_{max}$  (neat)/ $cm^{-1}$ : 3481 (br s, O-H), 2521 (m, C-H), 2159 (w, alkyne), 1735 (s, C=O), 1678 (s, C=C), 1374 (m, C-H), 1239 (s, C-O), 1204 (m, C-N), 1044 (s, C-O), 800 (s, C-H)

**$^1H$  NMR** (500 MHz,  $d_6$ -DMSO):  $\delta$  8.35–8.32 (m, 1H), 8.19–8.12 (m, 2H), 7.87–7.85 (m, 1H), 7.67–7.57 (m, 2H), 8.13–7.08 (m, 6H), 4.06–4.03 (m, 2H), 3.83–3.78 (m, 4H), 3.10–3.06 (m, 4H), 2.75 (t,  $J = 6.8$  Hz, 1H), 2.59–2.50 (m, 2H), 1.28–1.13 (m, 12H) ppm

<sup>13</sup>C NMR (126 MHz, d<sub>6</sub>-DMSO): δ 170.8, 170.4, 170.8, 145.3, 139.5, 130.6, 129.8, 125.9, 125.0, 124.49, 121.47, 120.3, 119.2, 116.6, 114.3, 81.1, 77.2, 59.5, 57.7, 55.8, 55.4, 52.7, 39.2, 29.5, 29.3, 26.3, 25.8, 24.2, 22.7 ppm

### Crystallographic data

**PDB code** 9TTA  
**Ligand** S13  
**Protein** K74A

### Data Collection

Beamline DIAMOND BEAMLINe i04-1  
Wavelength (Å) 0.9179  
Resolution range (Å) 58.17 - 1.91 (1.94-1.91)  
Space group P 1 21 1  
Cell (a b c) (Å) 57.626 46.103 62.648  
Cell (α β γ)(°) 90.0 111.8 90.0  
Total reflections 408838 (18780)  
Unique reflections 23838 (1098)  
Multiplicity 17.2 ( 17.1)  
Completeness (%) 99.7 ( 93.1)  
Mean I/sigma(I) 6.1 (0.3)  
R-merge 0.23146 (4.705)  
R-pim 0.062 (1.161)  
CC-half 0.9982 (0.320)

### Refinement

Refinement resolution range (Å) 58.17 - 1.91 (1.96-1.91)  
No. reflections 22012 (1146)  
No. reflections (R<sub>free</sub>) 1100 (53)  
R-factor 0.22889 (0.428)  
R<sub>free</sub> 0.28411 (0.452)  
Number of total atoms 2975  
atoms for macromolecules 2748  
atoms for ligands 48  
atoms for waters 179  
Average B-factor 51.844  
RMS(bonds) (Å) 0.01  
RMS(bond angles) (°) 0.97  
RMS(dihedral angles) (°) 3.29

### 1.4.19 Synthesis of ligand-linker precursor 18

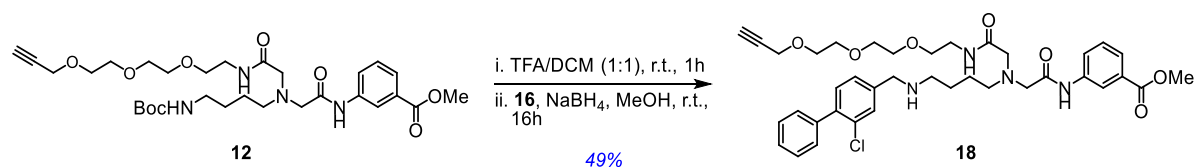

Prepared by *General Procedure C* using **12** (64 mg, 105 μmol, 1.0 equiv), TFA/CH<sub>2</sub>Cl<sub>2</sub> 1:1 (v/v, 1.5 mL), **16** (28 mg, 126 μmol, 1.2 equiv), NaBH<sub>4</sub> (5 mg, 137 μmol, 1.3 equiv) and MeOH (5 mL). The crude product was purified via reversed phase flash column chromatography (C<sub>18</sub> silica gel, 10–100% solvent

S18

B in solvent A. Solvent A: 5% formic acid solution (aq). Solvent B: MeCN) to yield the title compound **18** as a yellow oil (36 mg, 51  $\mu\text{mol}$ , 49%).

$R_f$ : 0.21 (5% MeOH in  $\text{CH}_2\text{Cl}_2$ )

**HRMS** (ESI):  $[\text{M}+\text{H}]^+$  calc. for  $\text{C}_{38}\text{H}_{48}\text{O}_7\text{N}_4\text{Cl}^+$ : 707.3206, found 707.3195

$\nu_{\text{max}}$  (neat)/ $\text{cm}^{-1}$ : 3288 (m, N-H), 3063 (w, N-H), 2928 (s, C-H), 2863 (s, C-H), 2115 (w, alkyne), 1719 (s, C=O), 1659 (s, C=C), 1592 (s, C=C), 1536 (s, C=C), 1479 (m C-H), 1442 (s, C-H), 1346 (w, C-H), 1288 (s, C-O), 1215 (s, C-O), 1100 (s, C-N), 1033 (w, C-O), 753 (s, C-H)

**$^1\text{H}$  NMR** (500 MHz,  $\text{CDCl}_3$ ):  $\delta$  8.66 (s, 1H), 8.29–8.27 (t, 1H), 7.98–7.96 (m, 1H), 7.77–7.75 (m, 1H), 7.43–7.35 (m, 7H), 7.29–7.27 (m, 1H), 7.25–7.24 (m, 1H), 6.89 (t,  $J = 5.0$  Hz, 1H), 4.17 (d,  $J = 2.4$  Hz, 2H), 3.89 (s, 3H), 3.79 (s, 2H), 3.69–3.55 (m, 12H), 3.34 (s, 2H), 3.30 (s, 2H), 2.70–2.66 (m, 4H), 2.43 (t,  $J = 2.4$  Hz, 1H), 1.60–1.57 (m, 4H) ppm

**$^{13}\text{C}$  NMR** (126 MHz,  $\text{CDCl}_3$ ):  $\delta$  170.9, 169.9, 166.9, 140.7, 139.1, 138.8, 138.4, 132.4, 131.3, 130.8, 129.5, 129.4, 129.0, 128.0, 127.5, 126.7, 125.0, 124.2, 120.6, 79.3, 74.9, 70.5, 70.2, 70.0, 69.6, 69.1, 60.0, 58.9, 58.4, 56.2, 52.9, 52.1, 48.9, 39.1, 27.4, 25.2 ppm

#### 1.4.20 Synthesis of ligand-linker precursor **19**

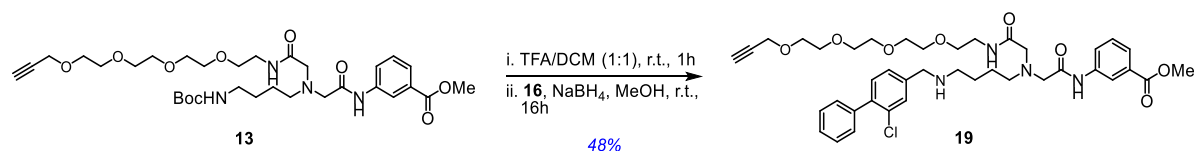

Prepared by *General Procedure C* using **13** (50 mg, 77  $\mu\text{mol}$ , 1.0 equiv), TFA/ $\text{CH}_2\text{Cl}_2$  1:1 (v/v, 1 mL), **16** (20 mg, 92  $\mu\text{mol}$ , 1.2 equiv),  $\text{NaBH}_4$  (4 mg, 100  $\mu\text{mol}$ , 1.3 equiv) and MeOH (5 mL). The crude product was purified by reversed phase column chromatography ( $\text{C}_{18}$  silica gel, 10–100% solvent B in solvent A. Solvent A: 5% formic acid solution (aq). Solvent B: MeCN) to yield the title compound **19** as a yellow oil (28 mg, 37  $\mu\text{mol}$ , 48%).

$R_f$ : 0.23 (5% MeOH in  $\text{CH}_2\text{Cl}_2$ )

**HRMS** (ESI):  $[\text{M}+\text{H}]^+$  calc. for  $\text{C}_{40}\text{H}_{52}\text{O}_8\text{N}_4\text{Cl}^+$ : 751.3456, found 751.3468

$\nu_{\text{max}}$  (neat)/ $\text{cm}^{-1}$ : 3296 (m, N-H), 2866 (s, C-H), 2115 (w, alkyne), 1719 (s, C=O), 1660 (s, C=C), 1593 (s, C=C), 1479 (m C-H), 1442 (s, C-H), 1347 (w, C-H), 1288 (s, C-O), 1215 (s, C-O), 1101 (s, C-N), 1033 (w, C-O), 753 (s, C-H)

**$^1\text{H}$  NMR** (400 MHz,  $\text{CDCl}_3$ ):  $\delta$  8.30–8.29 (m, 1H), 7.98–7.95 (m, 1H), 7.77–7.74 (m, 1H), 7.43–7.34 (m, 7H), 7.29–7.226 (m, 1H), 7.24–7.22 (m, 1H), 7.12–7.09 (m, 1H), 4.16 (d,  $J = 2.4$  Hz, 2H), 3.89 (s, 3H),

3.77 (s, 2H), 3.69–3.54 (m, 14H), 3.52–3.48 (m, 2H), 3.34 (s, 2H), 3.30 (s, 2H), 2.70–2.63 (m, 4H), 2.43 (t,  $J = 2.4$  Hz, 1H), 1.59–1.56 (m, 4H) ppm

$^{13}\text{C}$  NMR (101 MHz,  $\text{CDCl}_3$ ):  $\delta$  171.0, 170.0, 166.9, 141.1, 139.2, 139.0, 138.5, 132.3, 131.3, 130.8, 129.4, 128.9, 128.0, 127.5, 126.5, 124.9, 124.2, 120.6, 79.4, 74.8, 70.5, 70.4, 70.2, 69.7, 69.0, 60.0, 58.9, 58.3, 56.2, 53.0, 52.1, 49.0, 39.2, 27.6, 25.2 ppm

#### 1.4.21 Synthesis of ligand-linker precursor 20

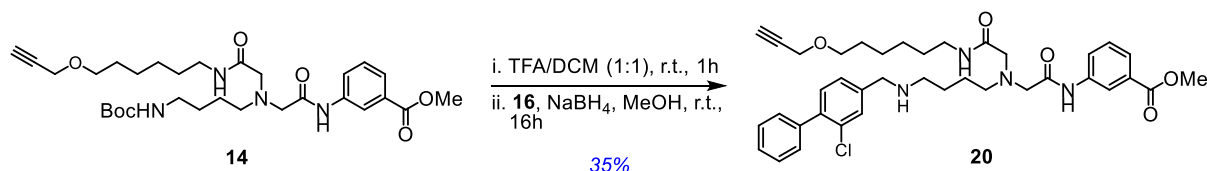

Prepared by *General Procedure C* using **14** (25 mg, 43  $\mu\text{mol}$ , 1.0 uiv, TFA/ $\text{CH}_2\text{Cl}_2$  1:1 (v/v, 0.5 mL), **16** (11 mg, 52  $\mu\text{mol}$ , 1.2 equiv),  $\text{NaBH}_4$  (2 mg, 56  $\mu\text{mol}$ , 1.3 equiv) and MeOH (5 mL). The crude product was purified by reversed phase column chromatography ( $\text{C}_{18}$  silica gel, 10–100% solvent B in solvent A. Solvent A: 5% formic acid solution (aq). Solvent B: MeCN) to yield the title compound **20** as a yellow oil (10 mg, 15  $\mu\text{mol}$ , 35%).

$R_f$ : 0.11 (5% MeOH in  $\text{CH}_2\text{Cl}_2$ )

**HRMS** (ESI):  $[\text{M}+\text{H}]^+$  calc. for  $\text{C}_{38}\text{H}_{48}\text{ClN}_4\text{O}_5^+$ : 675.3394, found 675.3391

$\nu_{\text{max}}$  (neat)/ $\text{cm}^{-1}$ : 3292 (m, N-H), 2860 (m, C-H), 2115 (w, alkyne), 1734 (s, C=O), 1696 (s, C=O), 1694 (s, C=C), 1676 (m, C=C), 1577 (s, C=C), 1423 (m, C-H), 1373 (m, C-H) 1236 (m, C-O), 1236 (m, C-N), 1123 (w, C-O), 760 (s, C-H)

$^1\text{H}$  NMR (500 MHz, MeOD):  $\delta$  8.36–8.31 (m, 1H), 7.87–7.23 (m, 2H), 7.49–7.31 (m, 9H), 4.12–4.05 (m, 2H), 3.91–3.85 (m, 3H), 3.51–3.41 (m, 4H), 3.26–3.22 (m, 2H), 2.94–2.91 (m, 1H) 2.81–2.78 (m, 1H), 2.71–2.67 (m, 2H), 1.80–1.29 (m, 18H) ppm

$^{13}\text{C}$  NMR (126 MHz,  $\text{CDCl}_3$ ):  $\delta$  172.8, 171.6, 166.7, 142.7, 139.3, 139.2, 138.3, 132.2, 131.4, 131.2, 130.4, 129.0, 128.9, 127.7, 127.7, 127.4, 127.2, 125.0, 124.9, 124.1, 120.3, 79.5, 74.2, 69.4, 67.4, 59.1, 58.3, 55.8, 51.3, 39.0, 29.4, 29.0, 28.9, 26.4, 26.2, 25.5, 24.6, 22.3 ppm

### 1.4.22 Synthesis of compound S15

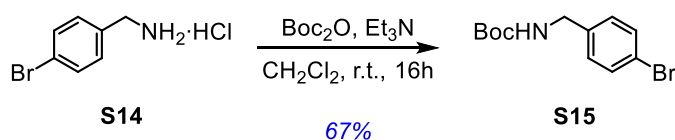

To a stirring suspension of 4-bromobenzylamine hydrochloride (**S14**, 3.0 g, 13.5 mmol, 1.0 equiv) in CH<sub>2</sub>Cl<sub>2</sub> (30 mL), Et<sub>3</sub>N (3.8 mL, 27.0 mmol, 2.0 equiv) was added, followed by Boc<sub>2</sub>O (3.25 g, 14.9 mmol, 1.1 equiv). The resulting solution was stirred for 16 hours at room temperature, after which LC–MS analysis indicated absence of the starting material. The reaction mixture was diluted with CH<sub>2</sub>Cl<sub>2</sub> (30 mL), and the organic layer was washed with aqueous saturated NH<sub>4</sub>Cl solution (2 × 40 mL) followed by brine (40 mL). The organic layer was then dried over anhydrous MgSO<sub>4</sub>, filtered, and the solvent was removed in vacuo to yield the title compound **S15** as a white solid (2.54 g, 8.88 mmol, 67%).

R<sub>f</sub>: 0.45 (20% EtOAc in PE)

<sup>1</sup>H NMR (500 MHz, CDCl<sub>3</sub>): δ 7.41 (d, *J* = 8.4 Hz, 1H), 7.13 (d, *J* = 8.3 Hz, 2H), 5.00 (br s, 1H), 4.23 (d, *J* = 5.6 Hz, 2H), 1.43 (s, 9H) ppm

<sup>13</sup>C NMR (126 MHz, CDCl<sub>3</sub>): δ 155.9, 138.1, 131.6, 129.1, 121.1, 79.7, 44.0, 26.41 ppm

Note: Data are in accordance with those reported previously in literature.[7]

### 1.4.23 Synthesis of compound S16

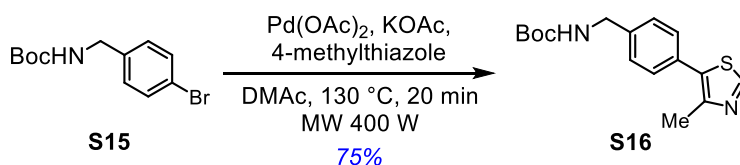

A suspension of **S15** (1.00 g, 3.49 mmol, 1.0 equiv), Pd(OAc)<sub>2</sub> (79 mg, 0.35 mmol, 0.1 equiv), 4-methylthiazole (637 μL, 7.00 mmol, 2.0 equiv) and KOAc (687 mg, 7.00 mmol, 2.0 equiv) in *N,N*-dimethylacetamide (3.5 mL), was prepared in a 2.0–5.0 mL Biotage<sup>®</sup> Microwave Reaction Vial. The solution was purged with dry N<sub>2</sub> for 1 minute before the tube was sealed. The sample was then placed inside a Biotage<sup>®</sup> Initiator<sup>+</sup> microwave unit and irradiated at 400 W and 130 °C for 20 min. Then, the mixture was cooled to room temperature and diluted with H<sub>2</sub>O (15 mL). The aqueous layer was extracted with CH<sub>2</sub>Cl<sub>2</sub> (3 × 15 mL). The combined organic layer was washed with brine (2 × 15 mL). The organic layer was then dried over anhydrous MgSO<sub>4</sub>, filtered, and concentrated in vacuo. The crude product was purified by flash column chromatography (SiO<sub>2</sub>, 0–50% EtOAc in PE 40–60) to give the title compound **S16** as a yellow solid (840 mg, 2.76 mmol, 75%).

**<sup>1</sup>H NMR** (400 MHz, MeOD): δ 8.78 (1H, s), 7.33–7.27 (4H, app. q, *J* = 8.5 Hz, 4H), 4.18 (s, 2H), 2.37 (s, 3H), 1.36 (s, 9H) ppm

**<sup>13</sup>C NMR** (101 MHz, MeOD): δ 157.2, 151.5, 147.6, 140.0, 132.1, 130.0, 129.4, 127.3, 78.9, 43.3, 27.4, 14.5 ppm

*Note: Data are in accordance with those reported previously in literature.[7]*

#### 1.4.24 Synthesis of compound S17

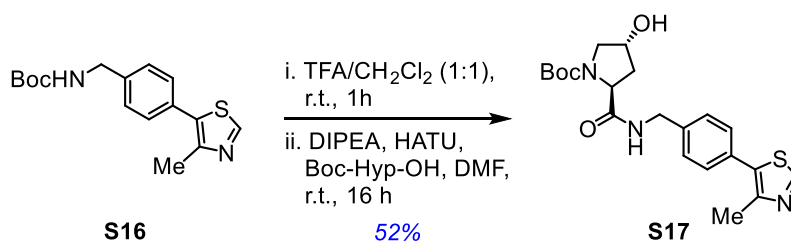

**S16** (800 mg, 2.63 mmol, 1.0 equiv) was dissolved in a solution of and TFA/CH<sub>2</sub>Cl<sub>2</sub> 1:1 (v/v, 6 mL). The solution was stirred for 1 hour at room temperature before being concentrated in vacuo. The residue was dissolved in DMF (15 mL), and Boc-L-hydroxyproline (605 mg, 2.63 mmol, 1.0 equiv) was added. To the stirring mixture, DIPEA (1.80 mL, 10.5 mmol, 4.0 equiv) was added, followed by HATU (1.10 g, 2.90 mmol, 1.2 equiv). The reaction was stirred for 16 hours at room temperature, after which LC–MS indicated absence of the starting material. The reaction mixture was diluted with H<sub>2</sub>O (100 mL) and extracted in EtOAc (3 × 50 mL). The combined organic layers were washed with 5% w/v aqueous LiCl solution (5 × 50 mL). The organic layer was then washed with brine (50 mL), dried over anhydrous MgSO<sub>4</sub>, filtered, and concentrated in vacuo. The crude product was purified *via* automated reversed-phase column chromatography (5–95% acetonitrile in 1% aqueous formic acid) to give the title compound **S17** as a white solid (571 mg, 1.37 mmol, 52%).

**<sup>1</sup>H NMR** (500 MHz, CDCl<sub>3</sub>): δ 8.67 (s, 1H), 7.37 (d, *J* = 8.1 Hz, 2H), 7.32 (d, *J* = 7.8 Hz, 2H), 4.57 – 4.31 (m, 4H), 3.67 – 3.45 (m, 2H), 2.90 (br s, 1H), 2.50 (s, 3H), 2.07 (br s, 1H), 1.42 (br s, 9H) ppm

**<sup>13</sup>C NMR** (126 MHz, CDCl<sub>3</sub>): δ 150.4, 148.4, 138.1, 131.6, 129.6, 128.2, 127.8, 80.9, 70.0, 58.8, 54.8, 43.0, 37.0, 27.9, 16.0 ppm

*Note: Data are in accordance with those reported previously in literature.[7]*

### 1.4.25 Synthesis of VHL Boc 21

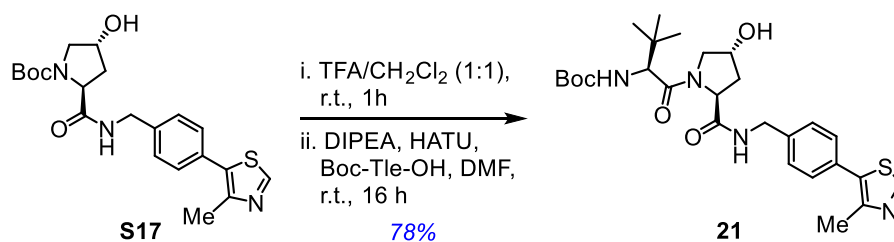

**S17** (500 mg, 1.20 mmol, 1.0 equiv) was dissolved in a solution of TFA/CH<sub>2</sub>Cl<sub>2</sub> 1:1 (v/v, 5 mL). The solution was stirred for 1 hour at room temperature before being concentrated in vacuo. The residue was dissolved in DMF (20 mL) and Boc-L-*tert*-leucine (278 mg, 1.20 mmol, 1.0 equiv) was added. To the stirring mixture, DIPEA (0.84 mL, 4.80 mmol, 4.0 equiv) was dropwise added, followed by HATU (502 mg, 1.32 mmol, 1.1 equiv). The reaction was stirred for 16 hours at ambient temperature. The reaction mixture was diluted with H<sub>2</sub>O (50 mL) and extracted in EtOAc (3 × 25 mL). The organic layers were combined and washed with a 5% w/v aqueous LiCl solution (5 × 25 mL) and brine (25 mL), dried over anhydrous MgSO<sub>4</sub>, and concentrated in vacuo. The crude product was purified via automated reversed-phase column chromatography (5–95% acetonitrile in 1% aqueous formic acid) to give the title compound **21** as a white solid (497 mg, 0.94 mmol, 78%).

**<sup>1</sup>H NMR** (700 MHz, CDCl<sub>3</sub>): δ 8.74 (s, 1H), 7.44 (t, *J* = 7.4 Hz, 1H), 7.36 – 7.33 (app. q, *J* = 7.34 Hz, 4H), 5.18 (d, *J* = 9.1 Hz, 1H), 4.45 (t, *J* = 7.9 Hz, 1H), 4.57 (dd, *J* = 14.9, 6.7 Hz, 1H), 4.38 – 4.33 (m, 1H), 4.32 (dd, *J* = 15.0, 5.1 Hz, 1H), 4.15 (d, *J* = 9.2 Hz, 1H), 4.08 (app. d, *J* = 11.4 Hz, 1H), 3.57 (dd, *J* = 11.4, 3.4 Hz, 1H), 2.57 – 2.53 (m, 1H), 2.14 – 2.11 (s, 3H), 1.90 (m, 1H), 1.38 (s, 9H), 0.93 (s, 9H) ppm

**<sup>13</sup>C NMR** (176 MHz, CDCl<sub>3</sub>): δ 172.8, 170.7, 156.5, 150.5, 147.9, 138.3, 132.0, 130.6, 129.5, 128.2, 80.5, 70.1, 58.9, 58.3, 56.5, 43.3, 35.7, 34.7, 28.3, 26.4, 15.8 ppm

*Note: Data are in accordance with those reported previously in literature.[7]*

### 1.4.26 Synthesis of VHL azide 22

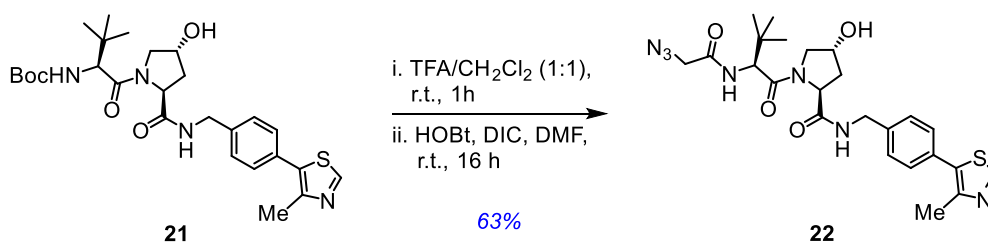

Prepared by *General Procedure B* using **21** (400 mg, 0.75 mmol, 1.0 equiv), TFA/CH<sub>2</sub>Cl<sub>2</sub> 1:1 (v:v, 4 mL), 2-azidoacetic acid (91 mg, 0.90 mmol, 1.2 equiv), HOBt (151 mg, 0.98 mmol, 1.3 equiv), DIC (155 μL,

0.98 mmol, 1.3 equiv) and DMF (10 mL). The crude product was purified via reversed phase flash column chromatography (C<sub>18</sub> silica gel, 10–100% solvent B in solvent A. Solvent A: 5% formic acid solution (aq). Solvent B: MeCN) to yield the title compound **22** as a white solid (242 mg, 0.47 mmol, 63%).

R<sub>f</sub>: 0.35 (5% MeOH in CH<sub>2</sub>Cl<sub>2</sub>)

HRMS (ESI): [M] calc. for C<sub>24</sub>H<sub>31</sub>N<sub>7</sub>O<sub>4</sub>S: 513.2158 found 513.2163

ν<sub>max</sub> (neat)/cm<sup>-1</sup>: 3650 (m, O-H), 2988 (w, C-H), 2940 (w, C-H), 2095 (w, N=C=S), 1734 (s, C=O), 1694 (s, C=O), 1573 (m, C=C), 1676 (s, C=O), 1423 (w, C-H), 1373 (m, C-H), 1236 (m, C-N), 1203 (m, C-N), 1171 (s, C-O), 1008 (w, C=C), 832 (w, C-H), 798 (s, C-H), 717 (w, C-H)

<sup>1</sup>H NMR (500 MHz, CDCl<sub>3</sub>): δ 8.79 (s, 1H), 7.40–7.35 (m, 4H), 7.23 (t, J = 5.9 Hz), 6.89 (d, J = 8.6 Hz, 1H), 4.74–4.71 (m, 1H), 4.62–4.55 (m, 2H), 4.49 (d, J = 8.7 Hz, 1H), 4.37–4.33 (m, 1H), 4.09–3.94 (m, 3H), 3.63 (dd, J = 11.3, 3.8 Hz, 1H), 2.63–2.58 (m, 1H), 2.56 (s, 3H), 2.15–2.10 (m, 1H), 0.95 (s, 9H) ppm

<sup>13</sup>C NMR (126 MHz, CDCl<sub>3</sub>): δ 171.2, 170.5, 167.0, 151.9, 147.0, 140.6, 133.5, 129.49, 129.44, 70.2, 58.5, 57.5, 56.7, 52.5, 43.3, 35.8, 35.1, 26.4 ppm

#### 1.4.27 Synthesis of final VHL PROTAC **23**

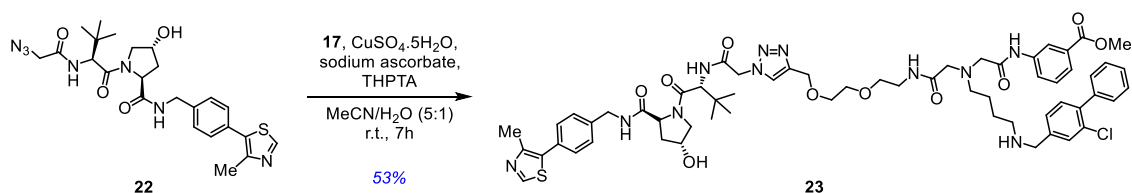

Prepared by *General Procedure D* using **17** (11 mg, 16 μmol, 1.0 equiv), **22** (8 mg, 16 μmol, 1.0 equiv), THPTA (14 mg, 32 μmol, 2.0 equiv), sodium ascorbate (19 mg, 96 μmol, 6.0 equiv), and Cu<sub>2</sub>SO<sub>4</sub>·5H<sub>2</sub>O (8 mg, 32 μmol, 2.0 equiv). The reaction was purified via by HPLC (method: 25–65% B, 20 min) to yield the title compound **23** as a white solid (10 mg, 8.5 μmol, 53%).

R<sub>f</sub>: 0.25 (5% MeOH in CH<sub>2</sub>Cl<sub>2</sub>)

HRMS (ESI): [M] calc. for C<sub>60</sub>H<sub>74</sub>ClN<sub>11</sub>O<sub>10</sub>S: 1175.5029, found 1175.5031

ν<sub>max</sub> (neat)/cm<sup>-1</sup>: 3650 (m, O-H), 2488 (w, C-H), 2234 (w, C-H), 2095 (w, N=C=S), 1734 (s, C=O), 1692 (s, C=O), 1373 (m, C-H), 1238 (m, C-N), 1203 (m, C-N), 1169 (s, C-O), 1131 (w, C=C), 1082 (w, C=C), 967 (w, C-H), 895 (s, C-H), 818 (w, C-H)

<sup>1</sup>H NMR (500 MHz, MeOD): δ 8.91 (br s, 1H), 8.31–8.28 (m, 1H), 7.99 (br s, 1H), 7.77–7.76 (m, 2H), 7.69 (br s, 1H), 7.50–7.33 (m, 12H), 5.31–5.21 (m, 2H), 4.63–4.52 (m, 5H), 4.36–4.33 (m, 1H), 4.26 (s,

2H), 3.88 (s, 3H), 3.83–3.54 (m, 11H), 3.45–3.43 (m, 2H), 3.35 (s, 1H), 2.46 (s, 3H), 2.21–2.18 (m, 1H), 2.09–2.03 (m, 1H) 1.83–1.77 (m, 8H), 1.28 (s, 9H), 0.91–0.88 (m, 2H) ppm

**<sup>13</sup>C NMR** (126 MHz, MeOD): δ 172.9, 170.4, 166.6, 166.3, 151.6, 147.4, 144.4, 141.6, 138.9, 138.4, 138.1, 132.6, 132.2, 131.7, 131.1, 130.8, 130.0, 128.9, 128.9, 128.4, 127.8, 127.7, 127.6, 125.5, 125.1, 124.0, 120.5, 69.7, 69.6, 69.4, 69.3, 67.6, 63.4, 59.7, 59.5, 58.3, 57.3, 56.6, 55.7, 51.4, 51.3, 50.1, 42.9, 42.3, 40.0, 39.0, 37.6, 36.1, 35.2, 33.5, 31.7, 29.3, 29.2, 29.0, 28.8, 25.6, 23.6, 22.9, 22.3, 14.3 ppm

#### 1.4.28 Synthesis of final VHL PROTAC **24**

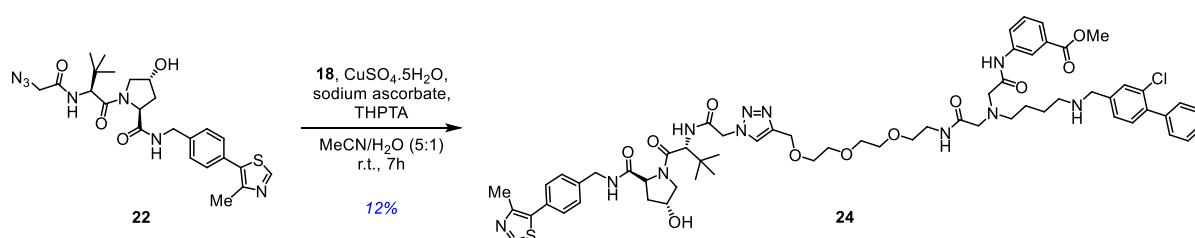

Prepared by *General Procedure D* using **18** (15 mg, 21 μmol, 1.0 equiv), **22** (11 mg, 21 μmol, 1.0 equiv), THPTA (18 mg, 42 μmol, 2.0 equiv), sodium ascorbate (25 mg, 126 μmol, 6.0 equiv), Cu<sub>2</sub>SO<sub>4</sub>·5H<sub>2</sub>O (11 mg, 42 μmol, 2.0 equiv). The reaction was indicated as completed by absence of starting material on LC–MS. The reaction mixture was concentrated in vacuo and purified via by HPLC (method: 25–65% B, 20 min) to yield the title compound **24** as a white solid (3 mg, 2.5 μmol, 12%).

**R<sub>f</sub>**: 0.16 (5% MeOH in CH<sub>2</sub>Cl<sub>2</sub>)

**HRMS** (ESI): [M+H]<sup>+</sup> calc for [C<sub>62</sub>H<sub>78</sub>N<sub>11</sub>O<sub>11</sub>S<sub>1</sub>Cl+H]<sup>+</sup>: 1220.5370, found 1220.5364

**ν<sub>max</sub>** (neat)/cm<sup>-1</sup>: 3634 (m, O-H), 2488 (w, C-H), 2239 (w, C-H), 2081 (w, N=C=S), 1743 (s, C=O), 1670 (s, C=O), 1319 (m, C-H), 1249 (m, C-N), 1201 (m, C-N), 1166 (s, C-O), 1082 (w, C=C), 961 (w, C-H), 909 (s, C-H)

**<sup>1</sup>H NMR** (700 MHz, CDCl<sub>3</sub>): δ 8.68 (s, 1H), 7.83 – 7.70 (br m, 2H), 7.76 – 7.53 (br m, 2H), 7.45–7.29 (m, 9H), 5.43 – 5.39 (br m, 5H), 5.35 (app. d, *J* = 4.87 Hz, 2H), 4.05 – 4.02 (m, 4H), 3.88 (s, 3H), 3.75–3.51 (m, 12H), 2.44 (s, 3H), 2.37 – 2.34 (m, 2H), 2.25 – 2.21 (m, 5H) 1.83–1.77 (br m, 4H), 2.18 (s, 1H), 2.06 – 1.98 (m, 5H), 1.09 (s, 9H) ppm

*Note: Yield too low to obtain a well resolved <sup>1</sup>H and <sup>13</sup>C NMR spectra due to poor HPLC purification. The compound was carried forward to in vitro testing.*

### 1.4.29 Synthesis of final VHL PROTAC 25

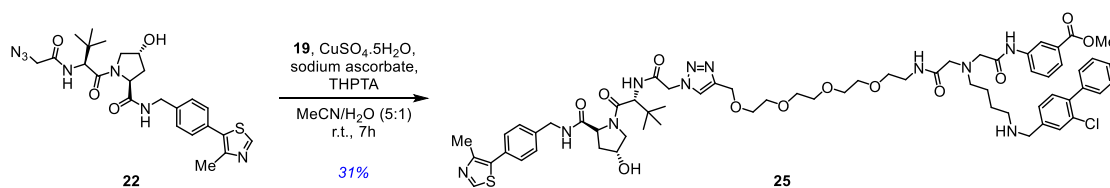

Prepared by General Procedure D using **19** (20 mg, 26  $\mu$ mol, 1.0 equiv), **22** (13 mg, 26  $\mu$ mol, 1.0 equiv), THPTA (23 mg, 52  $\mu$ mol, 2.0 equiv), sodium ascorbate (31 mg, 156  $\mu$ mol, 6.0 equiv), Cu<sub>2</sub>SO<sub>4</sub>·5H<sub>2</sub>O (13 mg, 52  $\mu$ mol, 2.0 equiv). The reaction mixture was concentrated in vacuo and purified via by HPLC (method: 25–65% B, 20 min) to yield the title compound **25** as a white solid (10 mg, 8  $\mu$ mol, 31%).

R<sub>f</sub>: 0.13 (5% MeOH in CH<sub>2</sub>Cl<sub>2</sub>)

HRMS (ESI): [M+H]<sup>+</sup> calc for [C<sub>64</sub>H<sub>82</sub>N<sub>11</sub>O<sub>12</sub>S<sub>1</sub>Cl+H]<sup>+</sup>: 1264.5632, found 1264.5669

$\nu_{\max}$  (neat)/cm<sup>-1</sup>: 3130 (m, O-H), 2892 (s, C-H), 2488 (w, C-H), 2252 (w, C-H), 2078 (w, N=C=S), 1720 (s, C=O), 1671 (s, C=O), 1326 (m, C-H), 1253 (w, C-N), 1166 (s, C-O), 1079 (w, C=C), 965 (w, C-H), 910 (s, C-H)

<sup>1</sup>H NMR (700 MHz, CDCl<sub>3</sub>):  $\delta$  8.91 (s, 1H, H<sup>1</sup>), 8.33 (br s, 1H, H<sup>24</sup>), 8.16 (br s, 1H, H<sup>17</sup>) 7.76 (d, J = 7.56 Hz, 1H, H<sup>23</sup>), 7.70 (br s, 1H, H<sup>21</sup>), 7.58 (s, 1H, H<sup>22</sup>), 7.45–7.31 (m, 10H), 7.24–7.23 (m, 2H), 5.01 (br d, 1H, O-H), 4.80 (br s, 1H, H<sup>15</sup>), 4.60 – 4.54 (m, 4H), 4.47 (s, 2H, H<sup>8</sup>), 4.40 – 4.36 (m, 3H), 4.27 (br s, 1H, H<sup>11</sup>), 4.16 – 4.01 (m, 4H), 3.88 (s, 3H, H<sup>19</sup>), 3.74–3.51 (m, 17H, likely O-CH<sub>2</sub>), 2.46 (s, 3H, H<sup>3</sup>), 2.29 – 2.23 (m, 2H), 2.17 – 2.08 (m, 4H), 1.83 – 1.77 (br m, 4H), 1.03 (s, 9H, H<sup>14</sup>), 0.84 (br s, 2H) ppm

<sup>13</sup>C NMR (176 MHz, CDCl<sub>3</sub>):  $\delta$  171.7, 171.2, 166.8, 162.9, 161.3, 160.1, 151.4, 146.2, 141.7, 139.5, 138.4, 137.6, 135.7, 133.1, 133.0, 132.0, 131.6, 131.1, 130.9, 129.3, 129.2, 128.2, 126.0, 124.6, 121.1, 116.8, 115.1, 70.3, 70.1, 69.6, 64.0, 59.6, 58.5, 57.6, 52.3, 47.7, 46.5, 42.8, 39.7, 37.8, 35.4, 31.9, 26.5, 14.9 ppm

Note: Grease present in NMR: (<sup>1</sup>H: 1.26 (s), 0.88 (m)  $\delta$  ppm.; <sup>13</sup>C: 29.7  $\delta$  ppm).

### 1.4.30 Synthesis of final VHL PROTAC 26

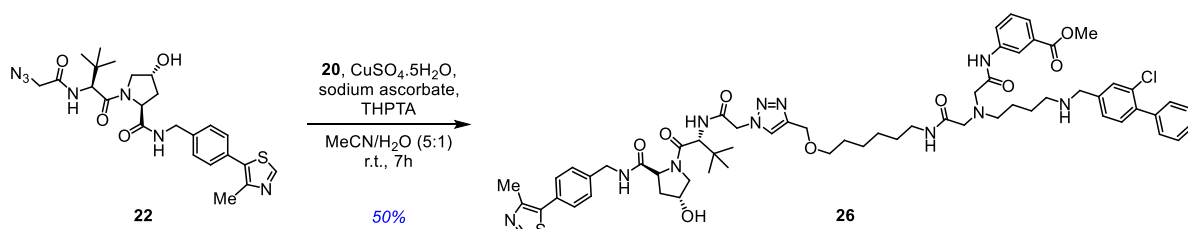

Prepared by General Procedure D using **20** (17 mg, 24  $\mu$ mol, 1.0 equiv), **22** (12 mg, 24  $\mu$ mol, 1.0 equiv) THPTA (21 mg, 48  $\mu$ mol, 2.0 equiv), sodium ascorbate (29 mg, 144  $\mu$ mol, 6.0 equiv) Cu<sub>2</sub>SO<sub>4</sub>·5H<sub>2</sub>O

(12 mg, 48  $\mu$ mol, 2.0 equiv). The reaction mixture was concentrated in vacuo and purified via by HPLC (method: 25–65% B, 20 min) to yield the title compound **26** as a white solid (15 mg, 12  $\mu$ mol, 50%).

$R_f$ : 0.09 (10% MeOH in  $\text{CH}_2\text{Cl}_2$ )

**HRMS** (ESI):  $[\text{M}+\text{H}]^+$  calc for  $[\text{C}_{62}\text{H}_{78}\text{N}_{11}\text{O}_9\text{S}_1\text{Cl}_1+\text{H}]^+$ : 1188.5471, found 1188.5466

$\nu_{\text{max}}$  (neat)/ $\text{cm}^{-1}$ : 3254 (w, O-H), 2962 (w, C-H), 2863 (w, C-H), 1666 (s, C=O), 1561 (m, C-O), 1443 (m, C-H), 1298 (m, C-N), 1199 (s, C-O), 1131 (s, C-O) 1082, (m C=C), 3130 (m, O-H), 2892 (s, C-H), 2488 (w, C-H), 2252 (w, C-H), 1720 (s, C=O), 1671 (s, C=O), 1326 (m, C-H), 1253 (w, C-N), 1166 (s, C-O), 1079 (w, C=C), 965 (w, C-H), 910 (s, C-H)

**$^1\text{H}$  NMR** (700 MHz,  $\text{d}_6$ -DMSO):  $\delta$  8.99 (s, 1H), 8.61 (app t,  $J = 6.1$  Hz, 1H), 8.54 (app. d,  $J = 1.5$  Hz, 1H), 8.32 (app. t,  $J = 1.8$  Hz, 1H), 8.00 (s, 1H), 7.80 (d,  $J = 8.0$  Hz, 1H), 7.74 (m, 1H), 7.70 (t,  $J = 4.5$  Hz, 1H), 7.53 – 7.47 (m, 4H), 7.45 – 7.38 (m, 7H), 5.22 (q,  $J = 14.4$  Hz, 2H), 4.53 (d,  $J = 9.3$  Hz, 1H), 4.46 – 4.37 (m, 4H), 4.33 (app s, 1H), 4.23 – 4.20 (m, 4H), 3.85 (s, 3H), 3.66 (dd,  $J = 10.5$  Hz, 4.0 Hz, 1H), 3.57 (d,  $J = 10.6$  Hz, 1H), 3.40 (t,  $J = 6.6$  Hz, 2H), 3.12 (app. q,  $J = 6.5$  Hz, 2H), 2.97 (app. s, 2H), 2.45 (s, 3H), 2.06 – 2.03 (m, 1H), 1.92 – 1.88 (m, 1H), 1.67 (br s, 4H), 1.48 – 1.46 (m, 2H), 1.42 – 1.41 (m, 2H), 1.27 – 1.26 (m, 4H), 0.96 (s, 9H) ppm

**$^{13}\text{C}$  NMR** (126 MHz,  $\text{d}_6$ -DMSO):  $\delta$  172.3, 169.5, 167.5, 166.5, 166.4, 165.8, 151.9, 148.2, 144.2, 140.8, 140.0, 139.0, 138.5, 133.7, 132.2, 132.1, 131.8, 131.7, 131.6, 130.7, 130.1, 129.6, 129.5, 129.3, 129.1, 128.8, 128.5, 127.9, 125.9, 125.0, 124.3, 120.3, 117.6, 116.0, 70.0, 69.3, 67.9, 63.7, 59.2, 57.3, 57.0, 55.5, 52.8, 51.7, 49.5, 46.7, 42.1, 39.1, 38.4, 36.1, 29.5, 29.3, 26.8, 26.7, 26.6, 25.8, 16.4, 14.4, 11.3 ppm

#### 1.4.31 Synthesis of CK2 precursor **27**

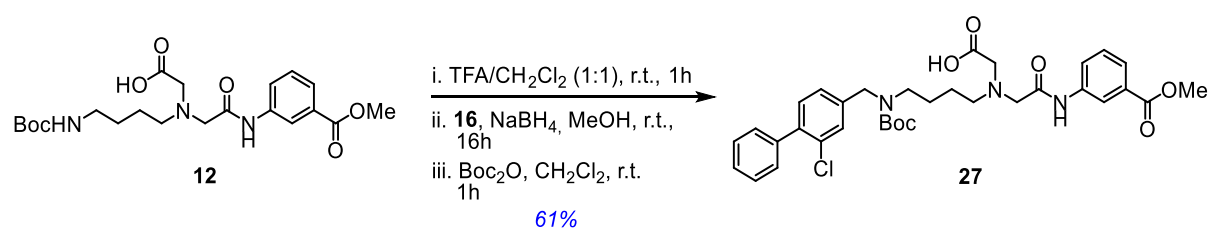

Prepared by General Procedure C using **12** (1.00 g, 2.29 mmol, 1.0 equiv), TFA/ $\text{CH}_2\text{Cl}_2$  1:1 (v/v, 4.0 mL), **16** (594 mg, 2.74 mmol, 1.2 equiv),  $\text{NaBH}_4$  (113 mg, 2.98 mmol, 1.3 equiv) and MeOH (5 mL). The crude product was purified via reversed phase flash column chromatography ( $\text{C}_{18}$  silica gel, 10–100% solvent B in solvent A. Solvent A: 5% formic acid solution (aq). Solvent B: MeCN) to yield the intermediate amine salt, which was dissolved in  $\text{CH}_2\text{Cl}_2$  (8 mL) and the pH was adjusted to 7 by

dropwise addition of DIPEA. To the stirring solution was added Boc<sub>2</sub>O (600 mg, 2.75 mmol, 1.2 equiv) and the mixture was left to stir for 1 hour at room temperature, after which LC–MS indicated an absence of starting material. The reaction mixture was concentrated and purified via basic combi flash column chromatography (C<sub>18</sub> silica gel, 10–100% solvent B in solvent A. Solvent A: 2.5 % NH<sub>4</sub>OH solution (aq). Solvent B: MeCN) to yield the title compound **27** as a white solid (0.89 g, 1.39 mmol, 61%).

R<sub>f</sub>: 0.34 (5% MeOH in CH<sub>2</sub>Cl<sub>2</sub>)

HRMS (ESI): [M+H]<sup>+</sup> calc. for C<sub>34</sub>H<sub>41</sub>O<sub>7</sub>N<sub>3</sub>Cl<sup>+</sup>: 638.2633, found 638.2616

ν<sub>max</sub> (neat)/cm<sup>-1</sup>: 2979 (br, w C-H), 1805 (m, s C=O), 1754 (m, s C=O), 1720 (s, s C=O acid), 1687 (s, s C=O), 1655 (s, s C=C), 1638 (m, s C=C), 1626 (m, s C=C), 1479 (m, s C-H), 1289 (s, s C-O), 1211 (s, s C-O or C-N), 1163 (s, s C-O or C-N), 1140 (s, s C-O or C-N), 1069 (s, s C-O or C-N).

<sup>1</sup>H NMR (500 MHz, CDCl<sub>3</sub>): δ 10.1 (s, 1H, -NH), 8.16 (appt. br s, 1H, H<sup>4</sup>), 7.92 (app br s, 1H, H<sup>6</sup>), 7.73 (app br d, J = 8.68 Hz, 1H, H<sup>8</sup>), 7.41 – 7.33 (m, 7H, H<sup>7/25/21/22/23</sup>), 7.29–7.27 (m, 1H, H<sup>17</sup>), 7.25 – 7.24 (m, 1H, H<sup>24</sup>), 7.10 (br s, 1H, -NH), 4.39 (br d, 2H, H<sup>26</sup>), 3.87 (s, 3H, H<sup>1</sup>), 3.70 (br s, 2H, H<sup>15</sup>), 3.59 (br s, 2H H<sup>10</sup>), 3.28 – 3.15 (m, 2H, H<sup>11 or 14</sup>), 2.95 – 2.48 (m, 2H, H<sup>11 or 14</sup>), 1.60–1.57 (m, 4H, H<sup>12/13</sup>) 1.52 (s, 9H, H<sup>35</sup>) ppm

<sup>13</sup>C NMR (126 MHz, CDCl<sub>3</sub>): δ 172.57, 168.1, 166.8, 155.8, 146.8, 140.7, 139.4, 139.1, 137.9, 137.9, 132.6, 132.5, 131.8, 130.8, 129.4, 129.2, 128.5, 128.0, 127.6, 125.4, 120.6, 85.2, 56.5, 55.6, 52.3, 49.8, 46.1, 31.2, 28.7, 28.4, 27.4 ppm

#### 1.4.32 Synthesis of final CRBN PROTAC **28**

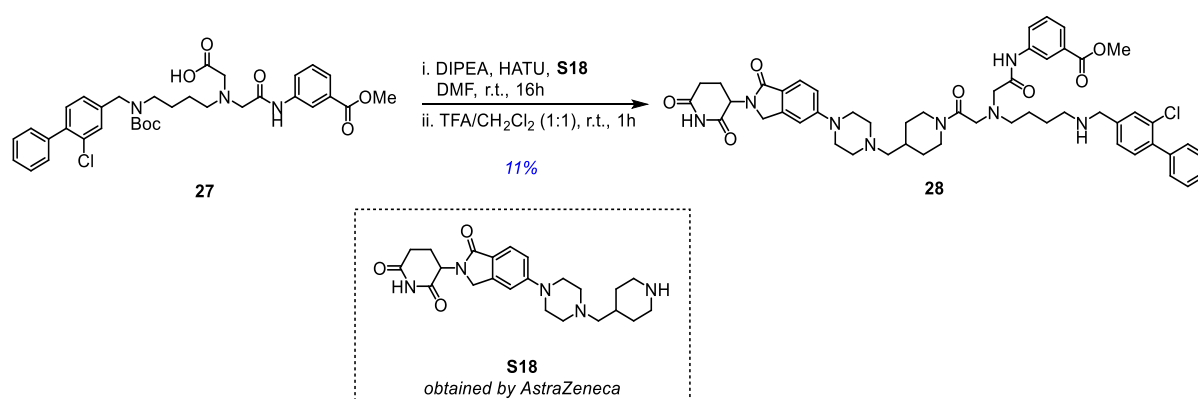

**27** (20 mg, 31 μmol, 1.0 equiv) was dissolved in DMF (1 mL) and **S18** (13 mg, 31 μmol, 1.0 equiv) was added. To the stirring mixture, DIPEA (22 μL, 124 μmol, 4.0 equiv) was added, followed by HATU (13 mg, 34 μmol, 1.1 equiv). The reaction mixture was stirred for 16 hours at room temperature, after which LC–MS indicated an absence of starting material. The reaction mixture was concentrated in vacuo and redissolved in TFA/CH<sub>2</sub>Cl<sub>2</sub> 1:1 (v/v, 1.5 mL). The mixture was stirred at room temperature

for 1 hour, before being concentrated in vacuo. The reaction was purified *via* RP-HPLC (method: 25–95% B, 20 min) to yield the title compound **28** as a white solid (3 mg, 3.3  $\mu$ mol, 11%).

$R_f$ : 0.12 (5% MeOH in  $\text{CH}_2\text{Cl}_2$ )

**HRMS** (ESI):  $[\text{M}+\text{H}]^+$  calc. for  $[\text{C}_{52}\text{H}_{61}\text{O}_7\text{N}_8\text{Cl}+\text{H}]^+$ : 945.4430, found 945.4398

$\nu_{\text{max}}$  (neat)/ $\text{cm}^{-1}$ : 1697 (m, C=O), 1685, (m, C=O), 1663 (s, C=C), 1654 (s, C=C), 1637 (s, C=C), 1559 (s, N-H or C-N), 1541 (s, N-H or C-N), 1534 (s, N-H or C-N), 1522 (s, N-H or C-N), 1508 (m, C=C), 1475 (m, C=C), 1400 (C-H), 1253 (w, C-O or C-N), 1202 (w, C-O or C-N), 1177 (w, C-O or C-N)

**$^1\text{H}$  NMR** (700 MHz,  $\text{d}_6$ -DMSO):  $\delta$  8.33 (app. t,  $J = 1.7$  Hz, 1H), 7.95 (s, 1H), 7.82 (d,  $J = 1.4$  Hz, 1H), 7.74 (d,  $J = 1.4$  Hz, 1H), 7.69 (d,  $J = 7.6$  Hz, 1H), 7.60 (d,  $J = 8.5$  Hz, 1H), 7.53 – 7.41 (m, 7H) 7.21 – 7.14 (m, 2H), 5.06 (dd,  $J = 13.3, 5.1$  Hz, 1H), 4.36 (d,  $J = 17.0$  Hz, 2H), 4.24 (d,  $J = 17.2$  Hz, 2H), 4.22 – 4.21 (br s, 1H), 4.03 – 3.98 (br m, 2H), 3.85 (s, 3H), 3.68 – 3.43 (m, 11H), 3.24 – 2.90 (m, 10H), 2.62 – 2.58 (m, 1H), 2.38 (qd,  $J = 26.4, 13.2, 4.6$  Hz, 1H), 2.17 – 2.10 (br s, 1H), 1.98 – 1.96 (m, 1H) 1.82 – 1.68 (m, 6H), 1.20 – 1.19 (m, 1H), 1.09 – 1.07 (m, 1H) ppm

**$^{13}\text{C}$  NMR** (126 MHz,  $\text{d}_6$ -DMSO):  $\delta$  173.4, 171.7, 168.6, 166.5, 152.8, 144.6, 140.7, 138.5, 133.7, 132.1, 131.8, 131.7, 130.7, 129.9, 129.5, 128.8, 128.5, 124.4, 124.1, 123.3, 120.1, 115.9, 109.7, 60.9, 56.2, 55.8, 52.7, 51.9, 51.5, 49.5, 47.5, 46.9, 45.2, 44.1, 41.5, 31.2, 31.7, 30.5, 29.6, 23.0 ppm

### 1.4.33 Synthesis of final CRBN PROTAC **29**

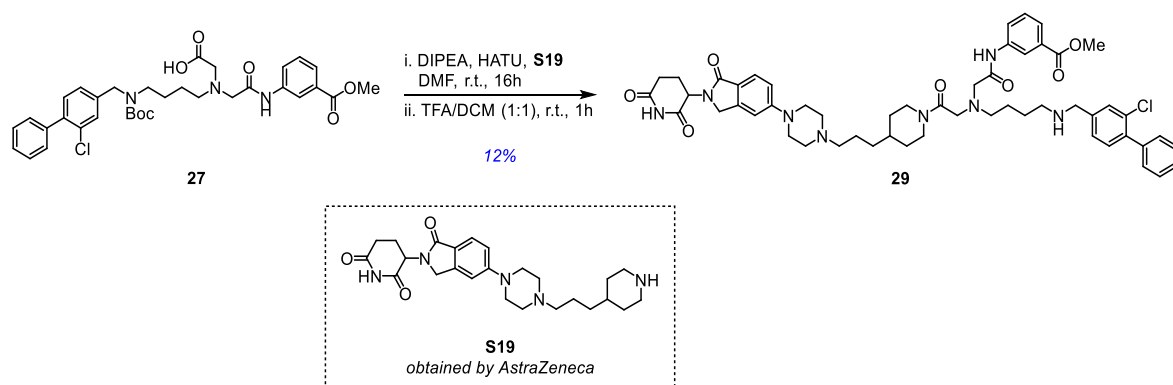

**27** (20 mg, 31  $\mu$ mol, 1.0 equiv) was dissolved in DMF (1 mL) and **S19** (14 mg, 31  $\mu$ mol, 1.0 equiv) was added. To the stirring mixture, DIPEA (22  $\mu$ L, 124  $\mu$ mol, 4.0 equiv) was dropwise added, followed by HATU (13 mg, 34  $\mu$ mol, 1.1 equiv). The reaction mixture was stirred for 16 hours at room temperature, after which LC–MS indicated an absence of starting material. The reaction mixture was concentrated in vacuo and redissolved in TFA/  $\text{CH}_2\text{Cl}_2$  1:1 (v/v, 1.5 mL). The mixture was stirred at room temperature for 1 hour, before being concentration in vacuo. The reaction was purified *via* by HPLC (method: 25–95% B, 20 min) to yield the title compound **29** as a white solid (4 mg, 3.7  $\mu$ mol, 12%).

**R<sub>f</sub>**: 0.13 (5% MeOH in CH<sub>2</sub>Cl<sub>2</sub>)

**HRMS** (ESI): [M+H]<sup>+</sup> calc. for [C<sub>54</sub>H<sub>63</sub>O<sub>7</sub>N<sub>8</sub>Cl+H]<sup>+</sup>: 973.4743, found 973.4731

**ν<sub>max</sub>** (neat)/cm<sup>-1</sup>: 1686 (m, C=O), 1671, (m, C=O), 1619 (s, C=C), 1654 (s, C=C), 1578 (s, N-H or C-N), 1572 (s, N-H or C-N), 1561 (s, N-H or C-N), 1528 (s, N-H or C-N), 1491 (m, C=C), 1478 (m, C=C), 1450 (C-H), 1237 (w, C-O or C-N), 1200 (s, C-O or C-N), 1127 (m, C-O or C-N)

**<sup>1</sup>H NMR** (700 MHz, d<sub>6</sub>-DMSO): δ 8.33 (app. t, *J* = 7.6 Hz, 1H), 7.95 (s, 1H), 7.81 (d, *J* = 1.4 Hz, 1H), 7.74 (d, *J* = 1.5 Hz, 1H), 7.69 (d, *J* = 7.4 Hz, 1H), 7.59 (d, *J* = 8.5 Hz, 1H), 7.53 – 7.41 (m, 7H), 7.21 – 7.14 (m, 2H), 5.06 (dd, *J* = 13.3, 5.1 Hz, 1H), 4.35 (d, *J* = 17.0 Hz, 2H), 4.25 – 4.20 (m, 3H), 4.22 – 4.21 (d, *J* = 8.0 Hz, 1H), 3.85 (s, 3H), 3.79 – 3.49 (m, 8H), 3.24 – 2.90 (m, 11H), 1.98 – 1.95 (m, 2H), 2.38 (qd, *J* = 26.5, 13.3, 4.5 Hz, 1H), 1.98 – 1.95 (m, 1H), 1.74 – 1.49 (m, 9H), 1.23 – 1.22 (m, 2H), 1.08 – 1.22 (m, 1H), 0.96 – 0.98 (m, 1H) ppm

**<sup>13</sup>C NMR** (126 MHz, d<sub>6</sub>-DMSO): δ 173.4, 171.7, 168.6, 166.5, 152.8, 144.6, 140.7, 138.5, 133.7, 132.2, 131.8, 131.7, 130.7, 129.9, 129.6, 128.8, 128.5, 124.4, 124.1, 123.3, 120.1, 116.0, 108.0, 56.0, 52.7, 51.9, 50.9, 49.5, 47.5, 46.9, 45.6, 44.8, 42.2, 35.0, 32.9, 31.2, 31.7, 23.0, 23.0, 20.9 ppm

## 2. Biological and biophysical evaluation

### 2.1 Isothermal titration calorimetry (ITC)

All ITC experiments were performed at 25 °C using a MicroCal itc200 instrument (GE Healthcare). CK2 $\alpha$ \_K74A (10 mg/mL, 20mM Tris pH 8.0, 300 mM NaCl) was diluted in Tris buffer (200 mM Tris, 300 mM NaCl, 10% DMSO) and concentrated to 5–10  $\mu$ M. Ligand **S13** or **24** in 100 $\times$  stock solutions in DMSO was diluted into the buffer ensuring that the DMSO concentrations were carefully matched. For **S13** CK2 $\alpha$ \_K74A (5  $\mu$ M) was loaded into the sample cell and 100  $\mu$ M of the ligand was titrated in nineteen 2  $\mu$ L injections of 2 s duration at 120 s intervals, with injector speed of 750 rpm. For **24** CK2 $\alpha$ \_K74A (7  $\mu$ M) was loaded into the sample cell and 200  $\mu$ M of the ligand was titrated into the cell. The solubility was limited above this concentration. Heats of dilution were determined in identical experiments, but without protein in the cell. The data fitting was performed with a single site binding model using the Origin software package.

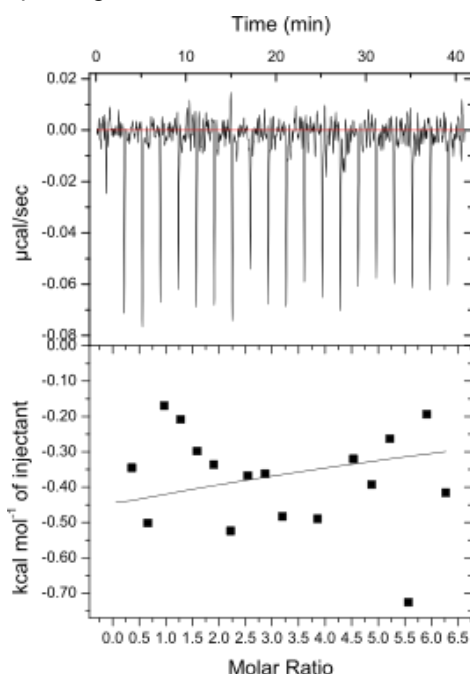

**Figure S1:** ITC of PROTAC **24**.

### 2.2 Cell lines

The HCT-116 and MDA-MB-231 cell lines were obtained from the American Type Culture Collection.

### 2.3 Cell culture

HCT-116 cells were cultured in McCoy's 5<sup>a</sup> (Modified) Medium (DMEM) (gibco, 16600082) supplemented with 10% fetal bovine serum (FBS) (gibco, 11875093) 2 mM L-glutamine and 50  $\mu$ g/mL streptomycin. MDA-MB-231 cells were cultured in RPMI-1640 Medium supplemented with 10% FBS, 2 mM L-glutamine and 50  $\mu$ g/ mL streptomycin. Cells were maintained for no more than 50 passages at 37 °C with 5% CO<sub>2</sub>.

## **2.4 Treatment with PROTACs**

Cells were counted using the Vi-CELL XR cell viability analyser, as per manufactures instructions, and the desired number of cells seeded in full media in individual 10 cm plates (Corning, #430167) and the cells were allowed to adhere overnight. The cells were then treated with the desired concentration of PROTAC. The PROTAC was dissolved in DMSO and was added directly to the cell culture media, the final DMSO concentration was 0.01%.

## **2.5 SDS-PAGE followed by Western blot**

### ***2.5.1 Lysate preparation***

Upon removal from the incubator, the plates containing the cells were placed on ice. The media was aspirated and the plates washed with twice with ice cold PBS. RIPA buffer containing protease and phosphatase inhibitor was added and the cells were detached from the surface with a cell scraper. After centrifugation (8000 rpm for 3 min at 4 °C), the supernatant was discarded and the pellet flash frozen and stored at -80 °C or taken forward for lysis. The pellet was resuspended in RIPA buffer containing protease and phosphatase inhibitor and incubated at 4 °C for 10 minutes with rotation. The sample was sonicated for 3 min (30 seconds on, 30 seconds off) and subjected to centrifugation (21,000g for 10 min at 4 °C). The supernatant was transferred and the protein concentration quantified by the Direct Detect Spectrometer as per manufacturer's instructions.

### ***2.5.2 SDS-PAGE***

30 µg of protein was denatured by heating at 80 °C for 10 min in NuPAGE LDS sample buffer (4X), NuPAGE Sample Reducing Agent (10x) and made up to 25 µL with RIPA buffer (multiplied 181 up as required). The samples were loaded onto a 4–12% Bis-Tris 1.0 mm pre-cast polyacrylamide gel (12 µL loaded onto 12 well, 10 µL loaded onto 15 well) with a molecular weight ladder. With the MOPS running buffer, voltage was applied with at 60 V for 30 minutes followed by 120 V. The voltage was stopped once the dye front reached the bottom of the gel (≈90 minutes).

### ***2.5.3 Western blot preparation***

The proteins were transferred from the gel to a PVDF membrane using an iBlot2 gel transfer device using the pre-programmed P0 method. Following transfer, the membrane was washed sequentially in methanol, H<sub>2</sub>O and TBS-T (0.1% Tween-20 in TBS). The membrane was blocked with 5% milk in TBS for 1 h at room temperature and then incubated with primary antibody in 1% milk in TBS-T overnight at

4 °C. The membrane was then washed three times for 5 min with TBS-T and incubated with secondary antibody in 1% milk in TBS-T for 1 hr at room temperature. The membrane was washed three times for 5 min with TBS-T washed once with TBS for 5 minutes and then imaged using the LiCor CLx or LiCor Odyssey. Protein quantification was performed by densitometry using Image Studio analysis software (LI-COR Biosciences).

### 2.5.4 Western blot results

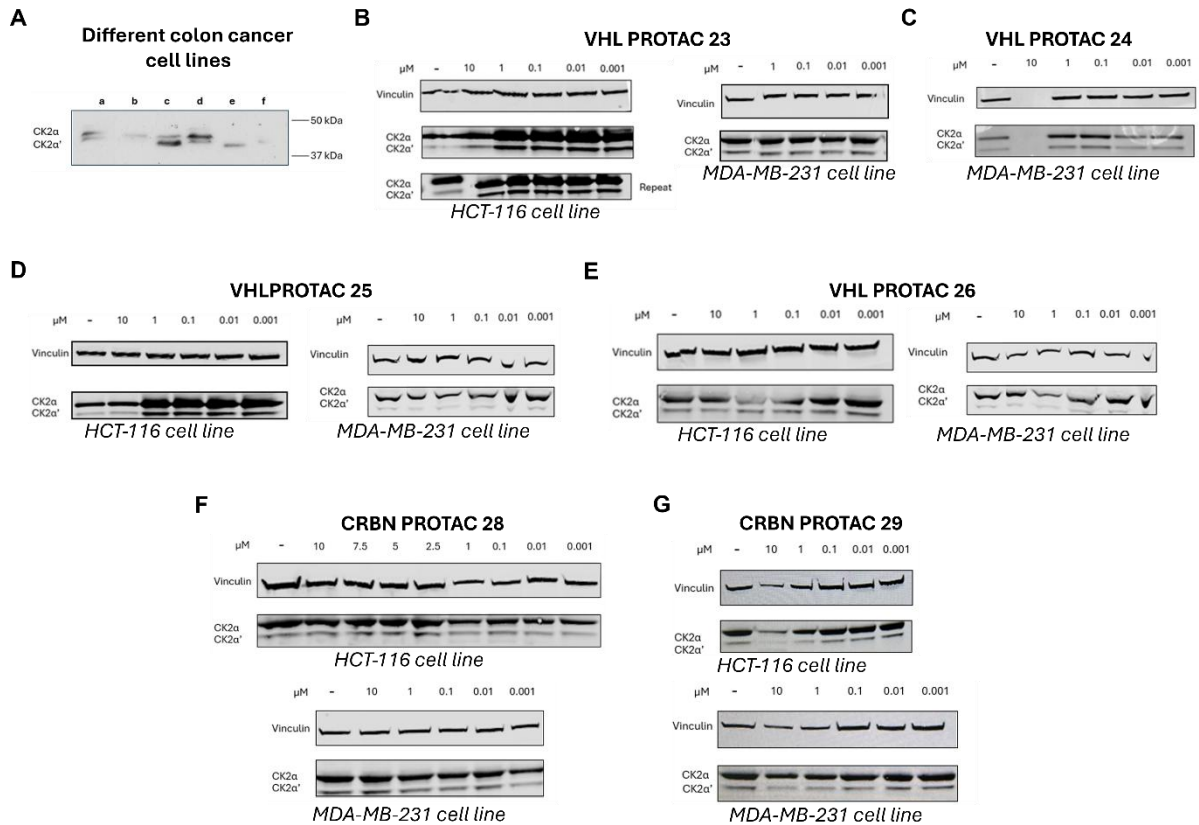

**Figure S2:** Results of Western blot assays carried out with the PROTACs to determine their ability to degrade CK2α. Panel **A** shows the Western blot analysis on six different colon cancer cell lines, which are as follows: **a:** LoVo; **b:** HT29; **c:** RKO; **d:** HCT-116; **e:** DLD-1; **f:** SW-480; Panels **B – G** show the Western blot analysis of the HCT-116 and MDA-MB-231 cell lines treated with the VHL and CRBN PROTACs. The cells were treated for 24h in a concentration dependent assay. 0.1% DMSO was used as a control.

### 2.5.5 Uncropped Western blots

- **Different colon cancer cell lines**

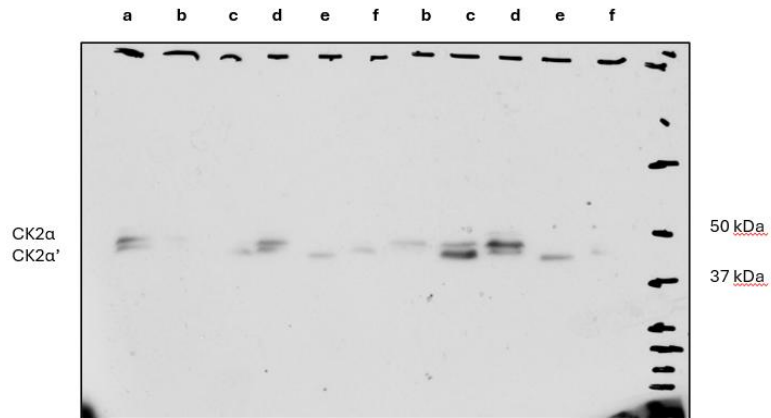

- **VHL PROTAC 23 with HCT-116 cell line**

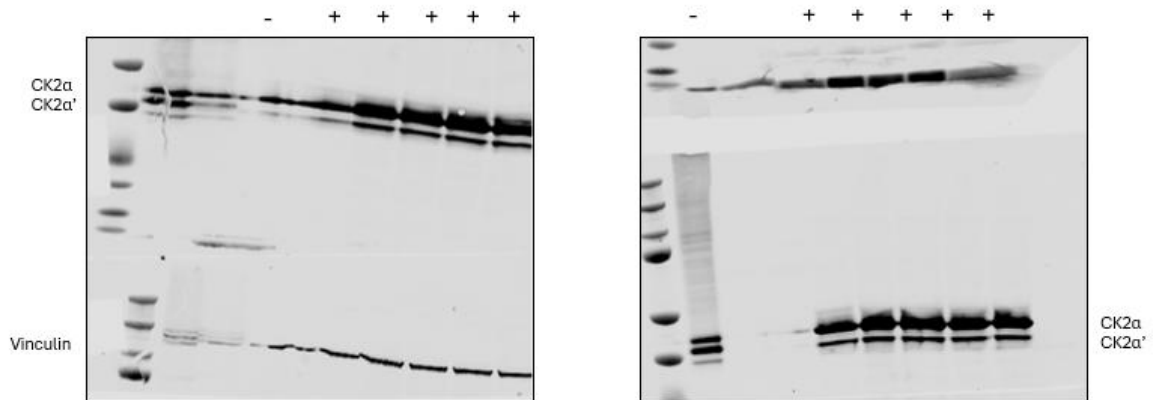

- **VHL PROTAC 25 with HCT-116 cell line**

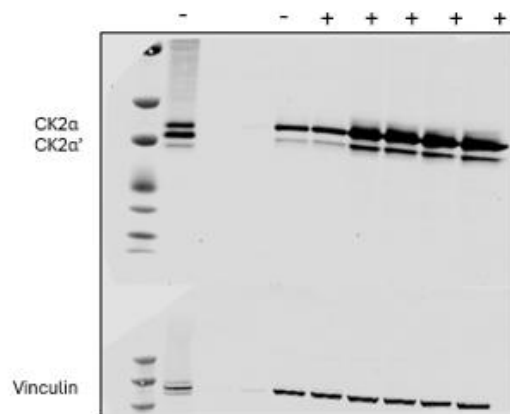

▪ **VHL PROTAC 26 with HCT-116 cell line**

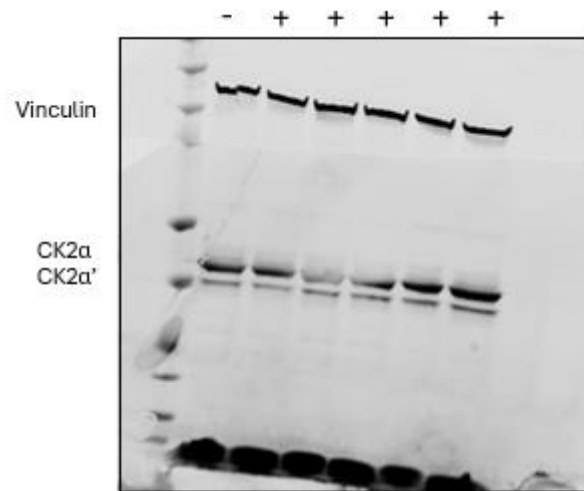

▪ **CRBN PROTAC 28 with HCT-116 cell line**

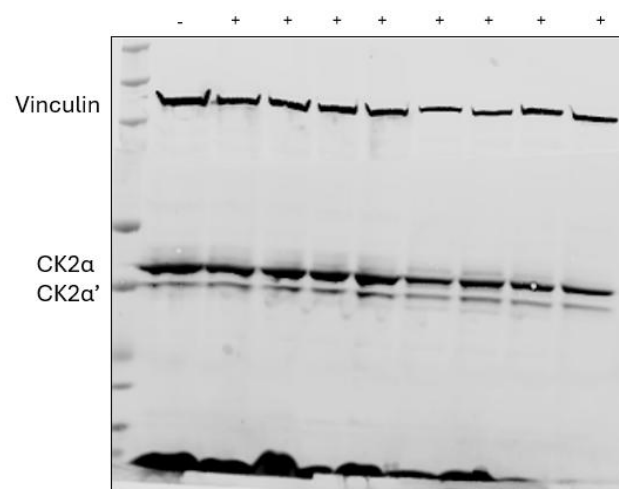

▪ **CRBN PROTAC 29 with HCT-116 cell line**

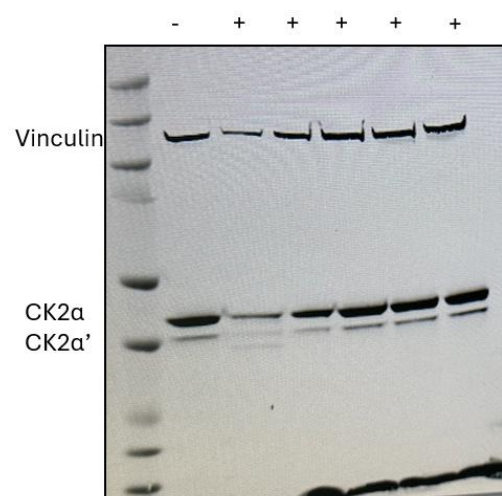

- **VHL PROTAC 23 and CRBN PROTAC 28 in MDA-MB-231 cell line**

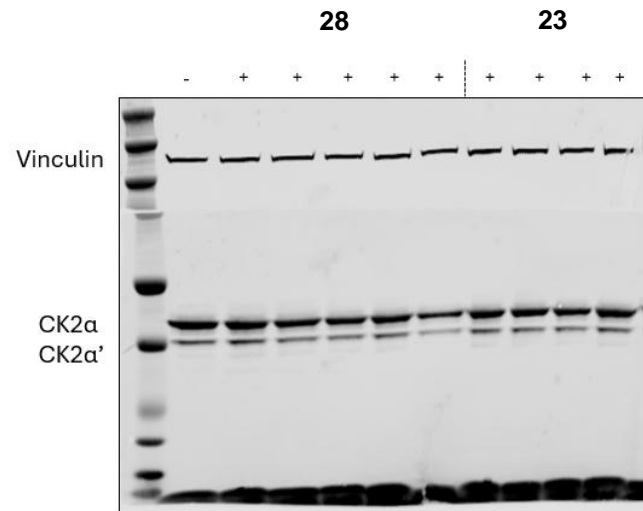

- **VHL PROTAC 24 with MDA-MB-23 cell line**

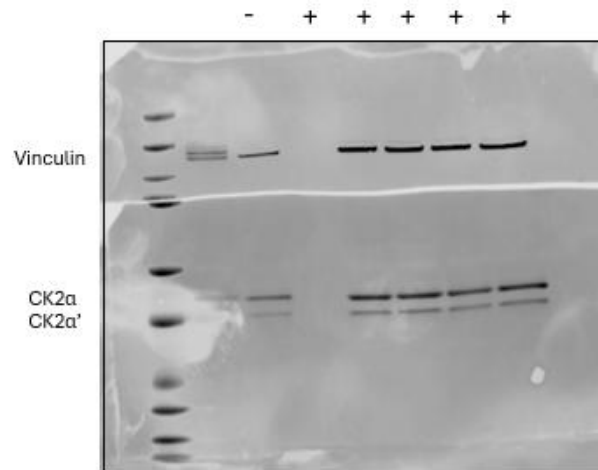

- **VHL PROTACs 25 and 26 with MDA-MB-23 cell line**

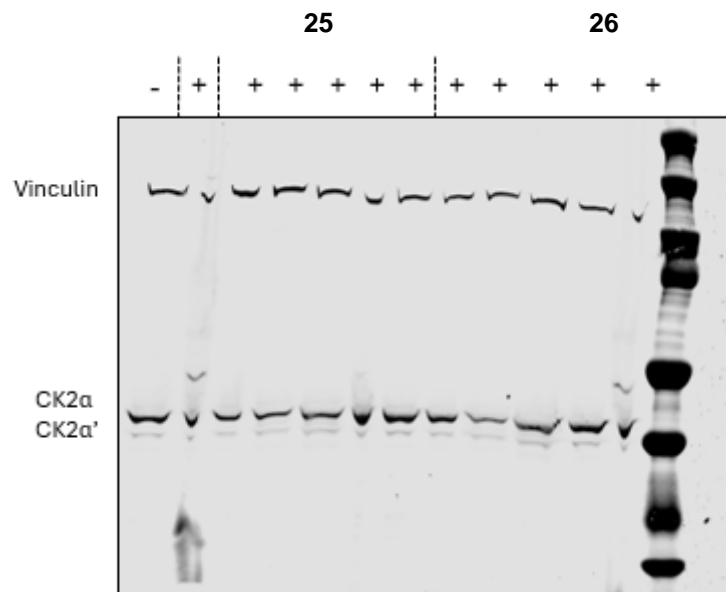

▪ **CRBN PROTAC 29 with MDA-MB-23 cell line**

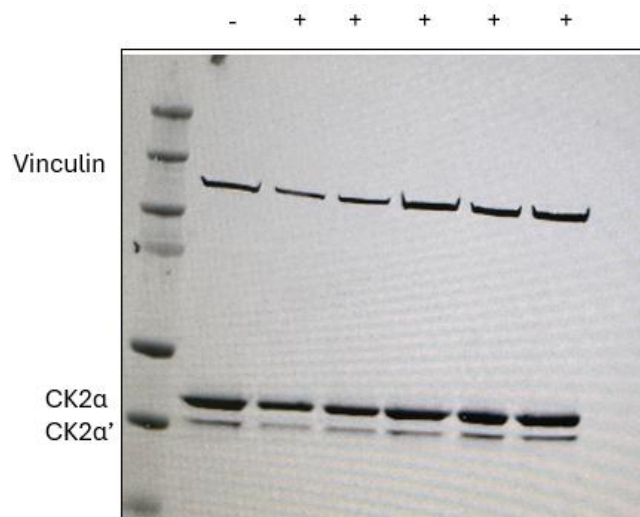

## 2.6 Sources of antibodies and reagents used

| Antibodies                                                               | Source            | Catalogue#  | Dilution |
|--------------------------------------------------------------------------|-------------------|-------------|----------|
| Rabbit anti-CK2α/α'                                                      | Cell Signaling    | 2656        | 1:1000   |
| Rabbit anti-Vinculin                                                     | Cell Signaling    | E1E9V       | 1:1000   |
| IR Dye 800CW donkey anti-rabbit                                          | LiCor Bio         | 926-32213   | 1:5000   |
| IR Dye 680RD goat anti-rabbit                                            | LiCor Bio         | 926-68071   | 1:5000   |
| Reagents                                                                 | Source            | Catalogue#  | Dilution |
| RIPA-Buffer (Pierce)                                                     | Thermo Scientific | 89900       |          |
| Protease Inhibitor (Pierce complete EDTA-free protease inhibitor tablet) | Roche             | 11873580001 | 100x     |
| Phosphatase Inhibitor (HALT Phosphatase inhibitor cocktail)              | Thermo Scientific | 78427       | 100x     |
| NuPAGE LDS sample buffer                                                 | Invitrogen        | NP0007      | 4x       |
| NuPAGE sample reducing agent                                             | Invitrogen        | 11569166    | 10x      |
| Molecular weight ladder (Precision plus protein dual colour standard)    | Bio-Rad           | 1610374     |          |

|                                               |                 |          |      |
|-----------------------------------------------|-----------------|----------|------|
| 4-12% Bis-Tris 1.0 mm gel (12 well)           | NuPAGE          | NP0322   |      |
| 4-12% Bis-Tris 1.0 mm gel (15 well)           | NuPAGE          | NP0323   |      |
| MOPS running buffer                           | NuPAGE          | NP0001   | 20x  |
| iBlot 2 gel transfer device                   | Invitrogen      | NP0004   |      |
| PVDF membrane (iBlot 2 transfer stacks, PVDF) | Invitrogen      | IB24001  |      |
| Tris-buffered saline tablets                  | Sigma-Aldrich   | 12161700 |      |
| Tween-20 (10% Tween 20)                       | Bio-Rad         | 1610781  | 100x |
| Milk (skimmed milk powder)                    | Marvel Original |          |      |

---

### 3. References

- (1) Yilmaz, E.; Bier, D.; Guillory, X.; Briels, J.; Ruiz-Blanco, Y. B.; Sanchez-Garcia, E.; Ottmann, C.; Kaiser, M. *Chem. Eur. J.* **2018**, *24*, 13807–13814. doi:10.1002/chem.201801074
- (2) Budhadev, D.; Poole, E.; Nehlmeier, I.; Liu, Y.; Hooper, J.; Kalverda, E.; Akshath, U. S.; Hondow, N.; Turnbull, W. B.; Pöhlmann, S.; Guo, Y.; Zhou, D. *J. Am. Chem. Soc.* **2020**, *142*, 18022–18034. doi:10.1021/jacs.0c06793
- (3) Anabuki, T.; Tsukahara, M.; Matsuura, H.; Takahashi, K. *Biosci. Biotechnol. Biochem.* **2016**, *80*, 432–439. doi:10.1080/09168451.2015.1104240
- (4) Pokorski, J. K.; Breitenkamp, K.; Liepold, L. O.; Qazi, S.; Finn, M. G. *J. Am. Chem. Soc.* **2011**, *133*, 9242–9245. doi:10.1021/ja203286n
- (5) Yang, C.; Edsall, R.; Harris, H. A.; Zhang, X.; Manas, E. S.; Mewshaw, R. E. *Bioorg. Med. Chem.* **2004**, *12*, 2553–2570. doi:10.1016/j.bmc.2004.03.028
- (6) De Fusco, C.; Brear, P.; Iegre, J.; Georgiou, K. H.; Sore, H. F.; Hyvönen, M.; Spring, D. R. *Bioorg. Med. Chem.* **2017**, *25*, 3471–3482. doi:10.1016/j.bmc.2017.04.037
- (7) Steinebach, C.; Voell, S. A.; Vu, L. P.; Bricelj, A.; Sosič, I.; Schnakenburg, G.; Gütschow, M. *Synthesis* **2020**, *52*, 2521–2527. doi:10.1055/s-0040-1707400

## 4. Copies of NMR spectra

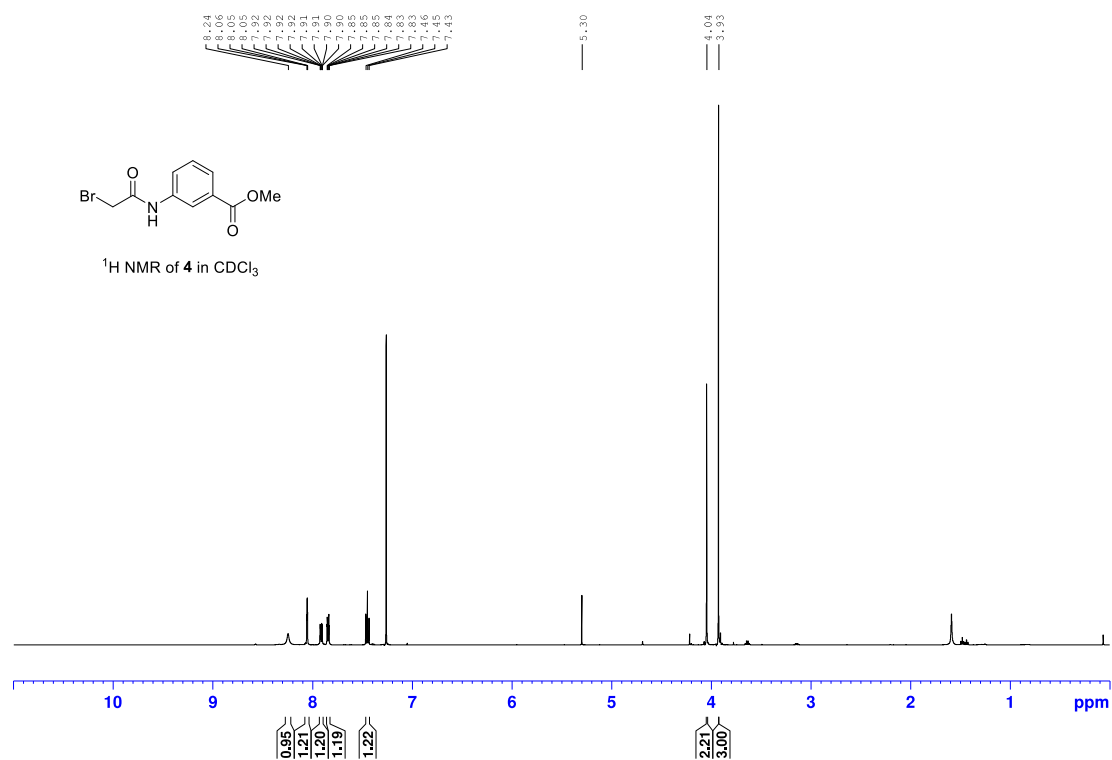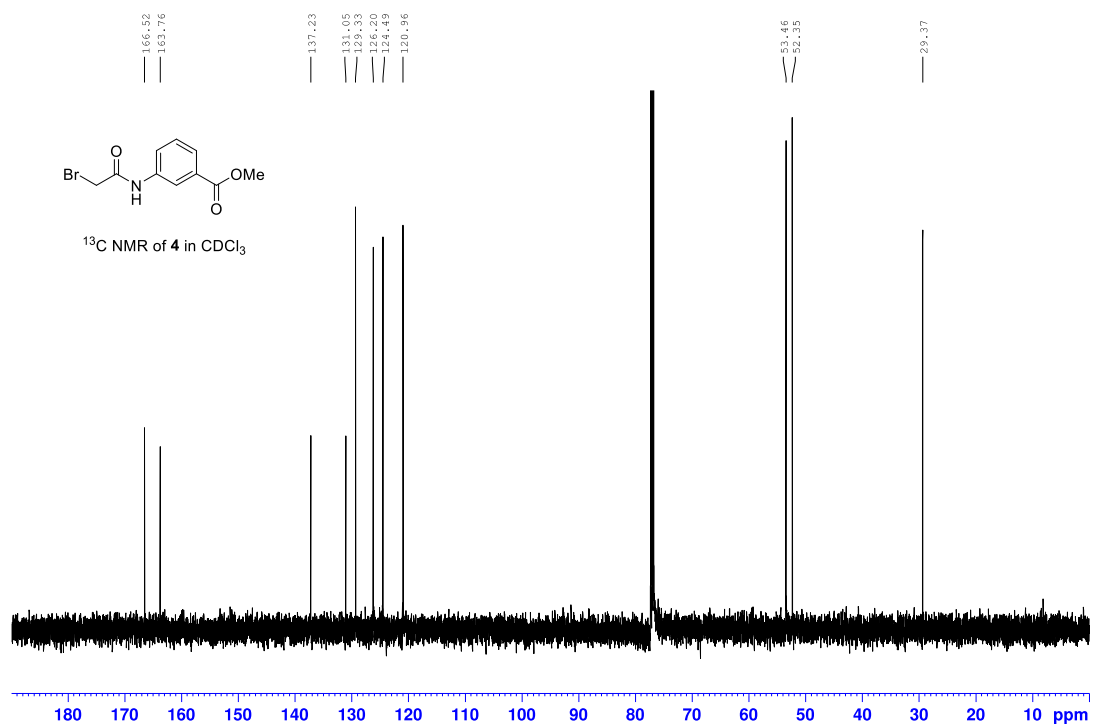

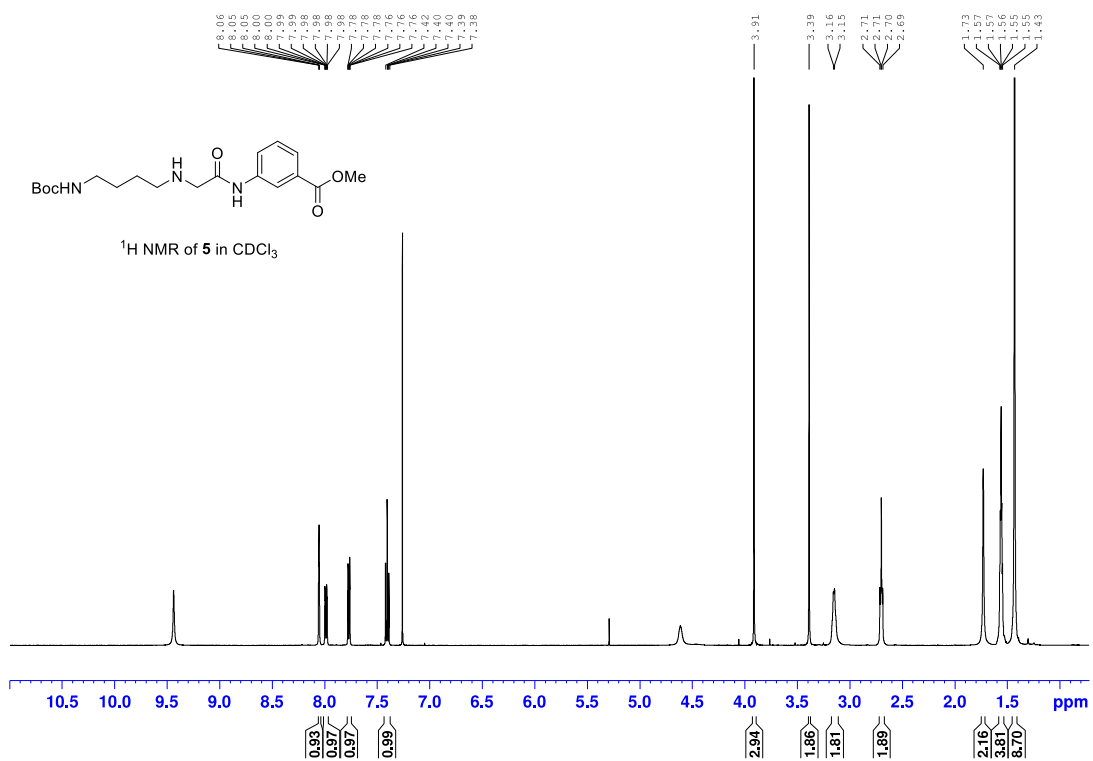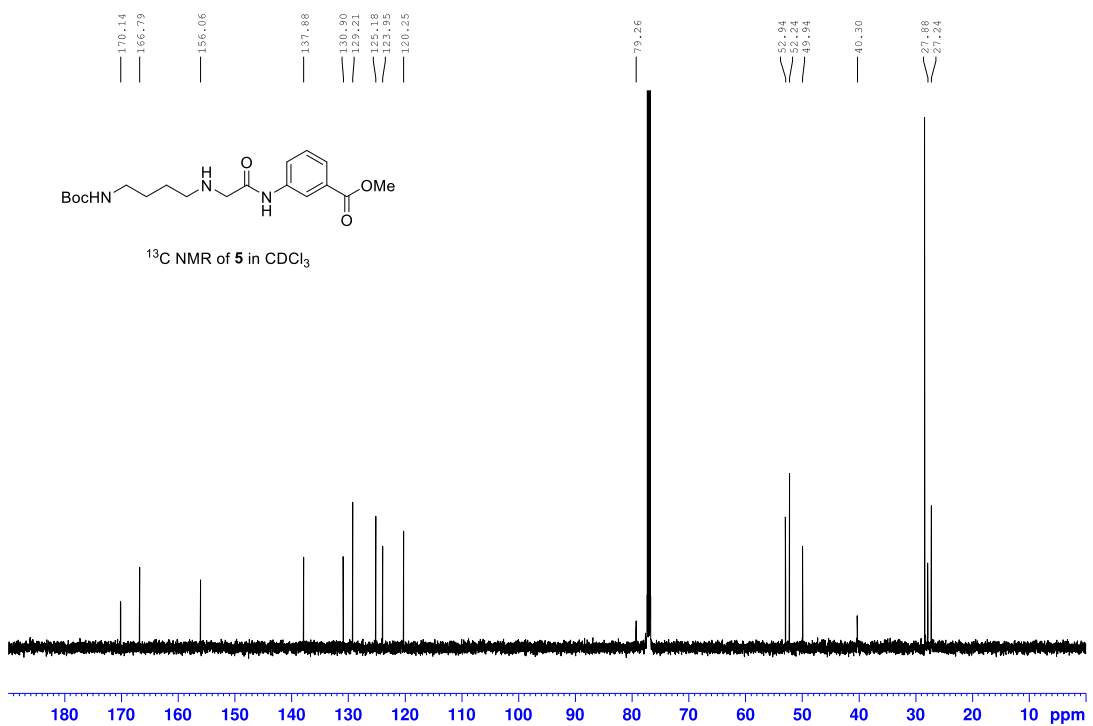

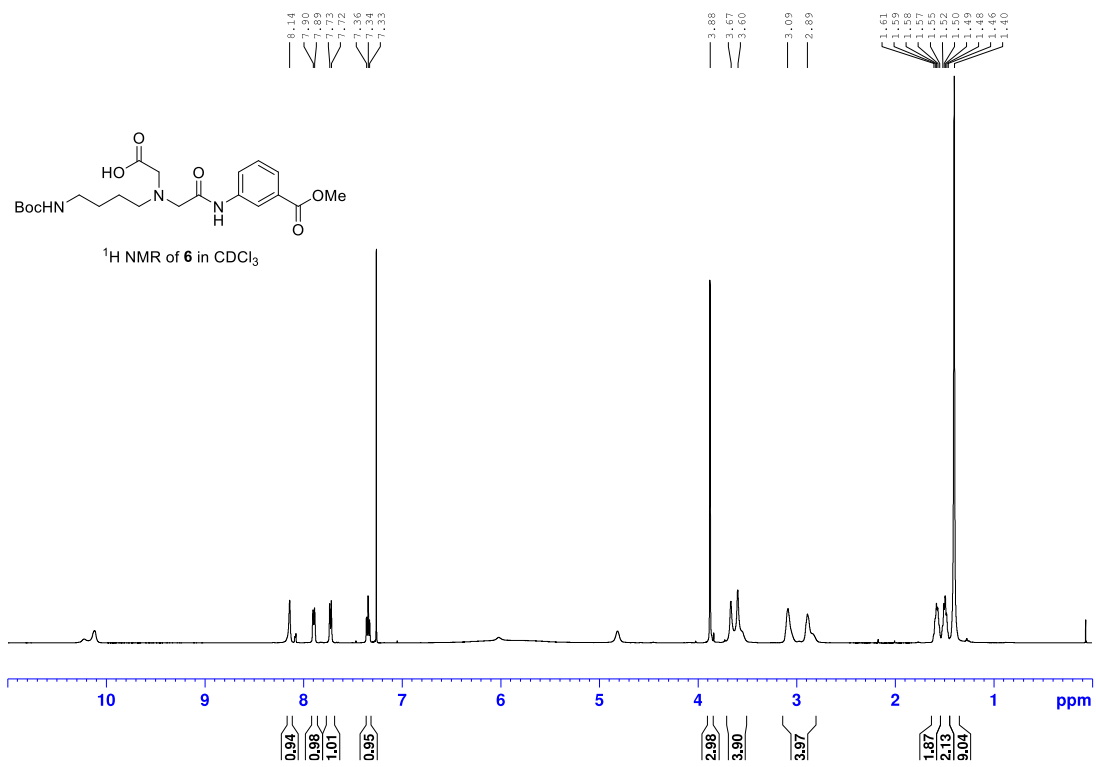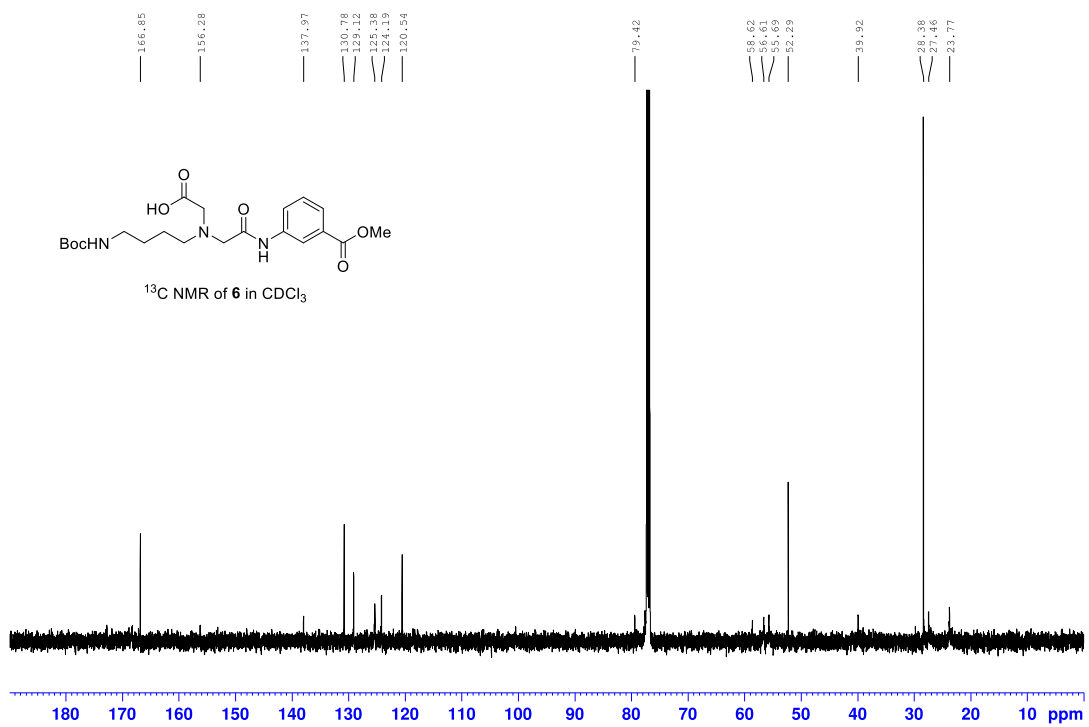

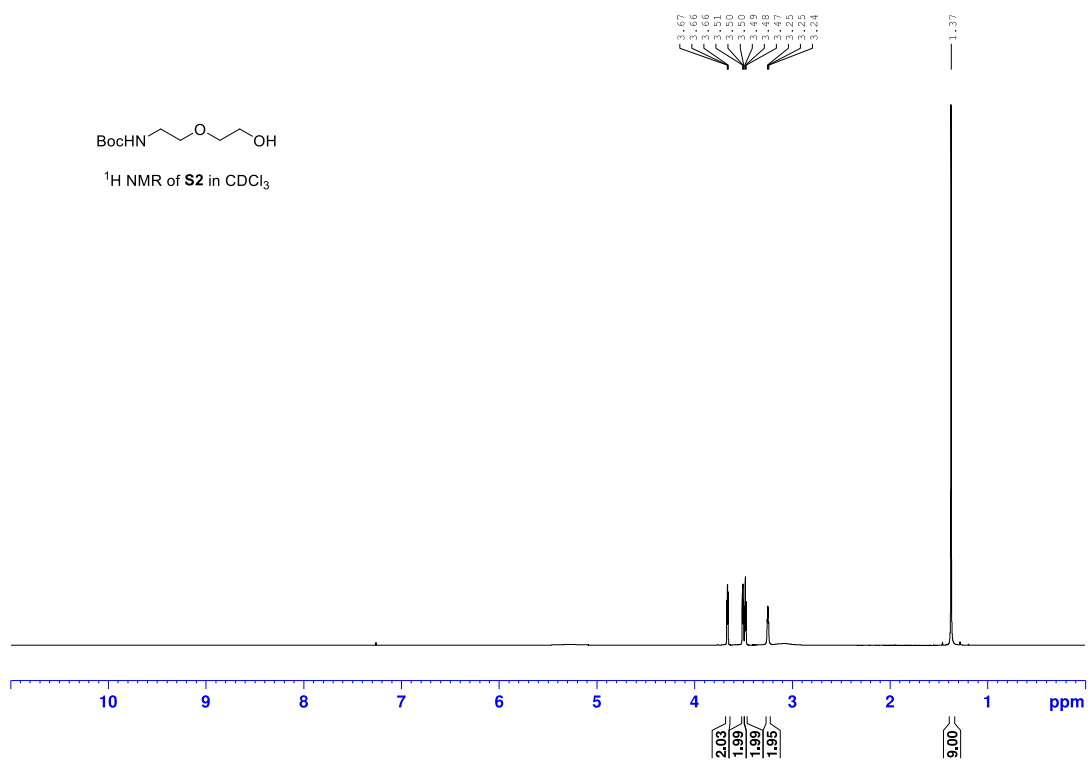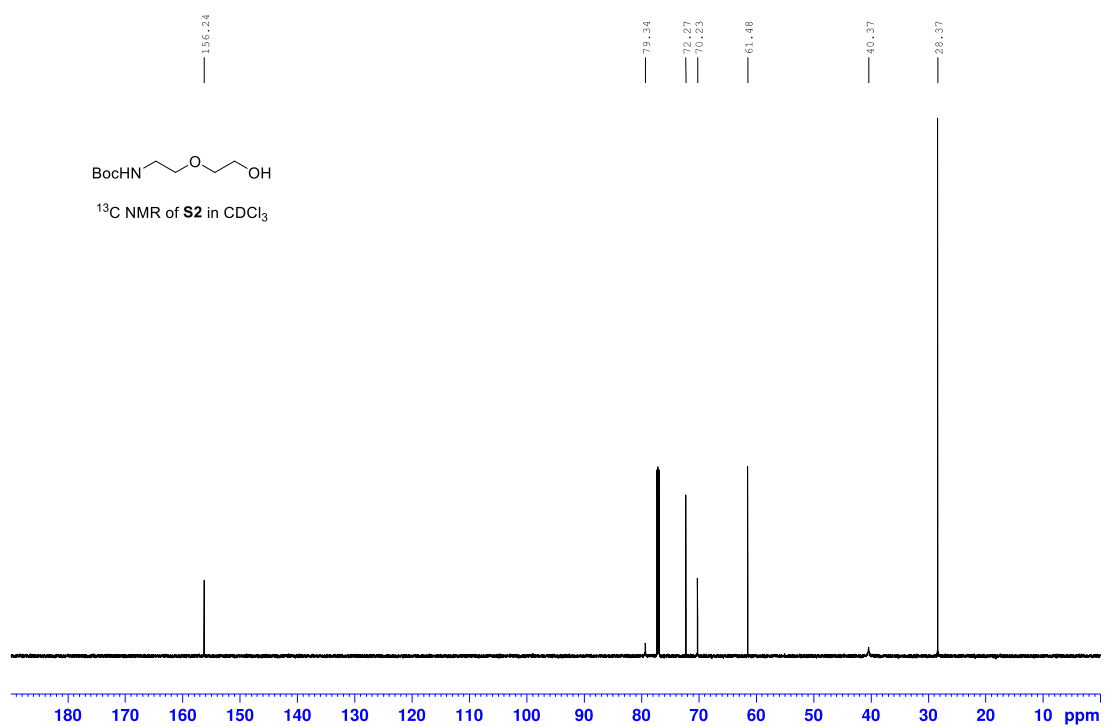

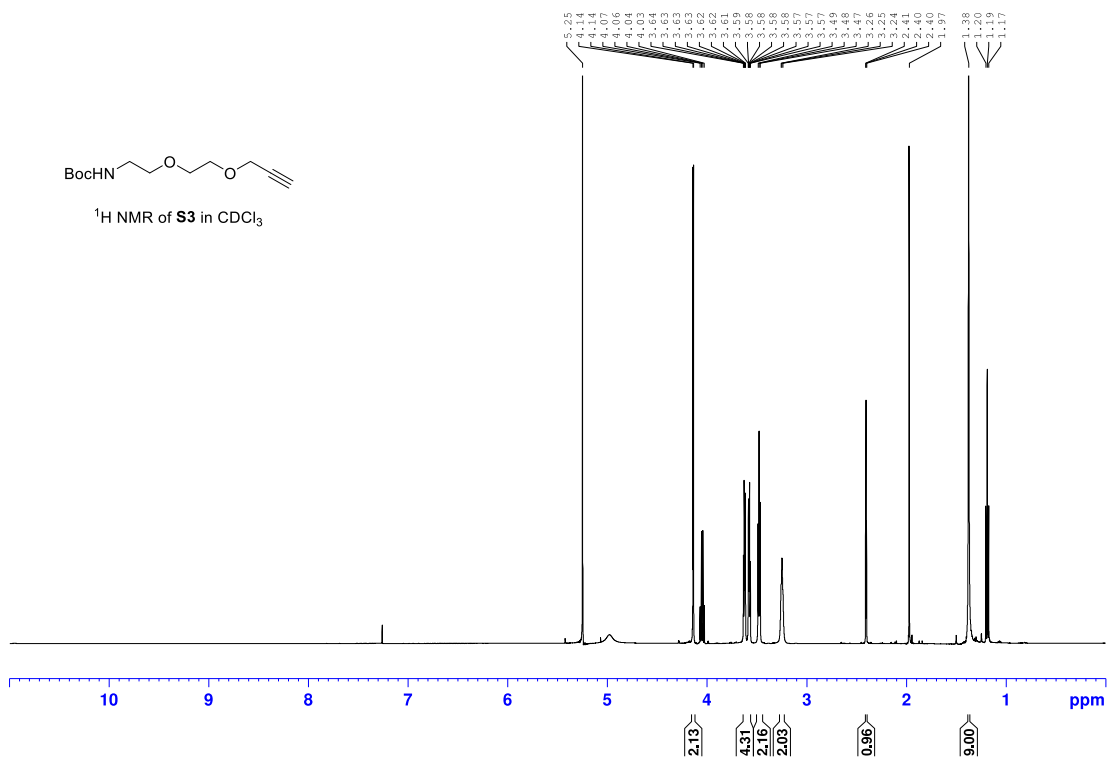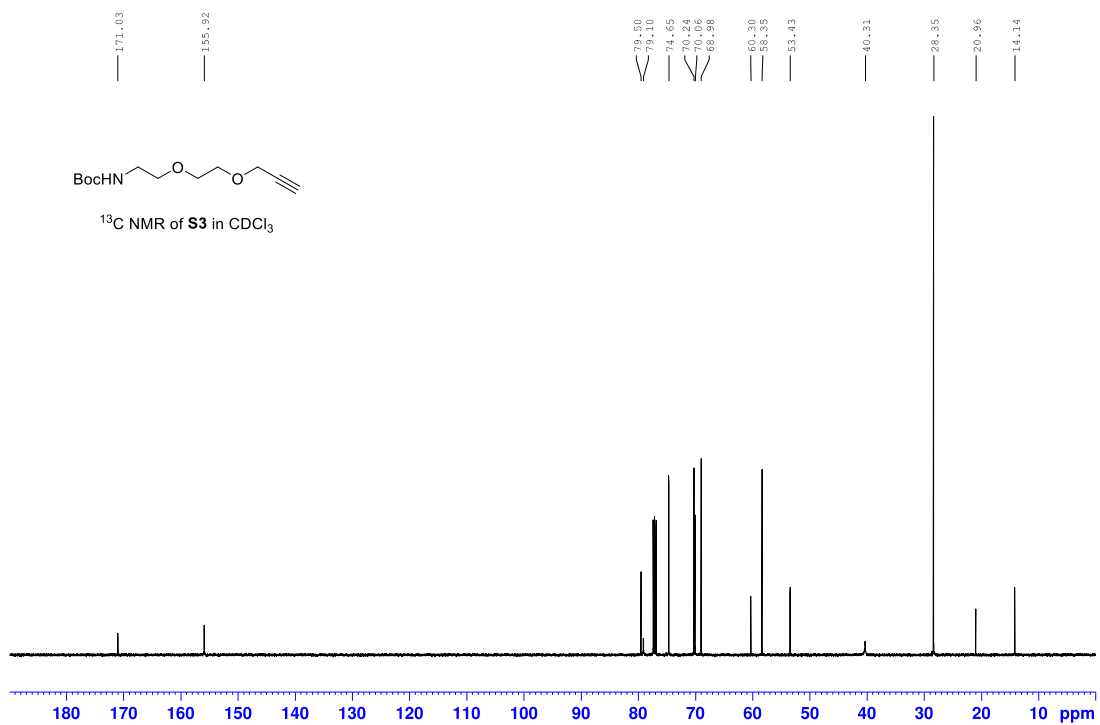



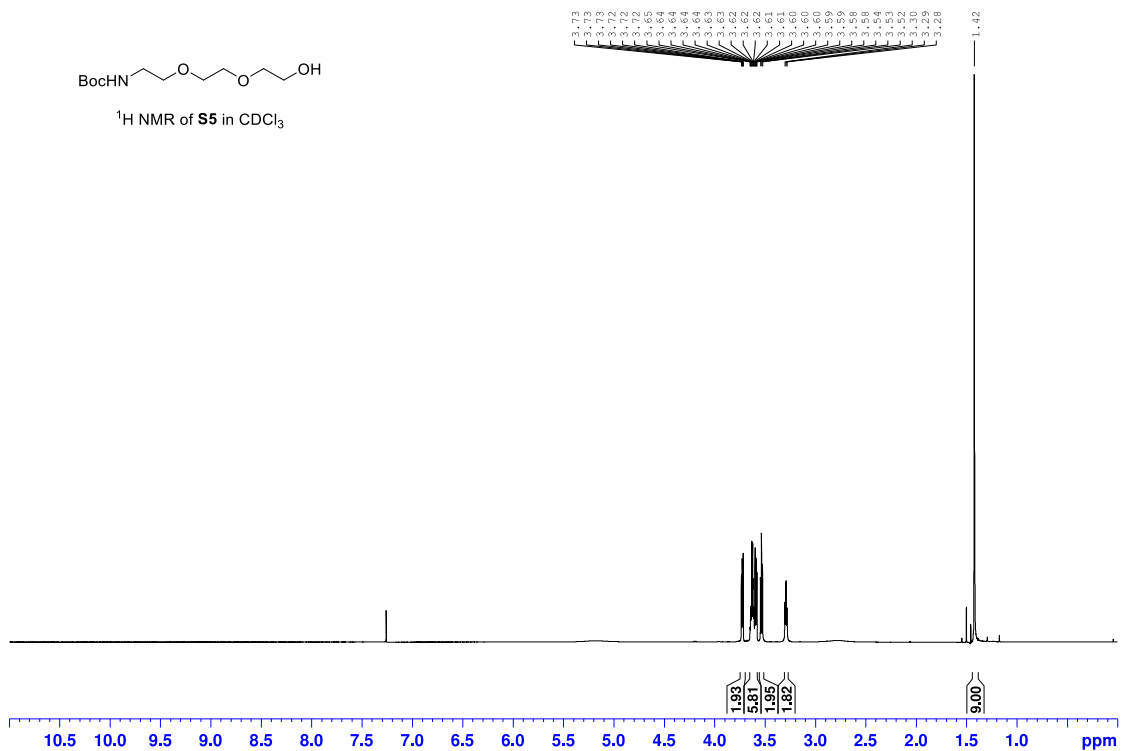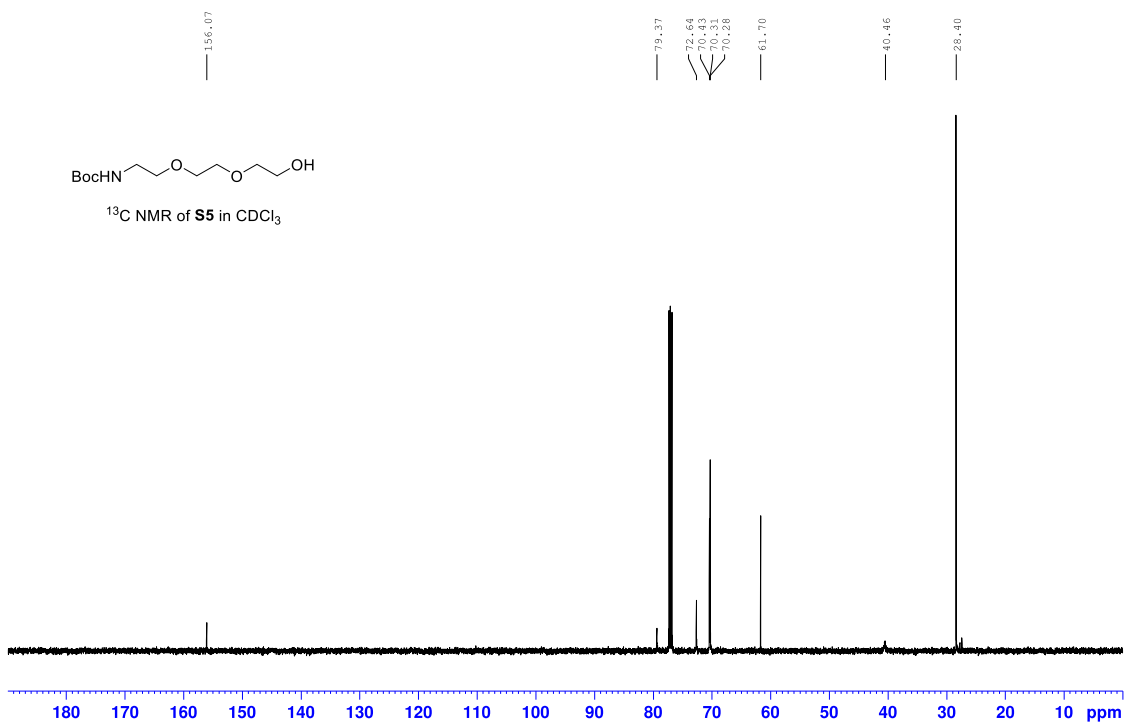

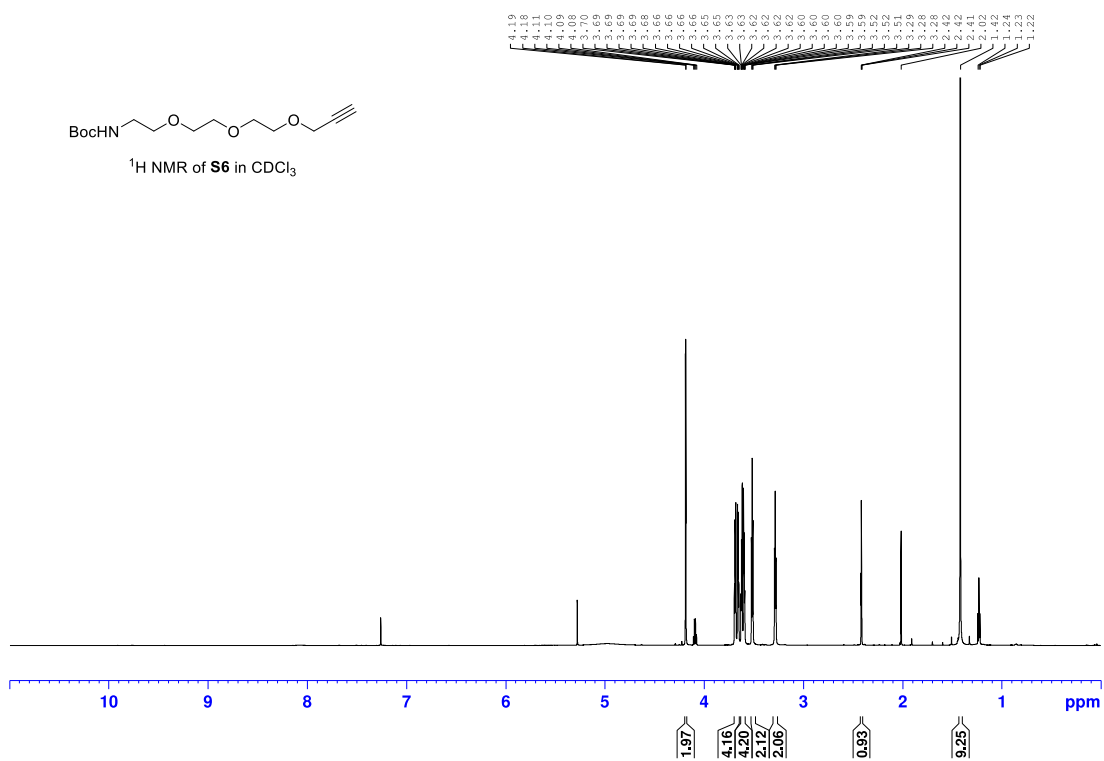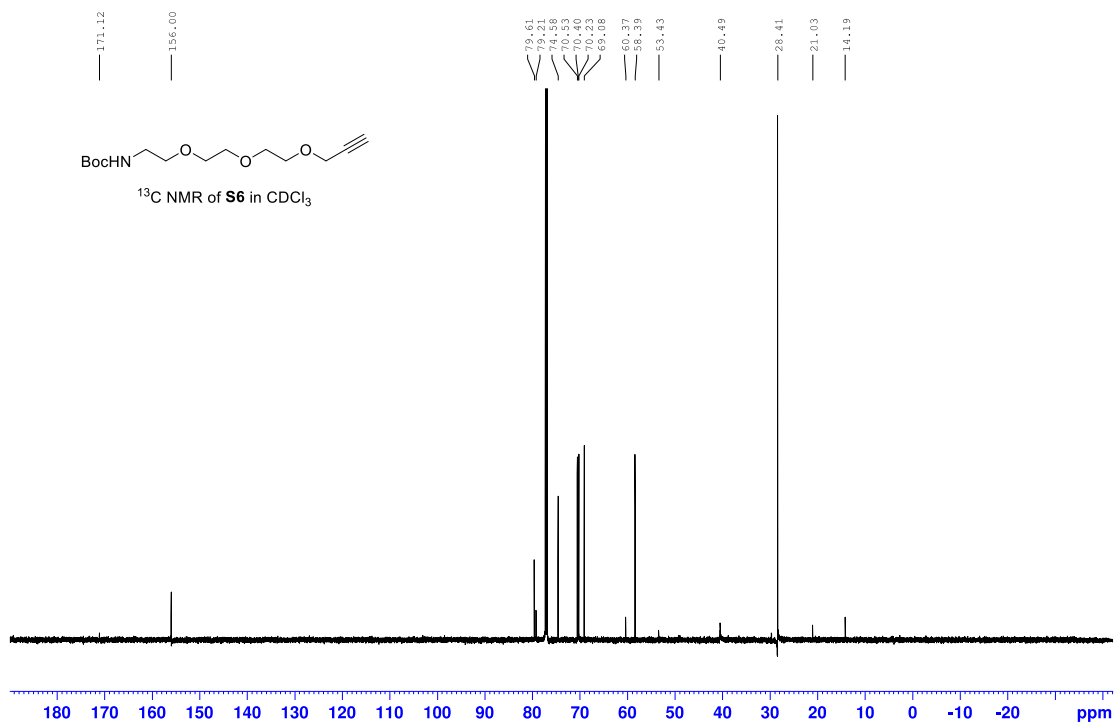

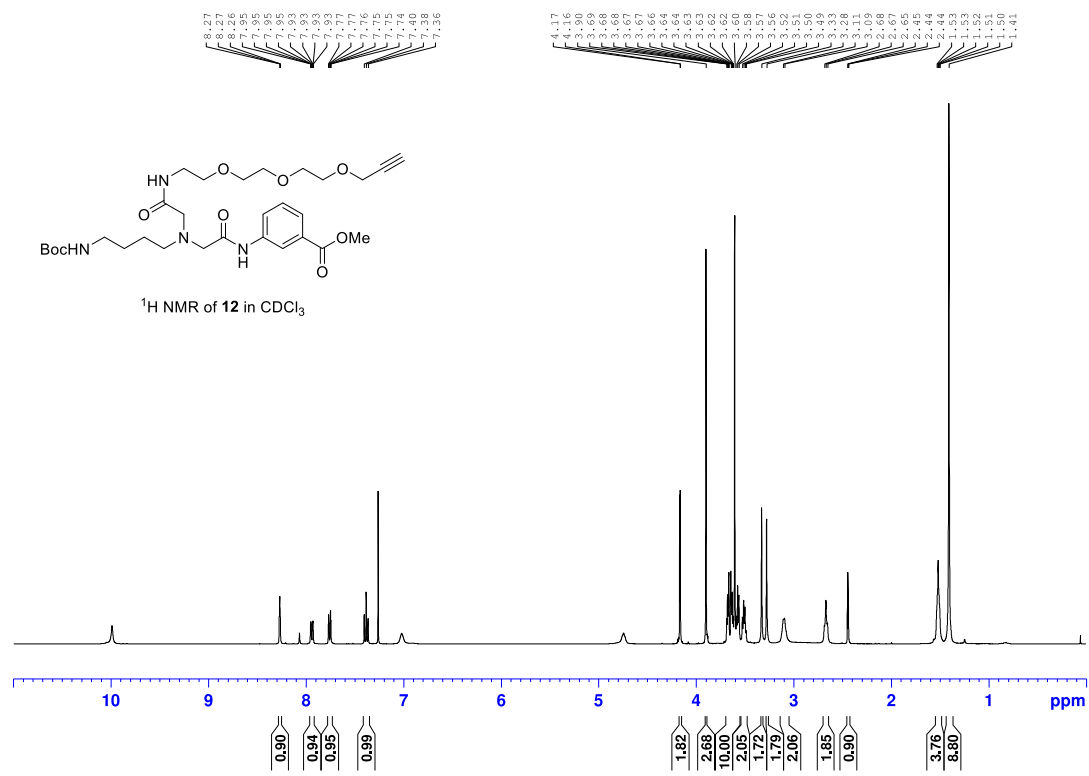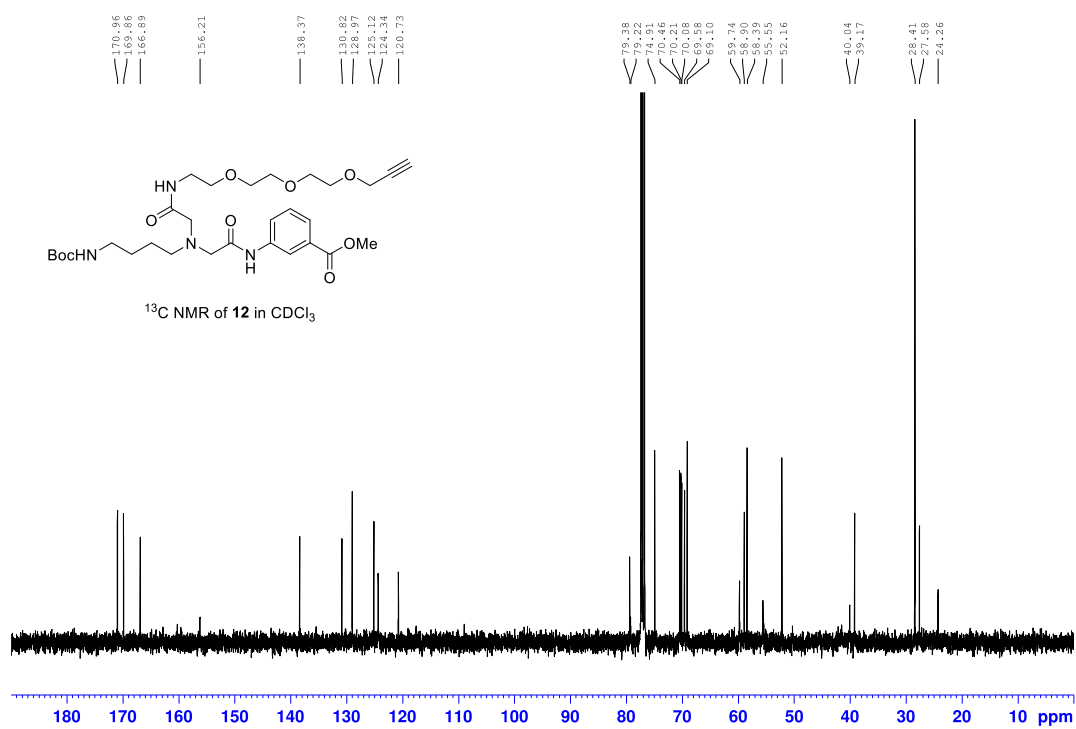







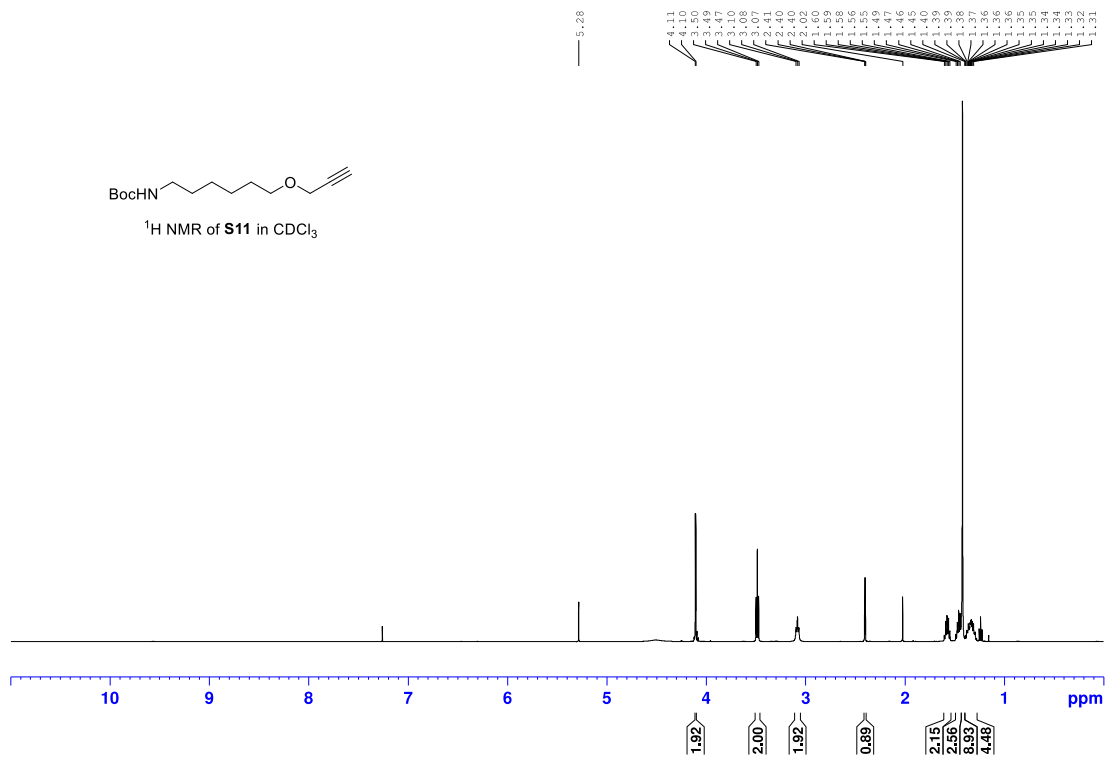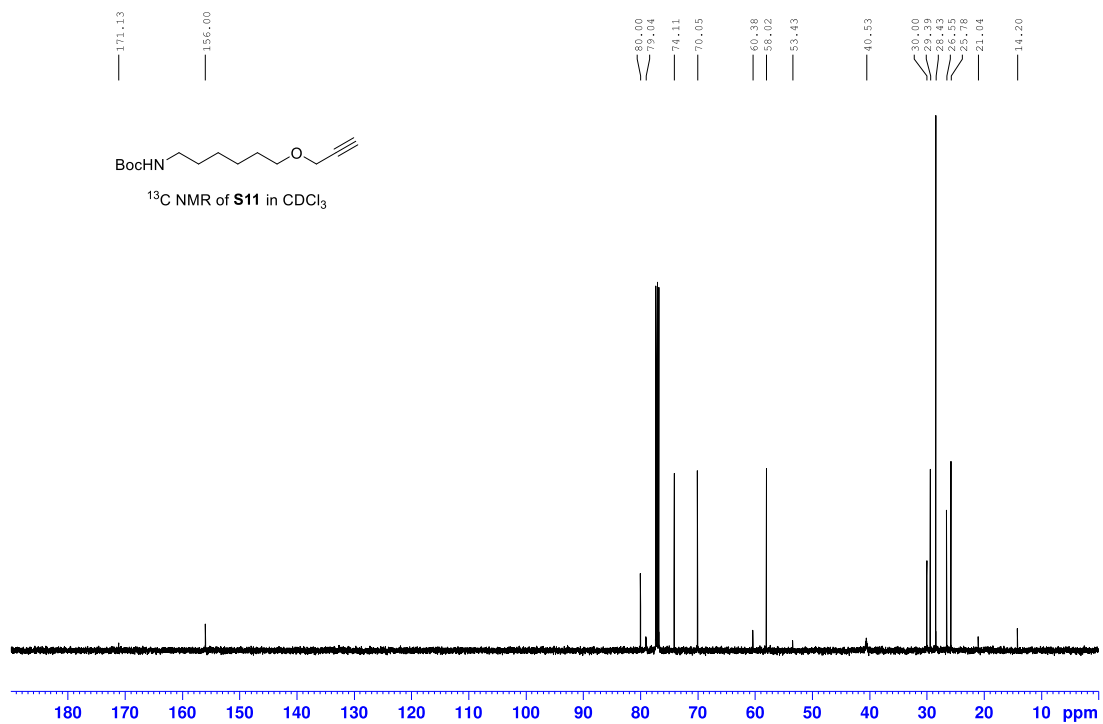

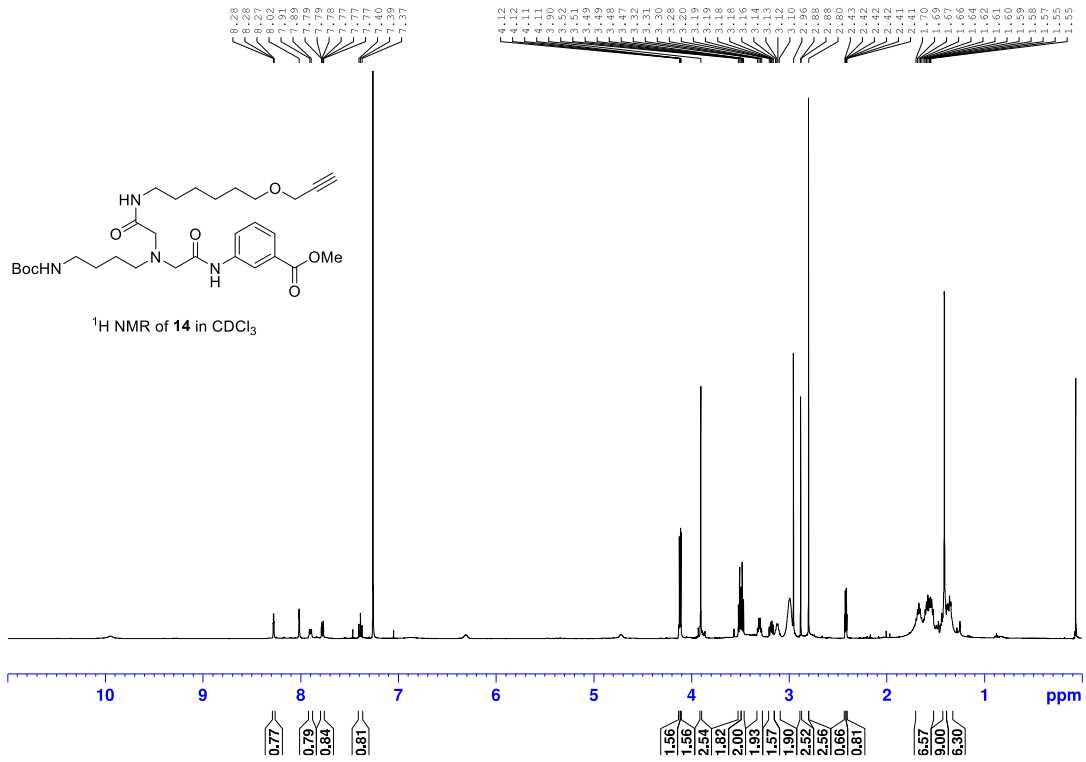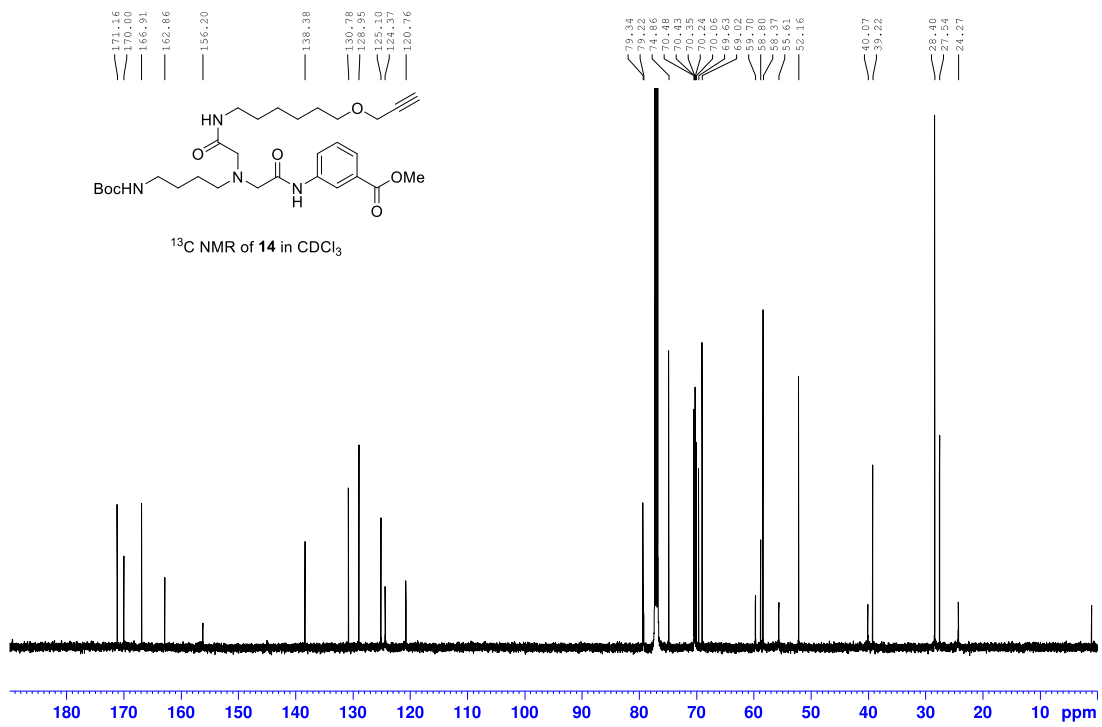

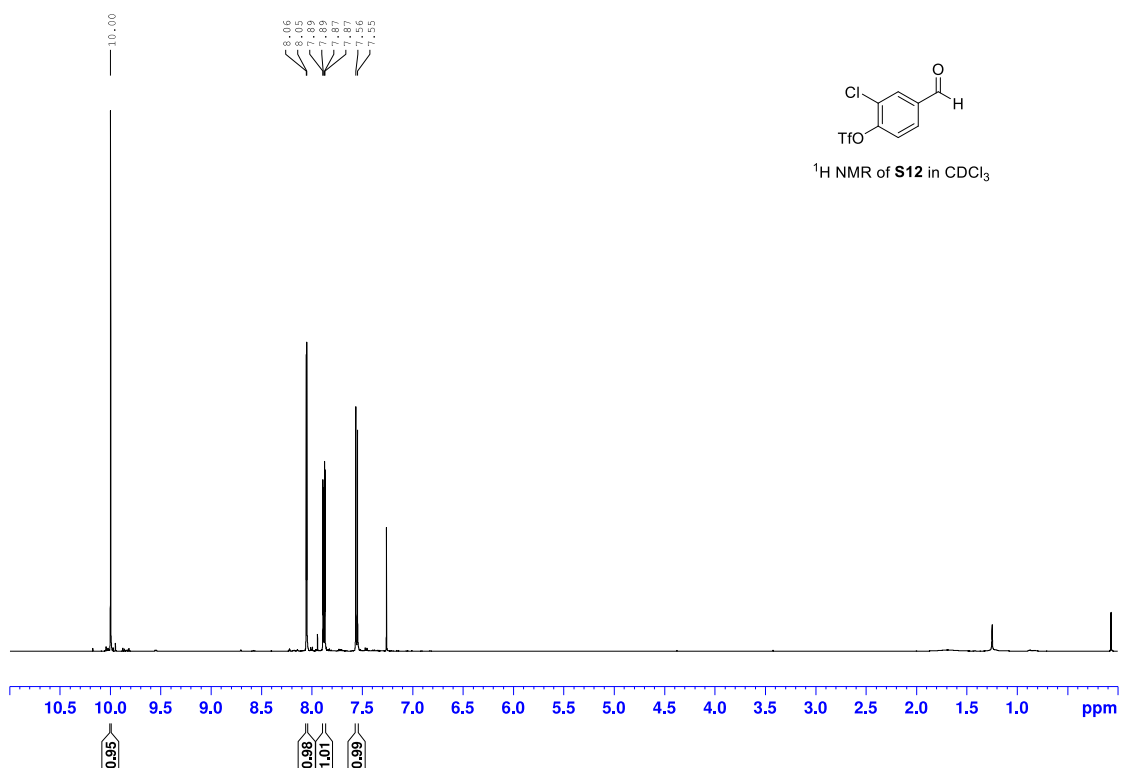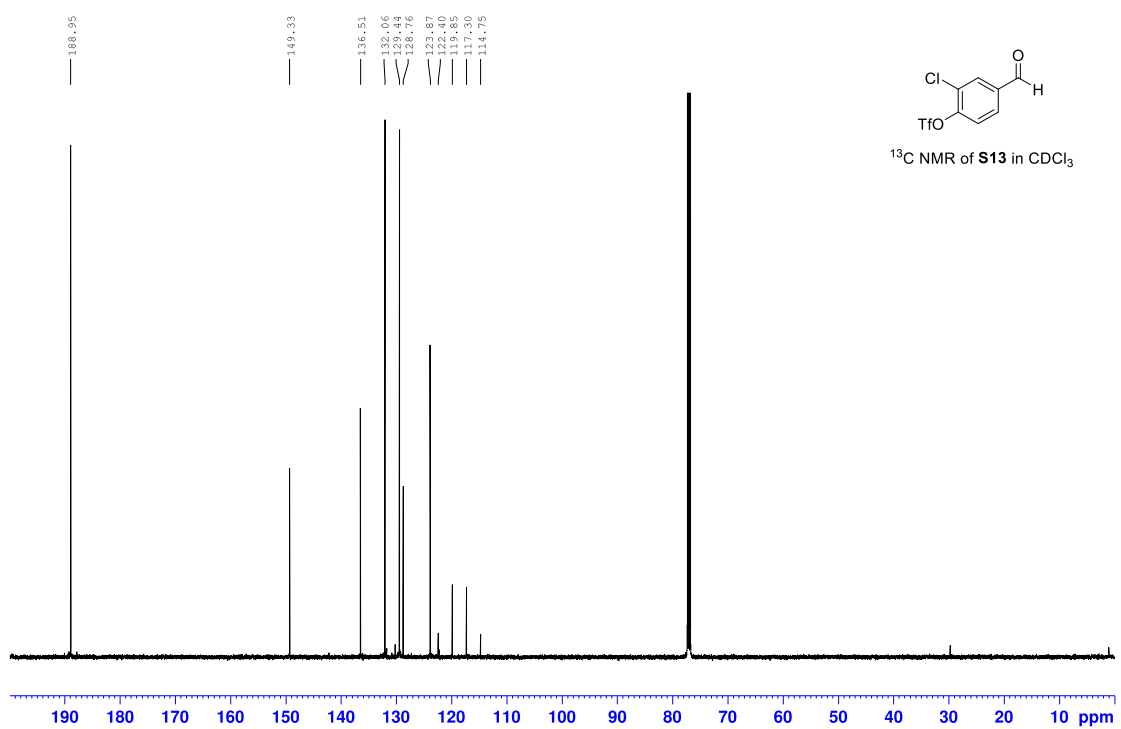

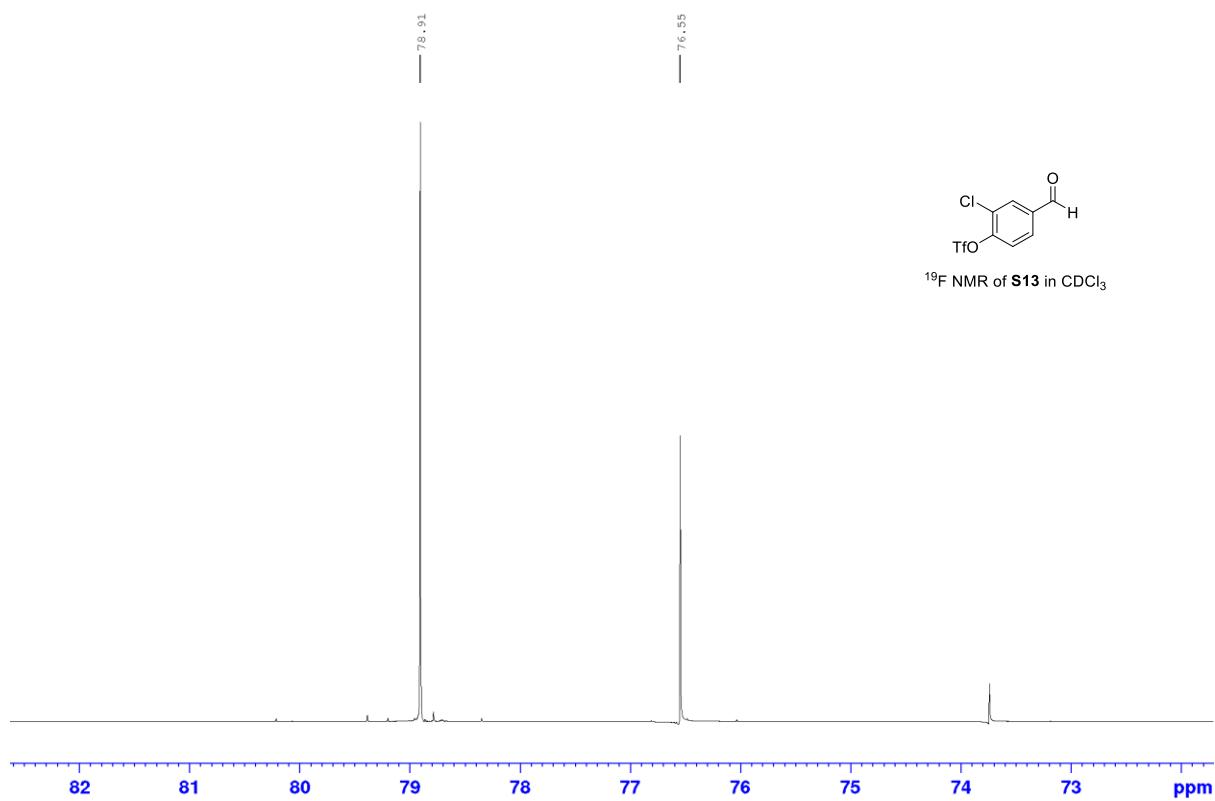

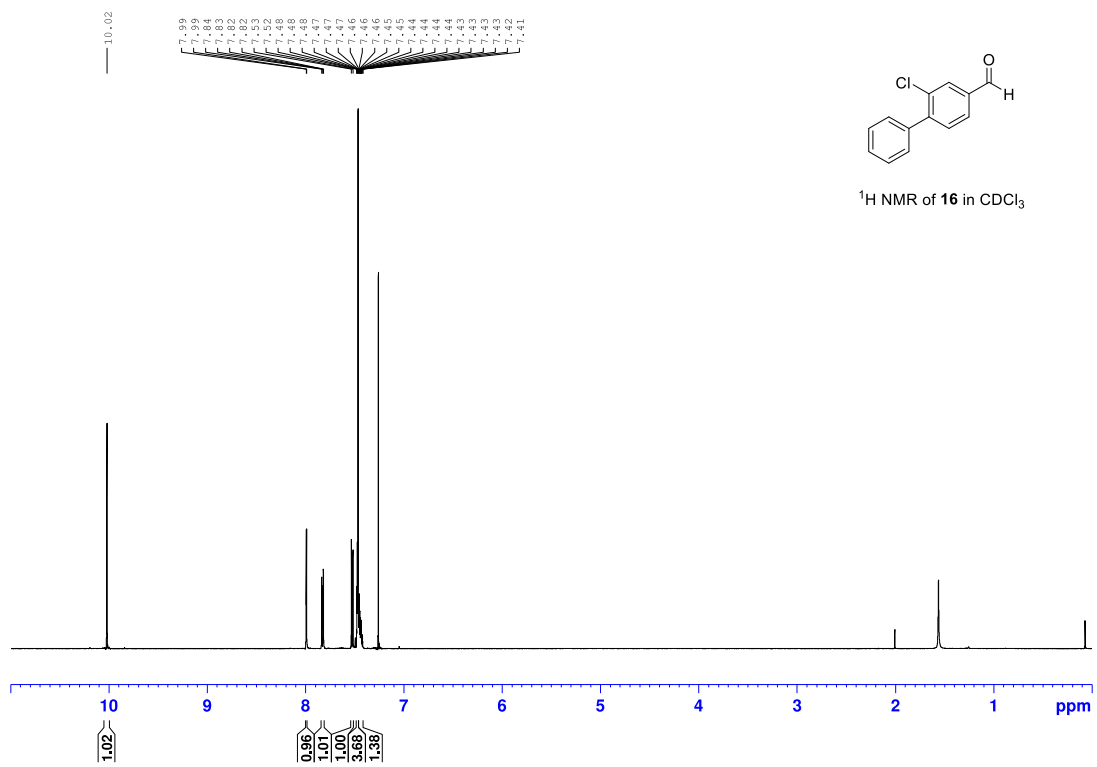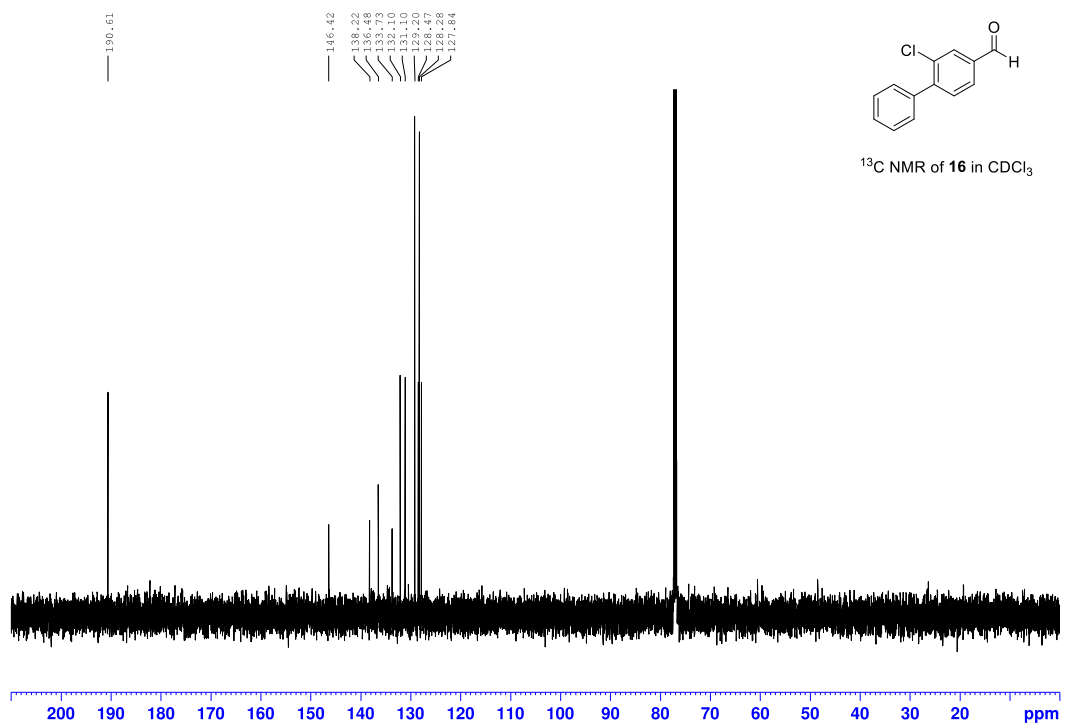



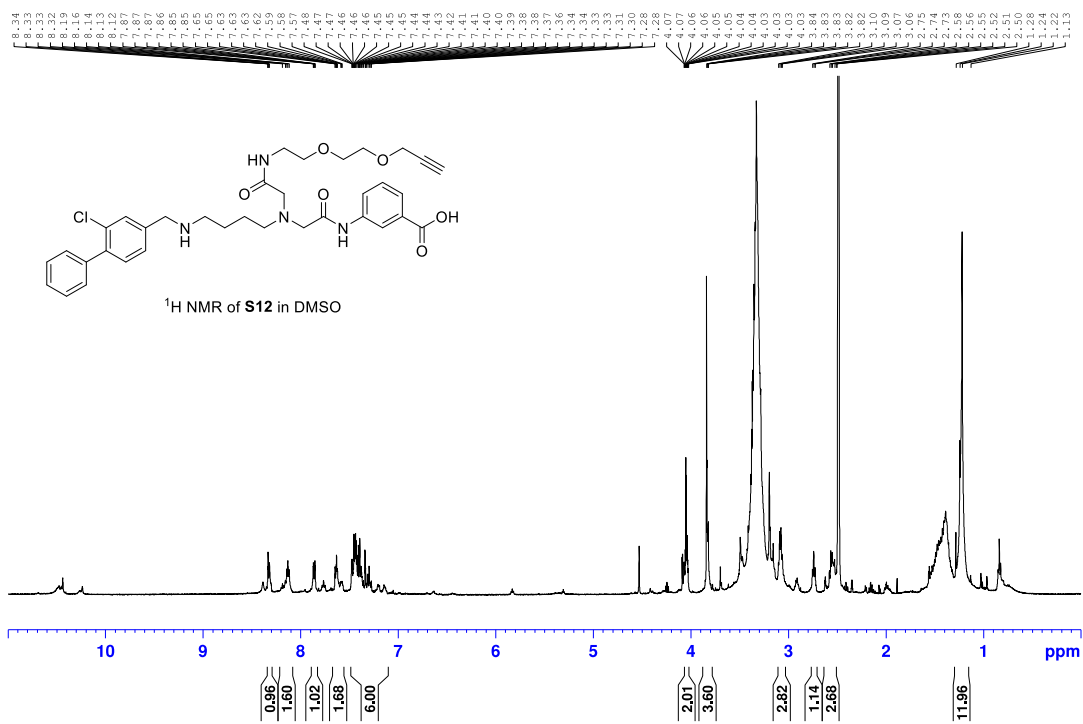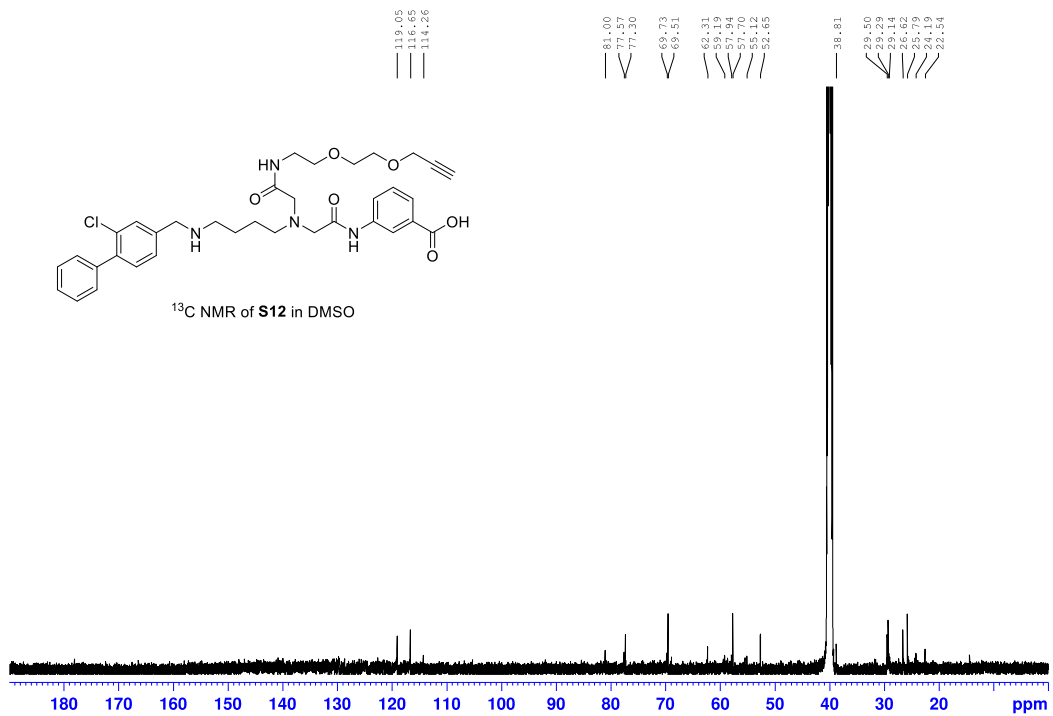





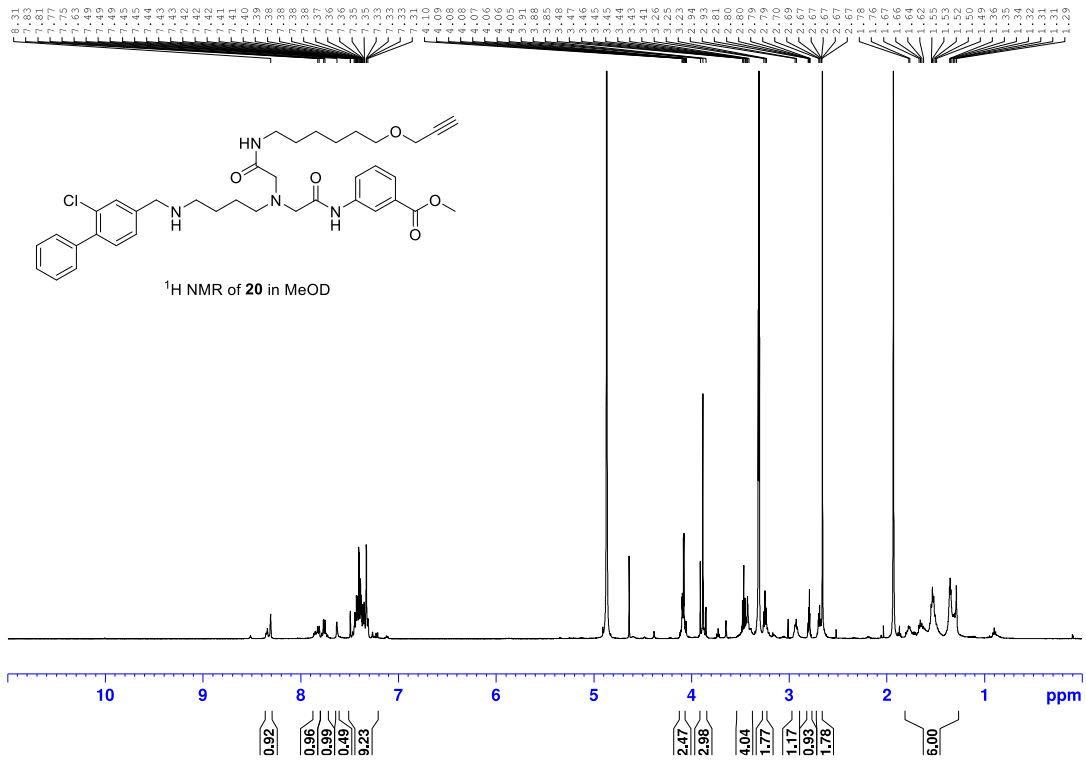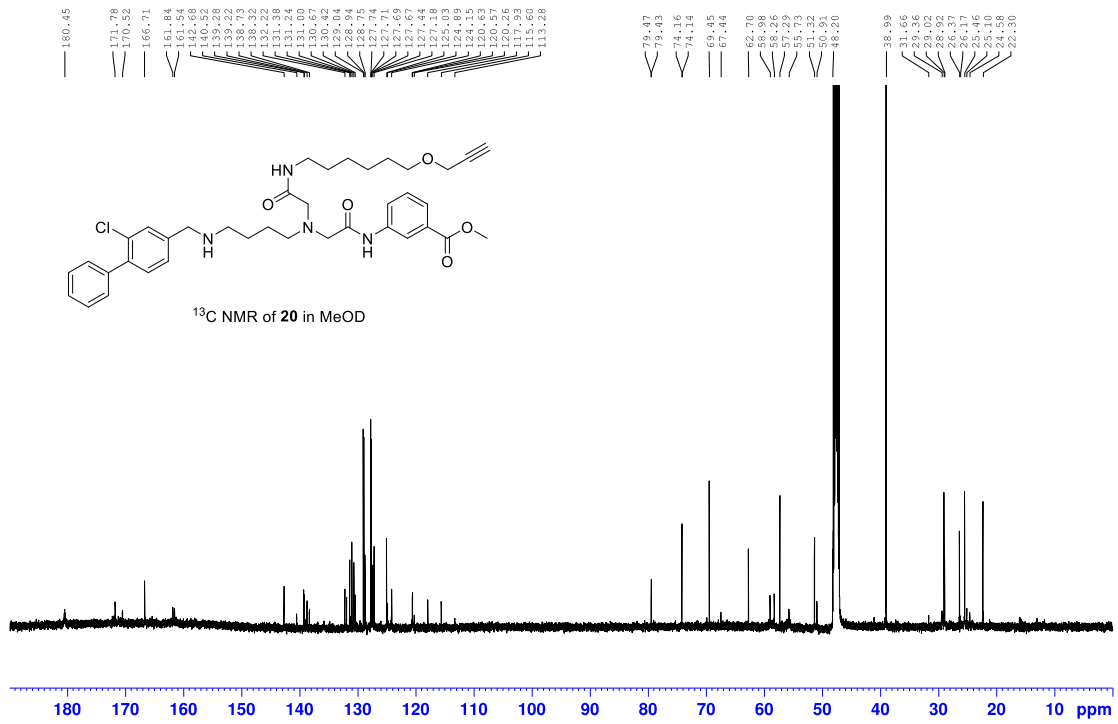

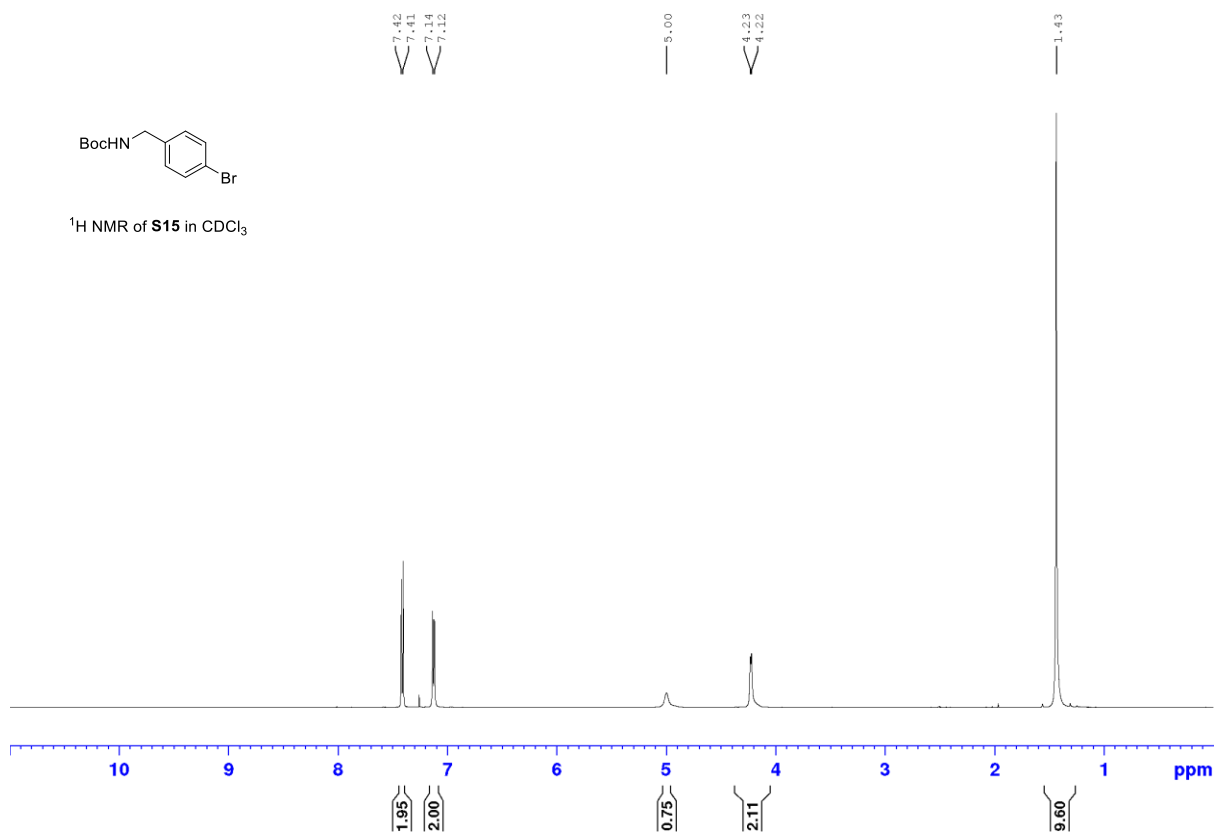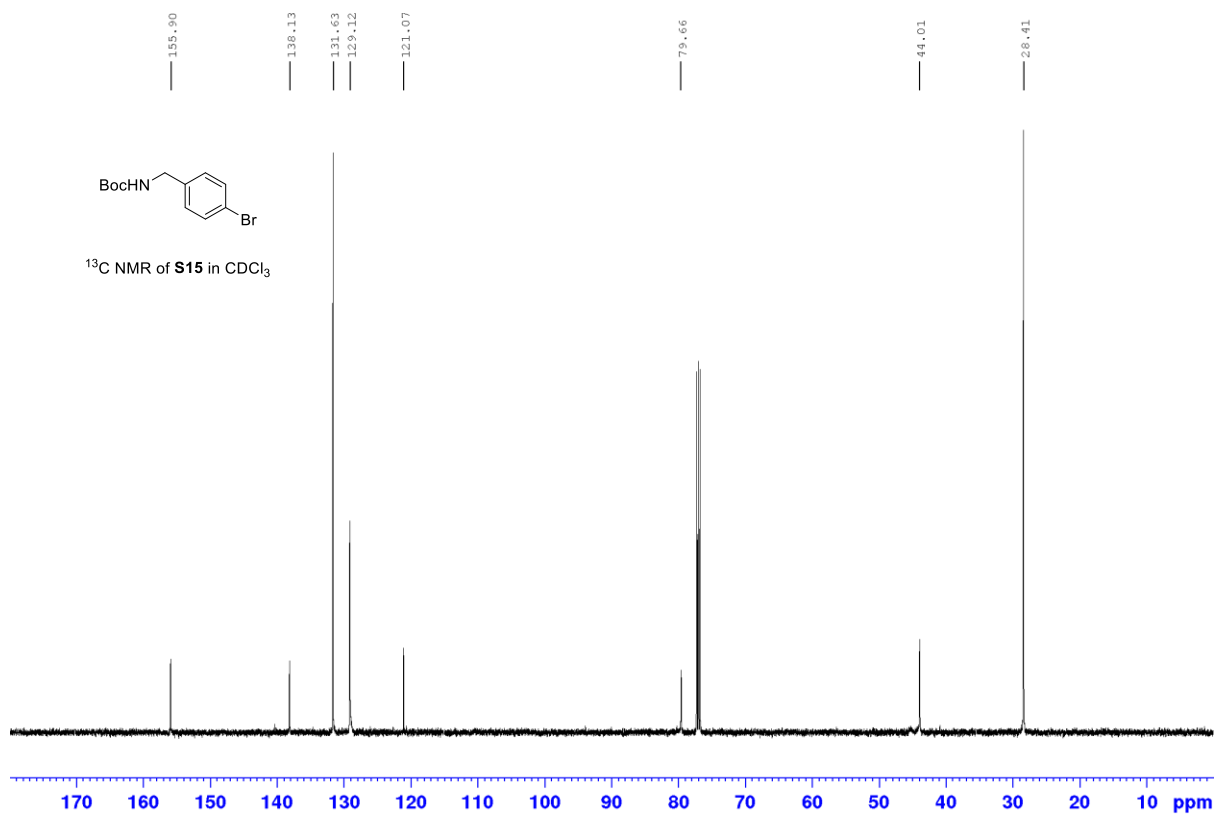

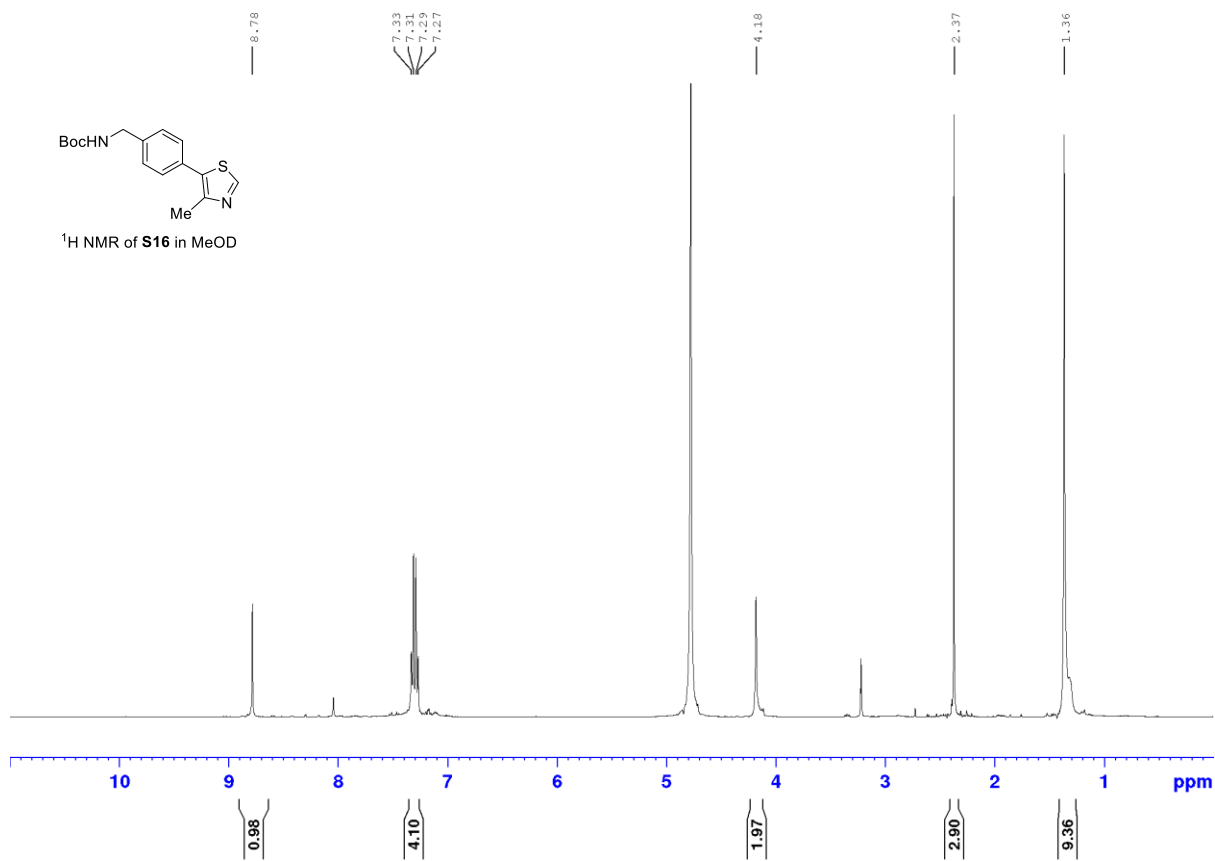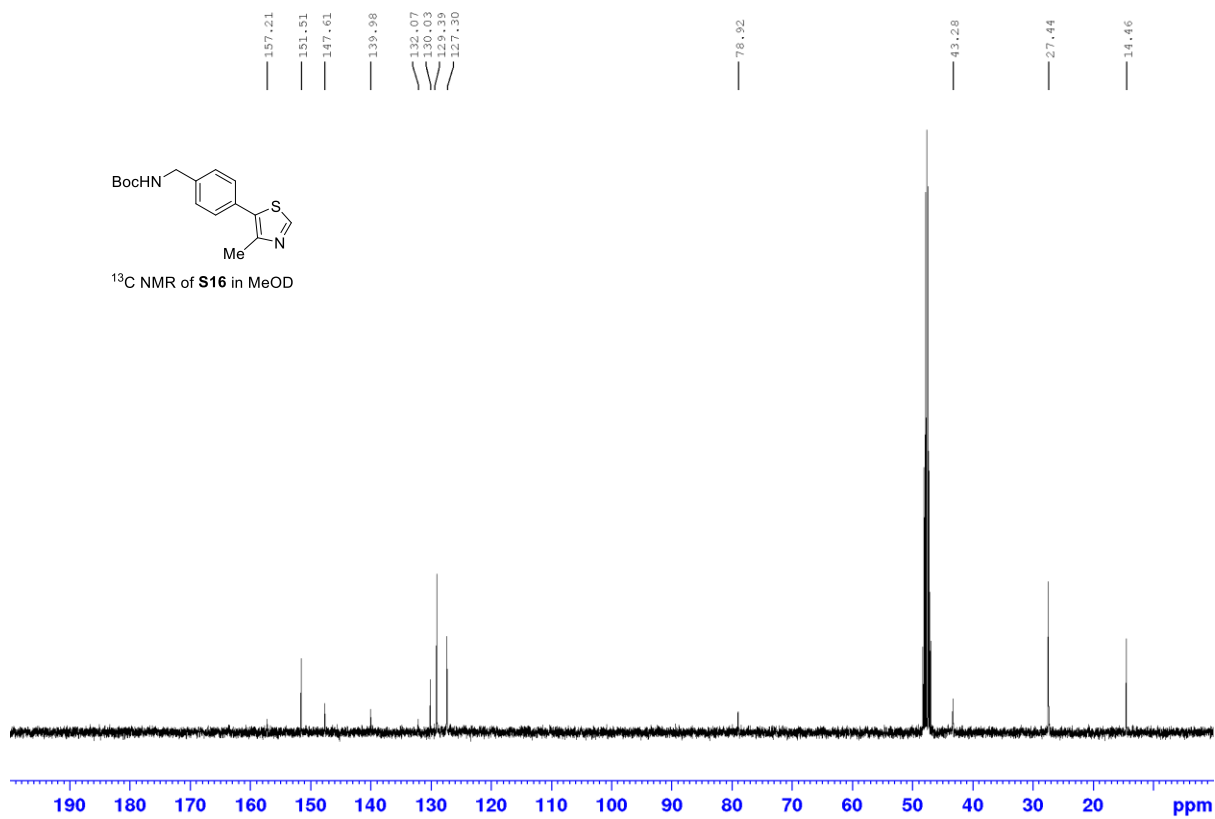

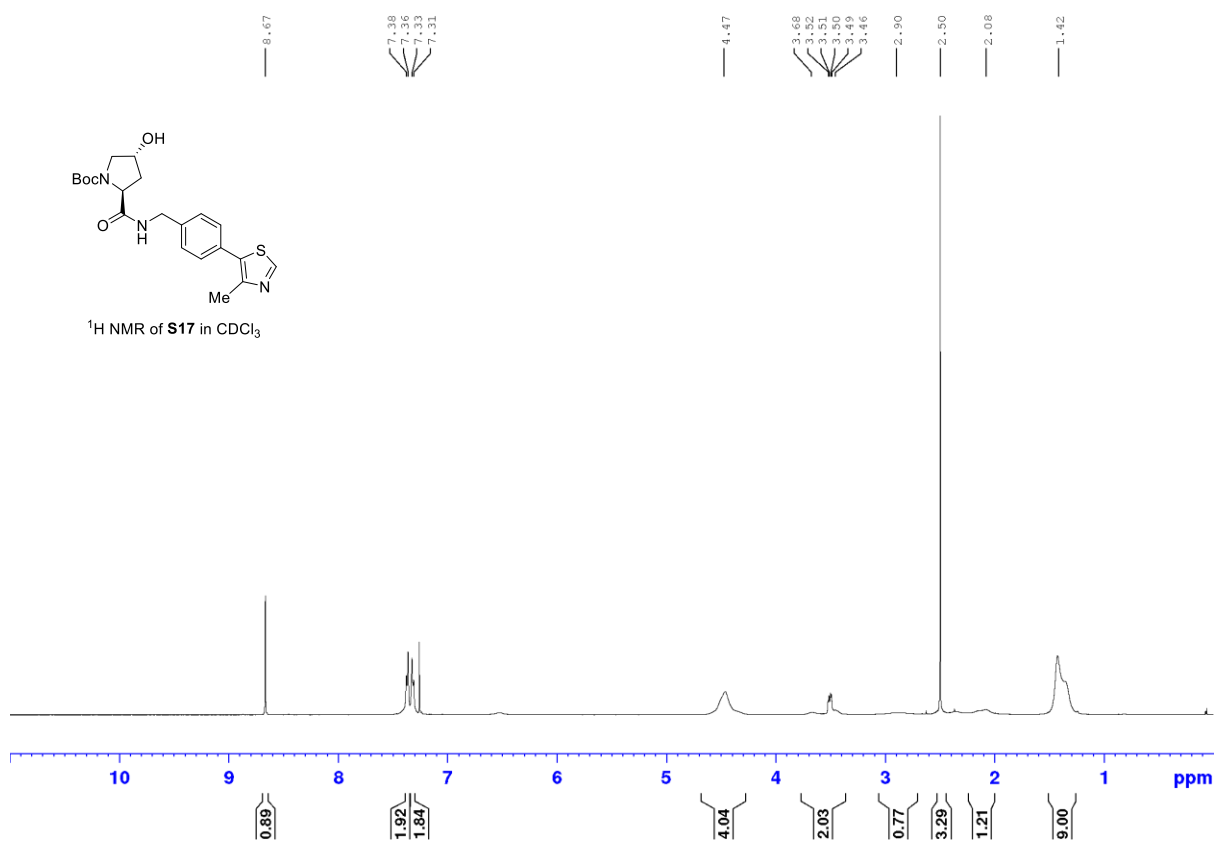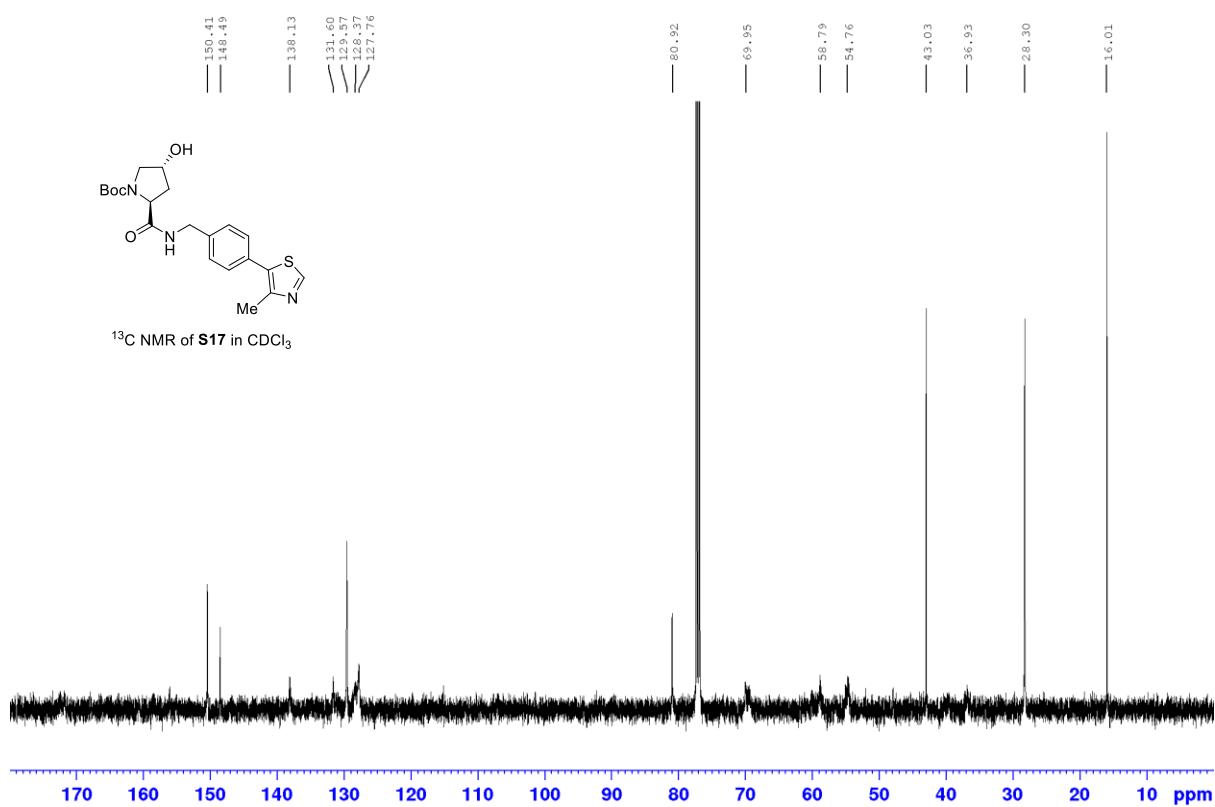

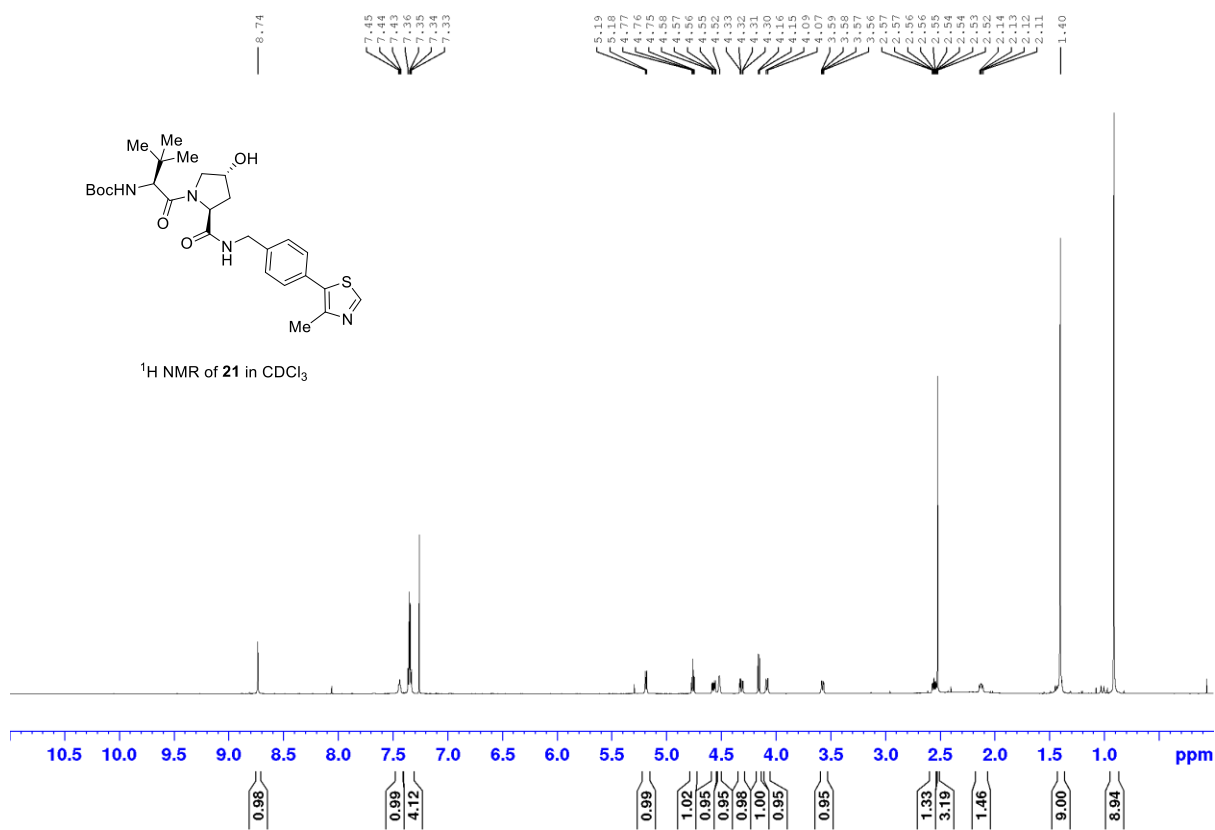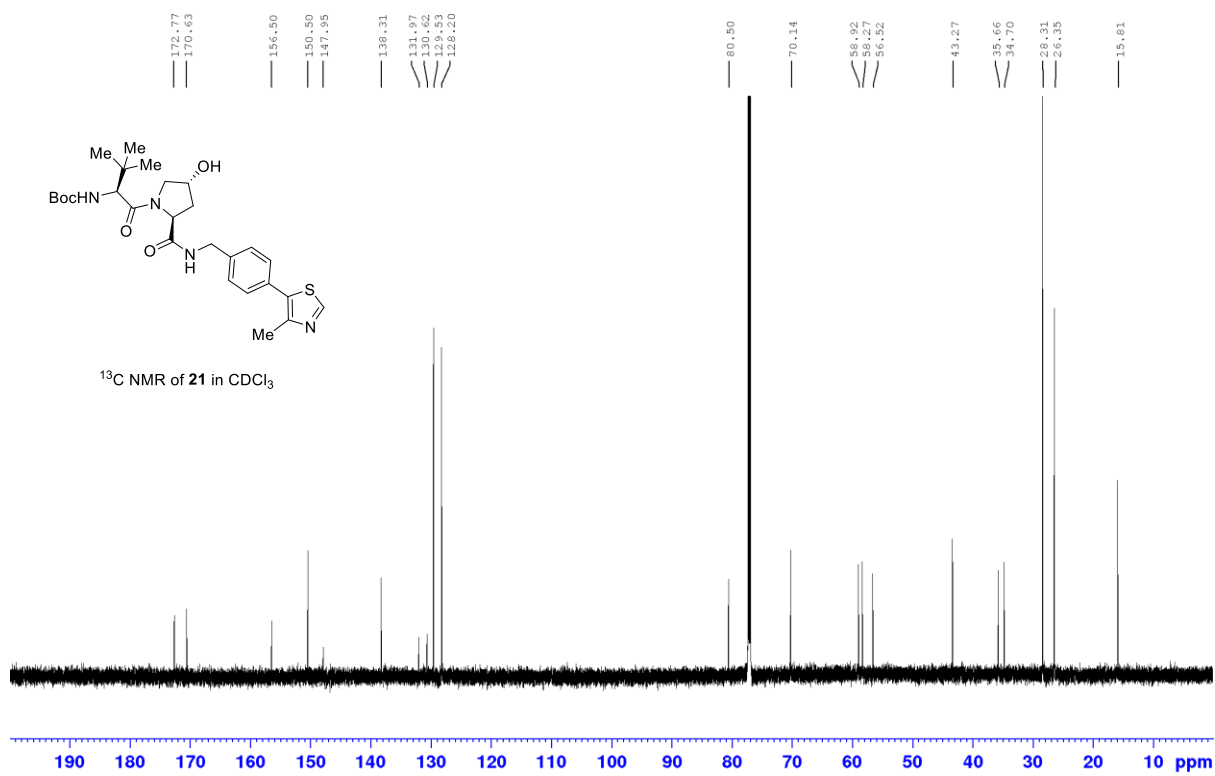

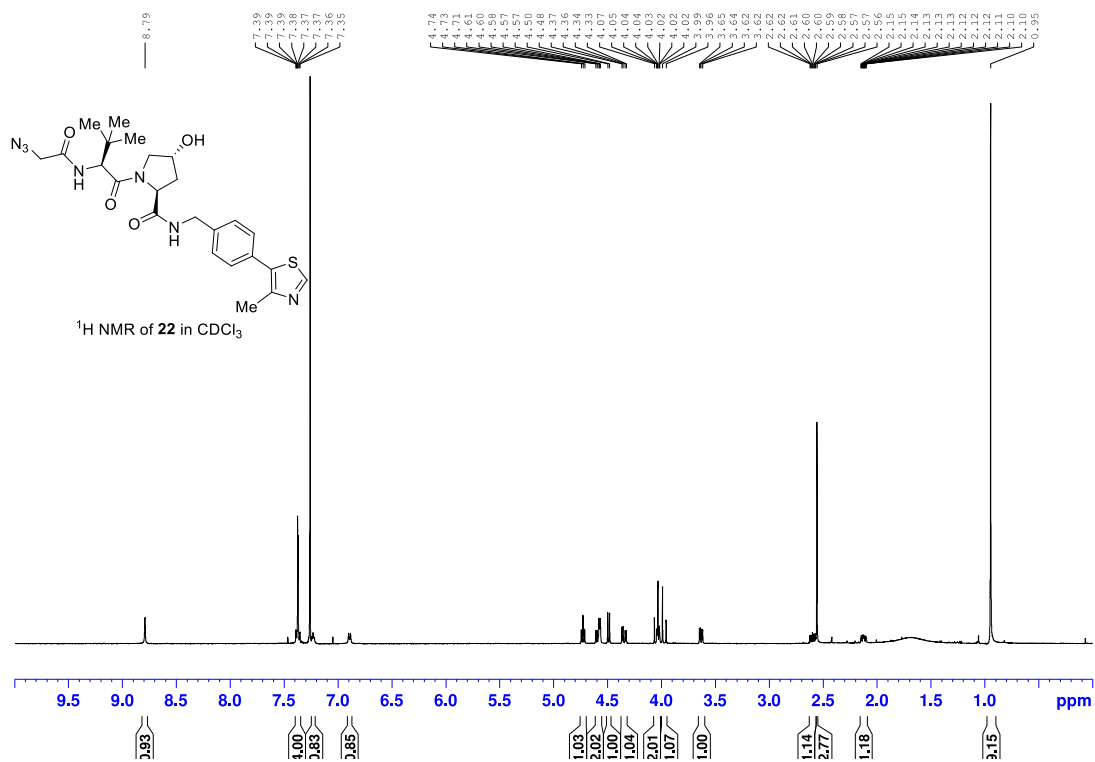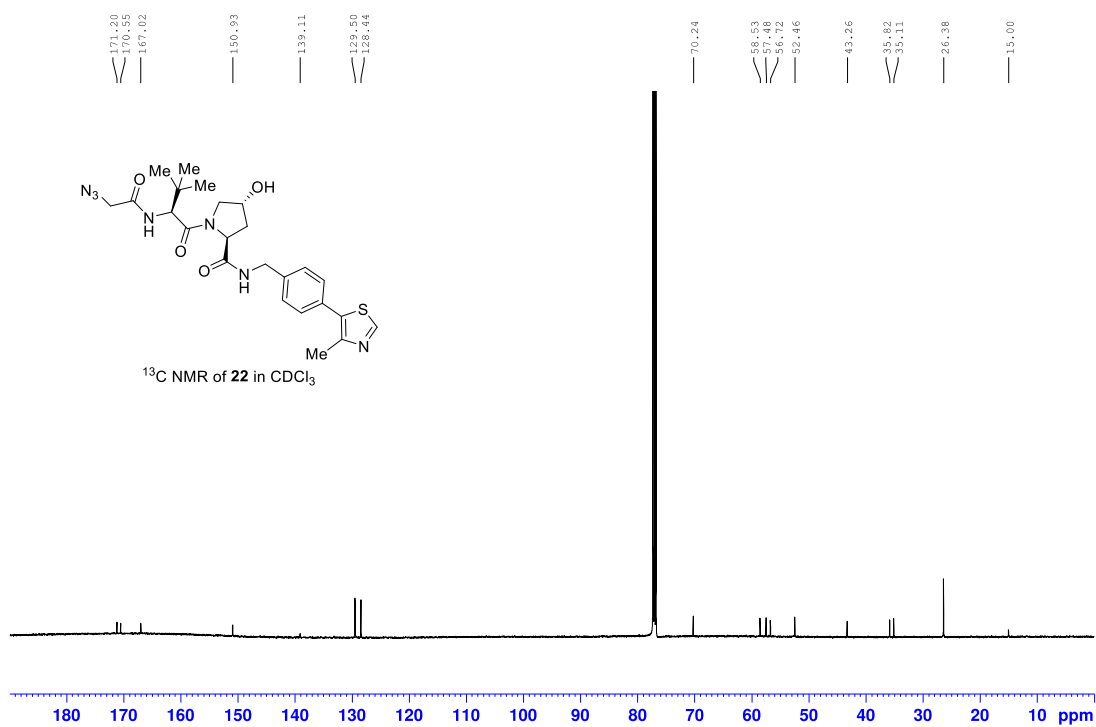

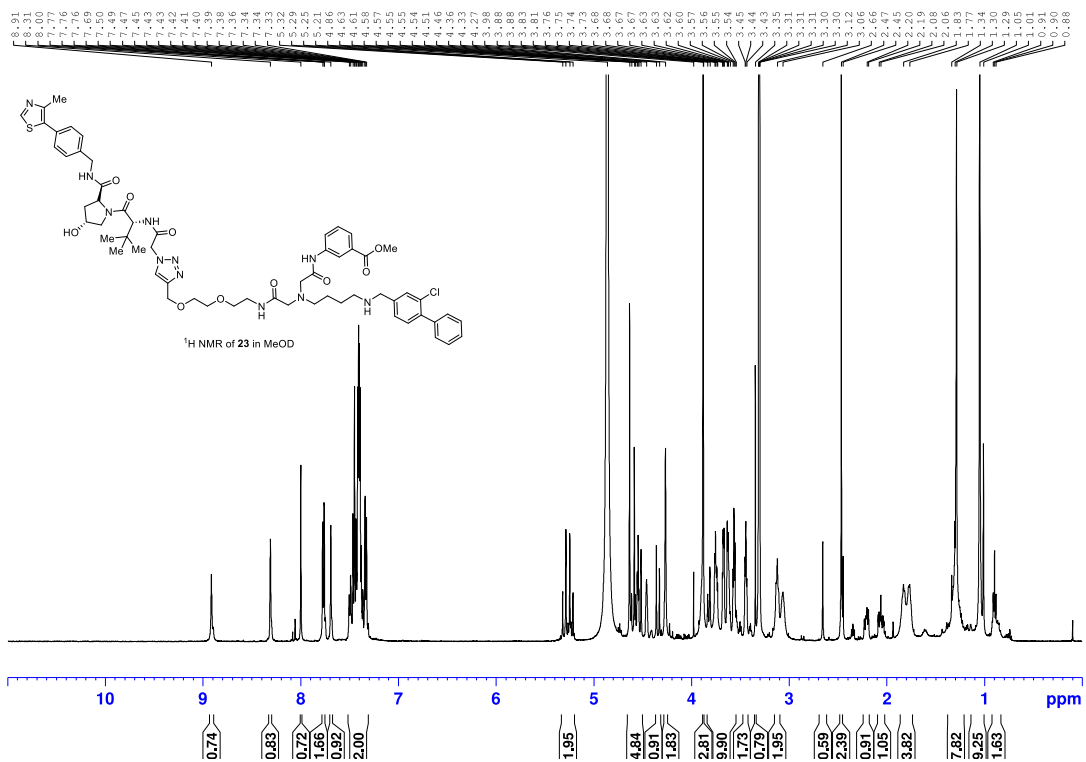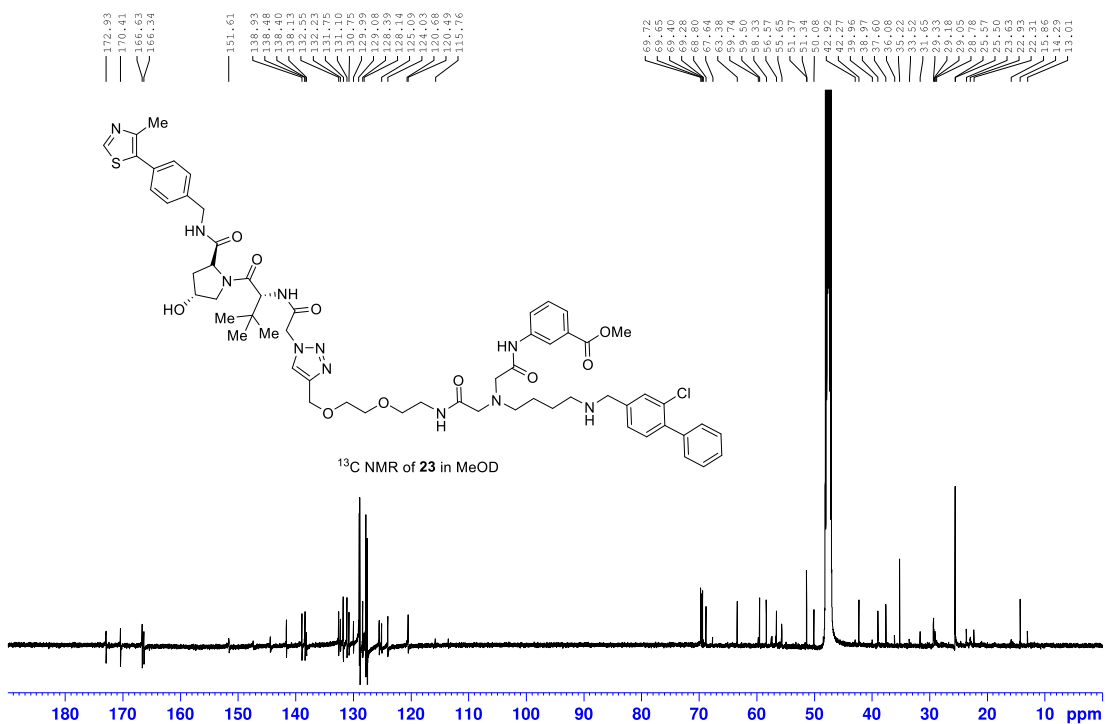

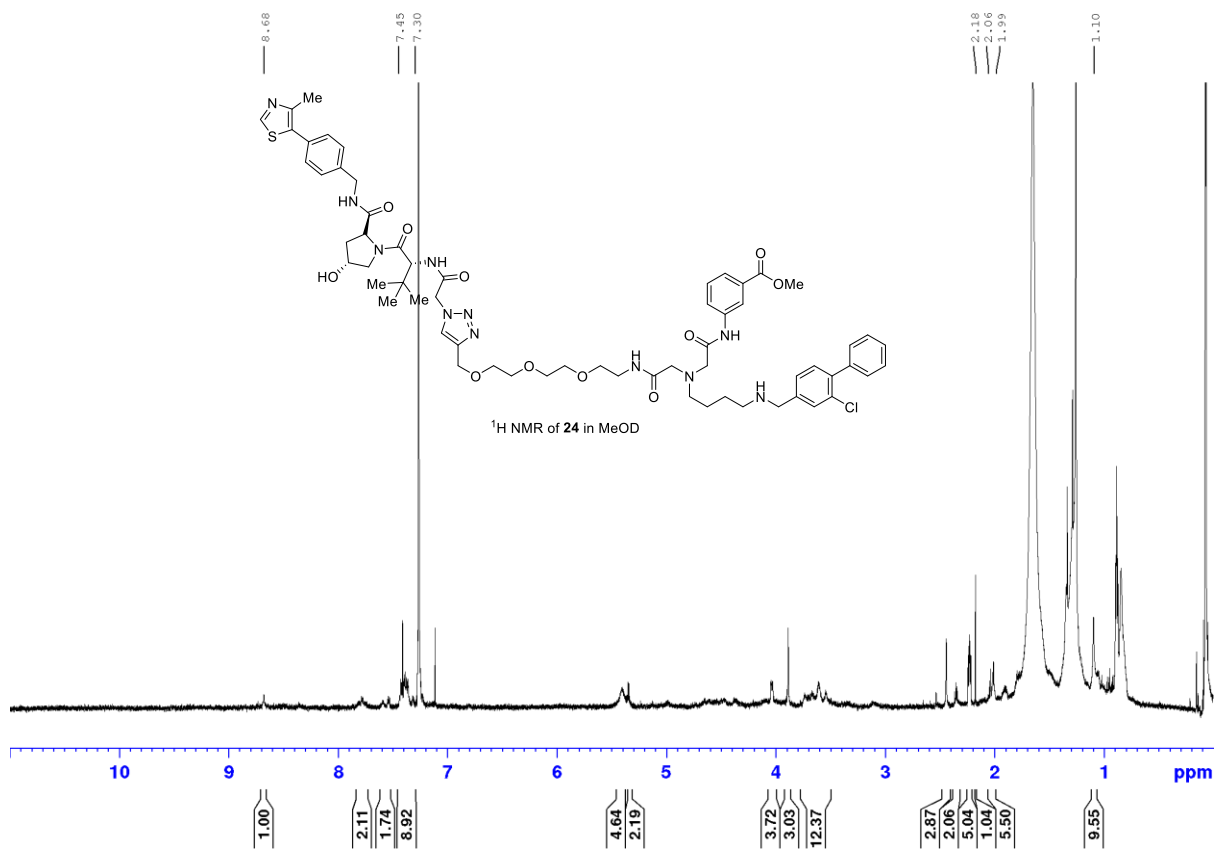

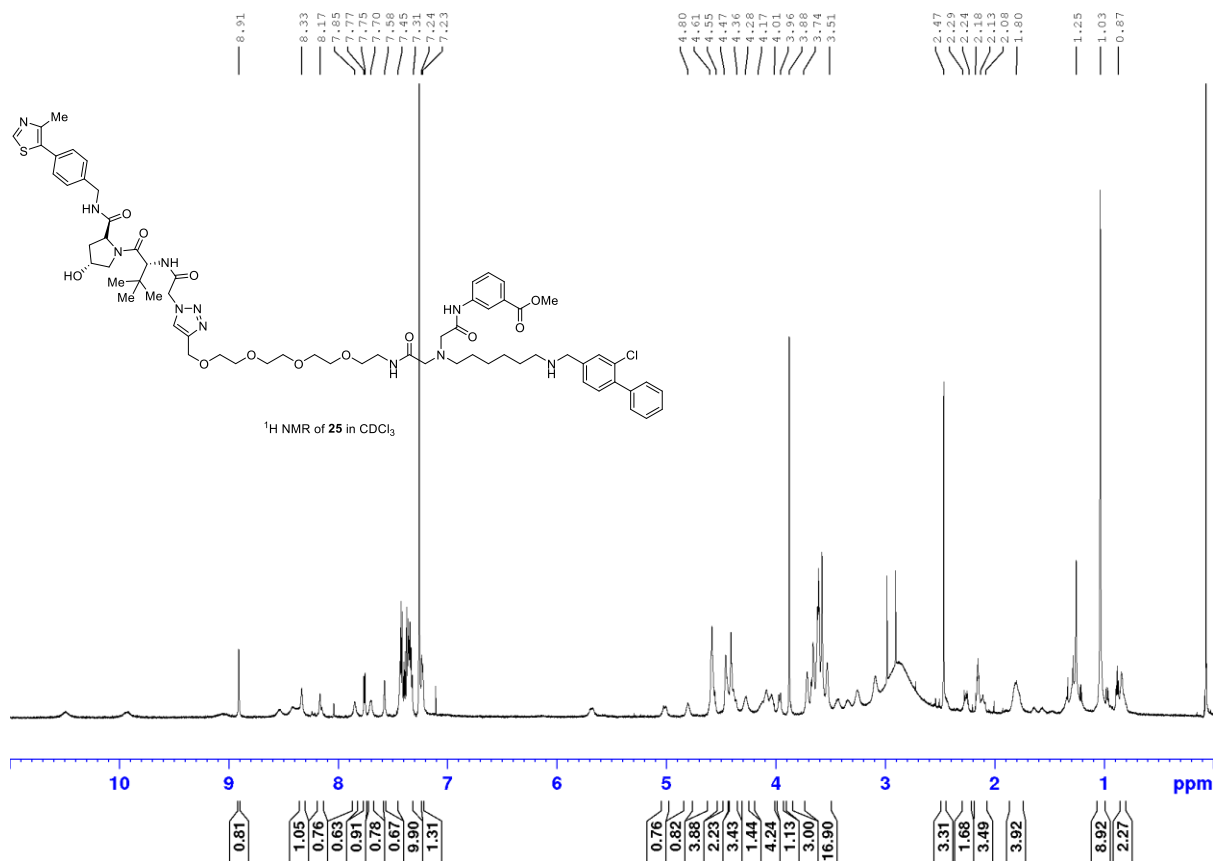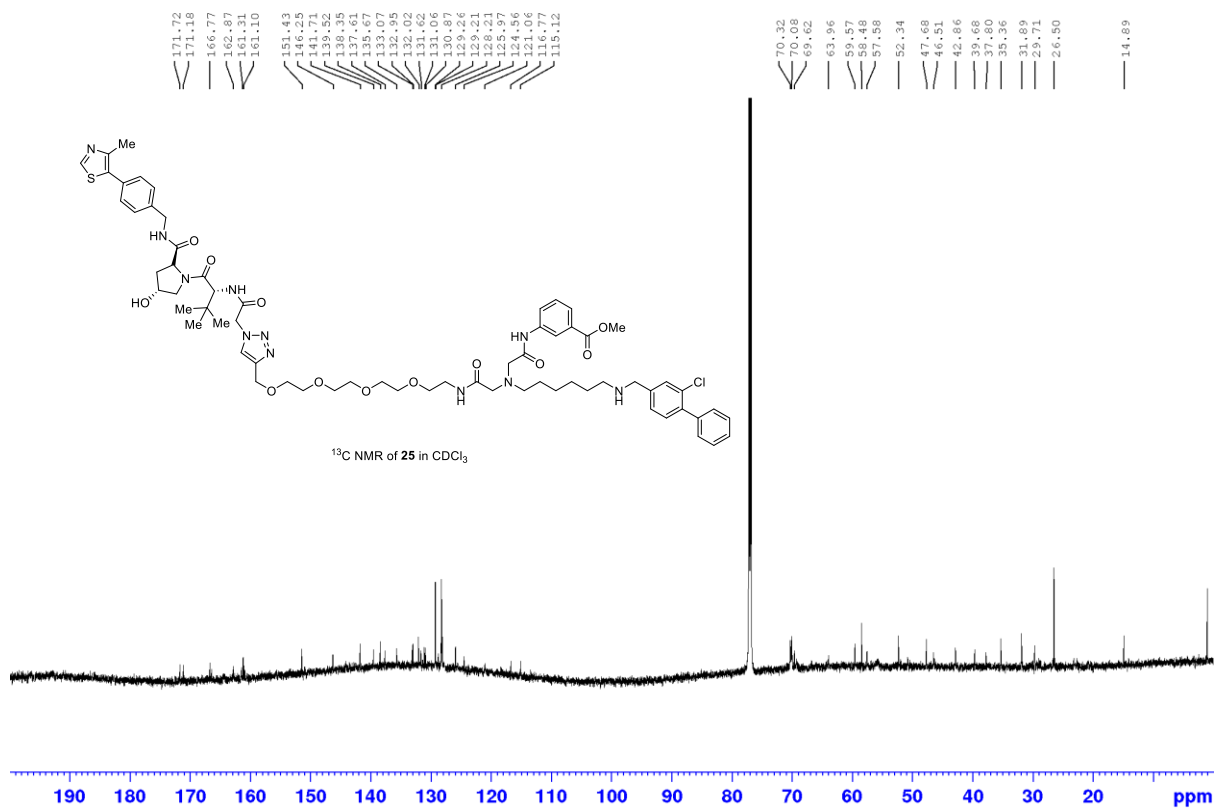

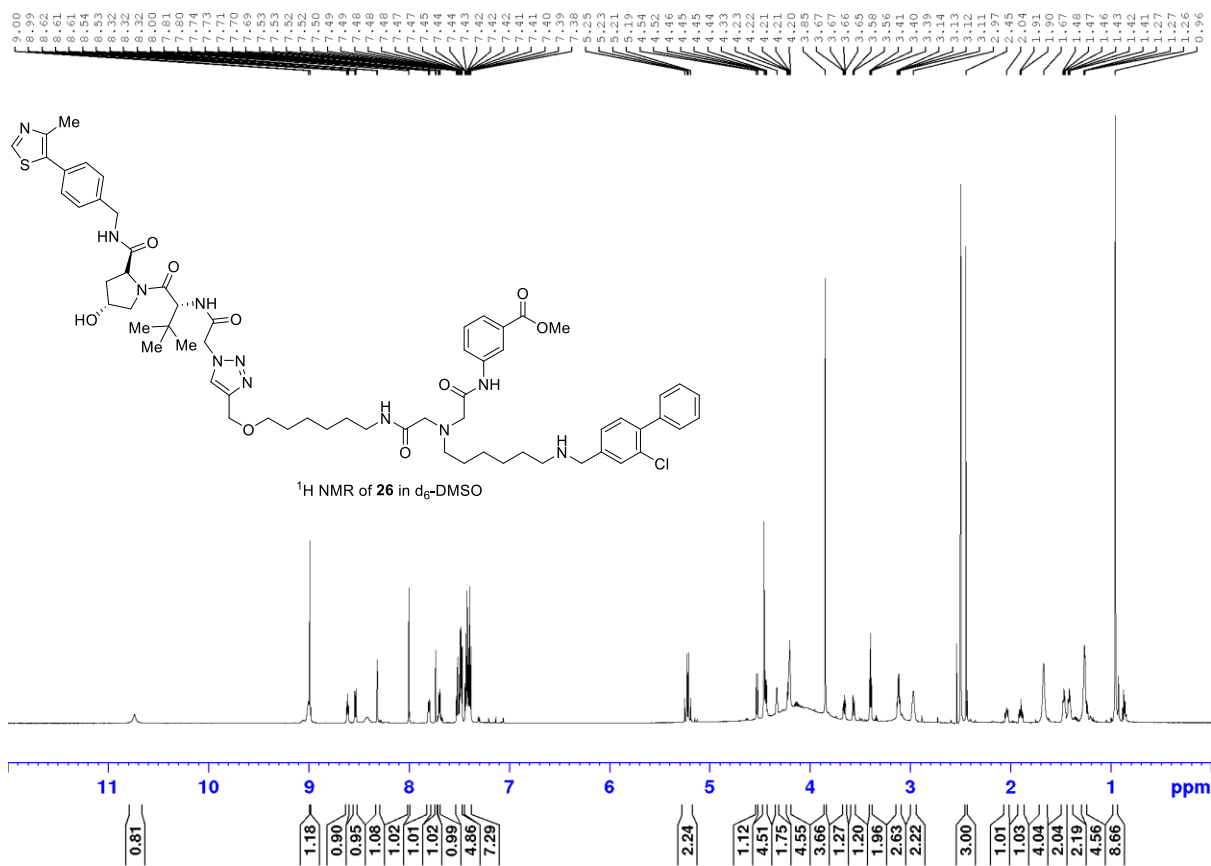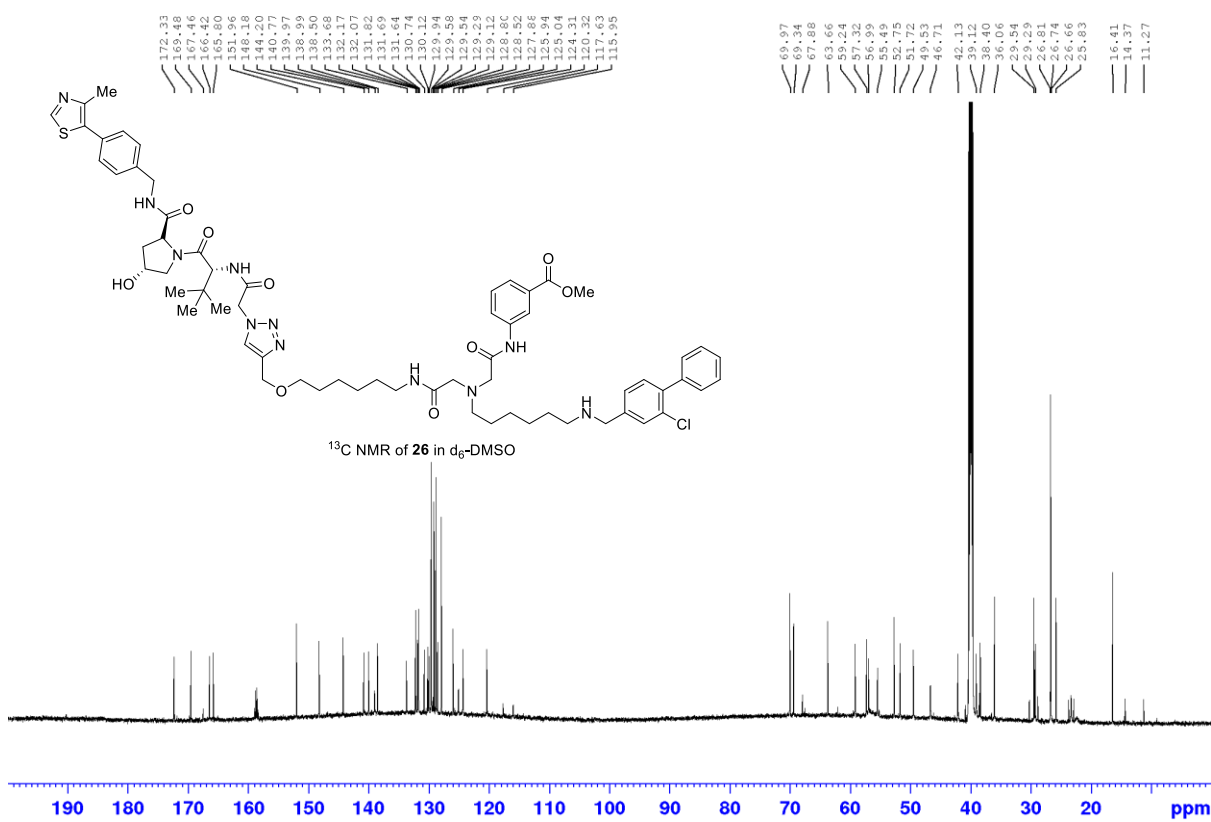

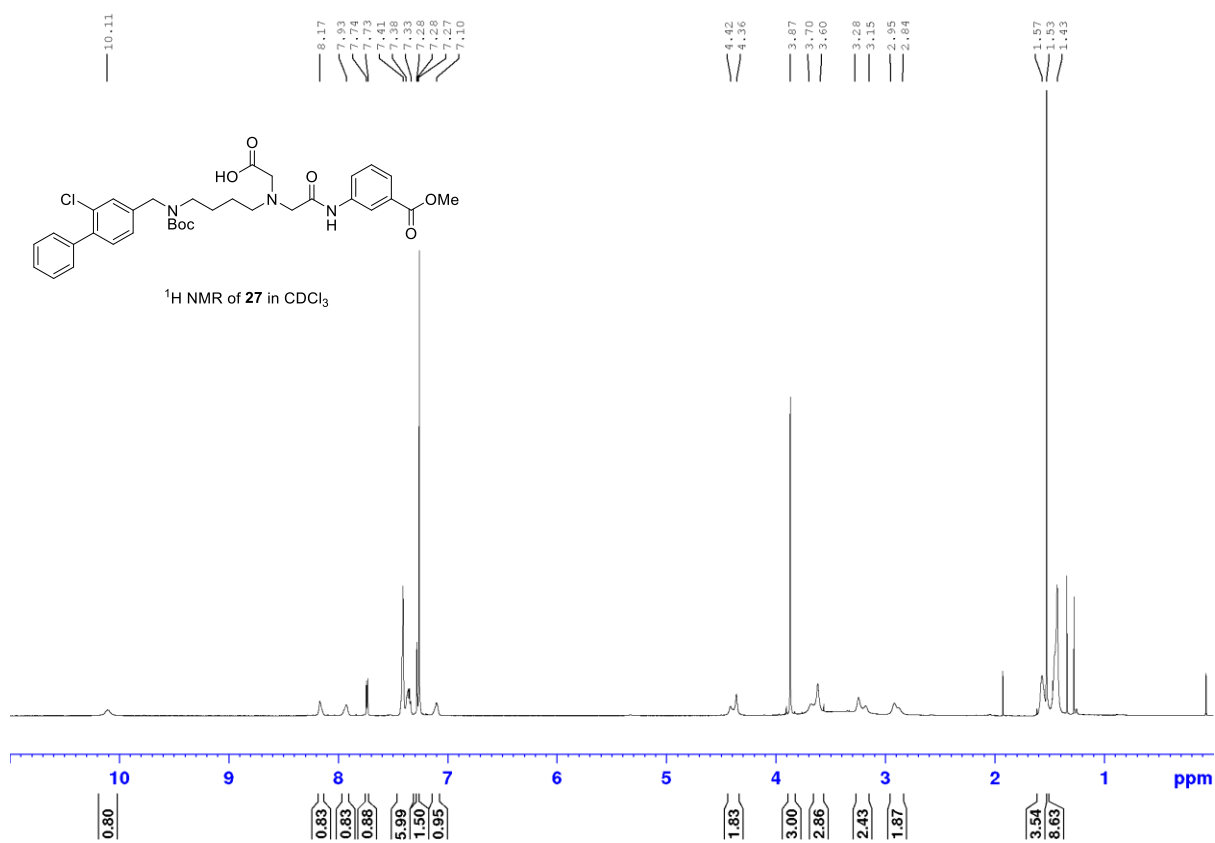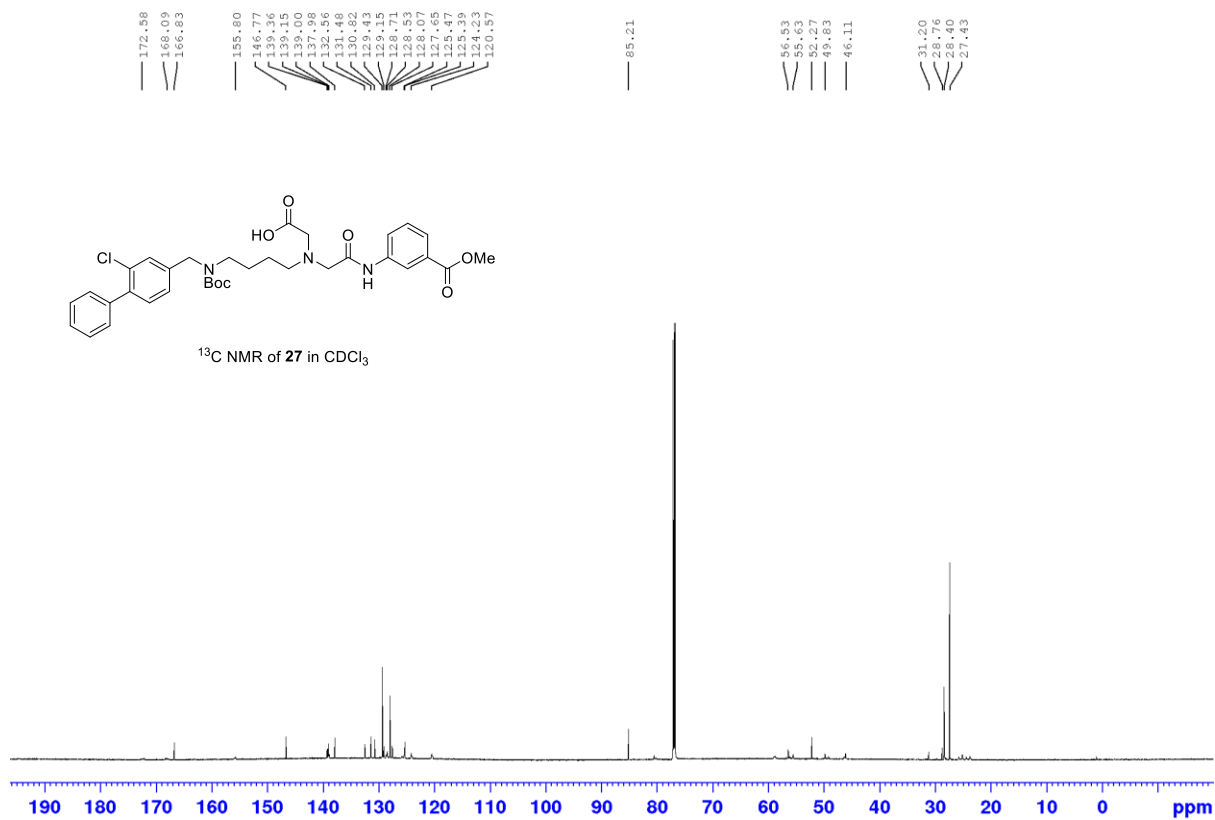

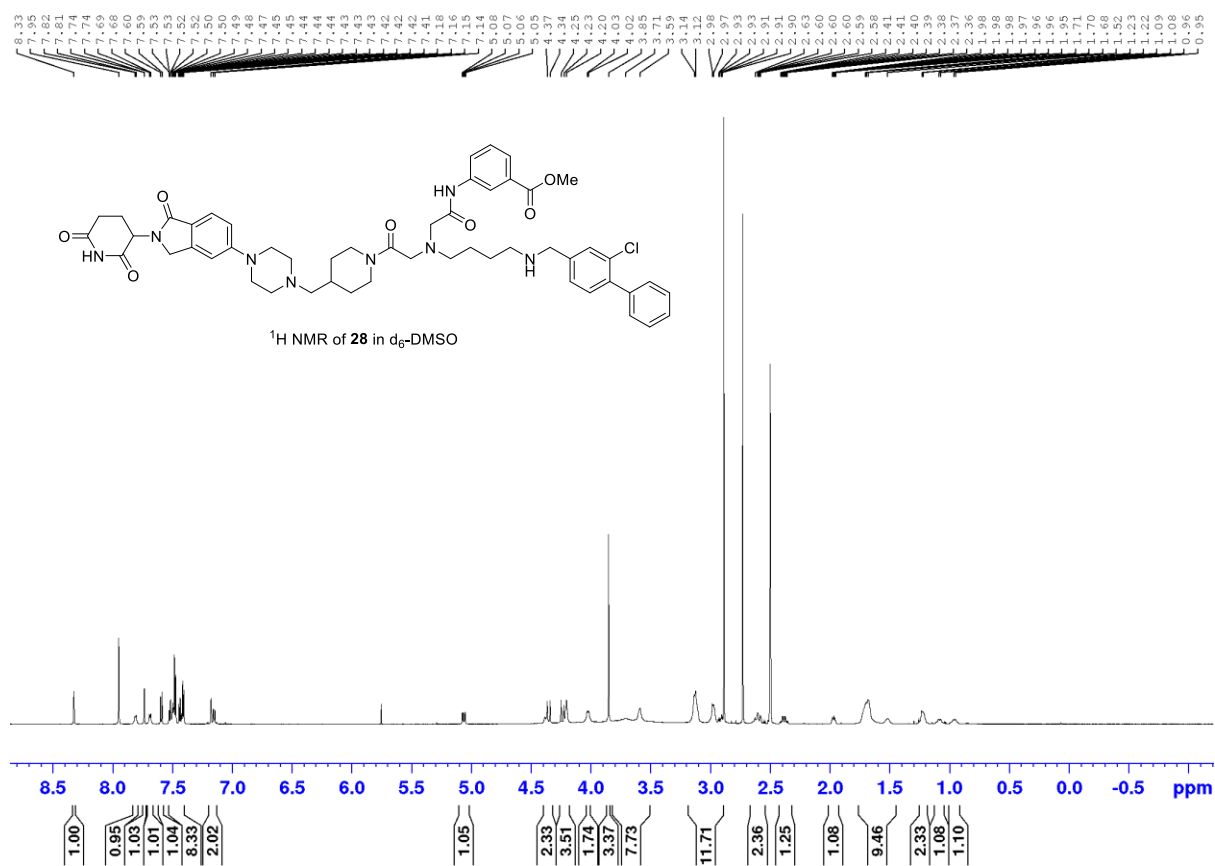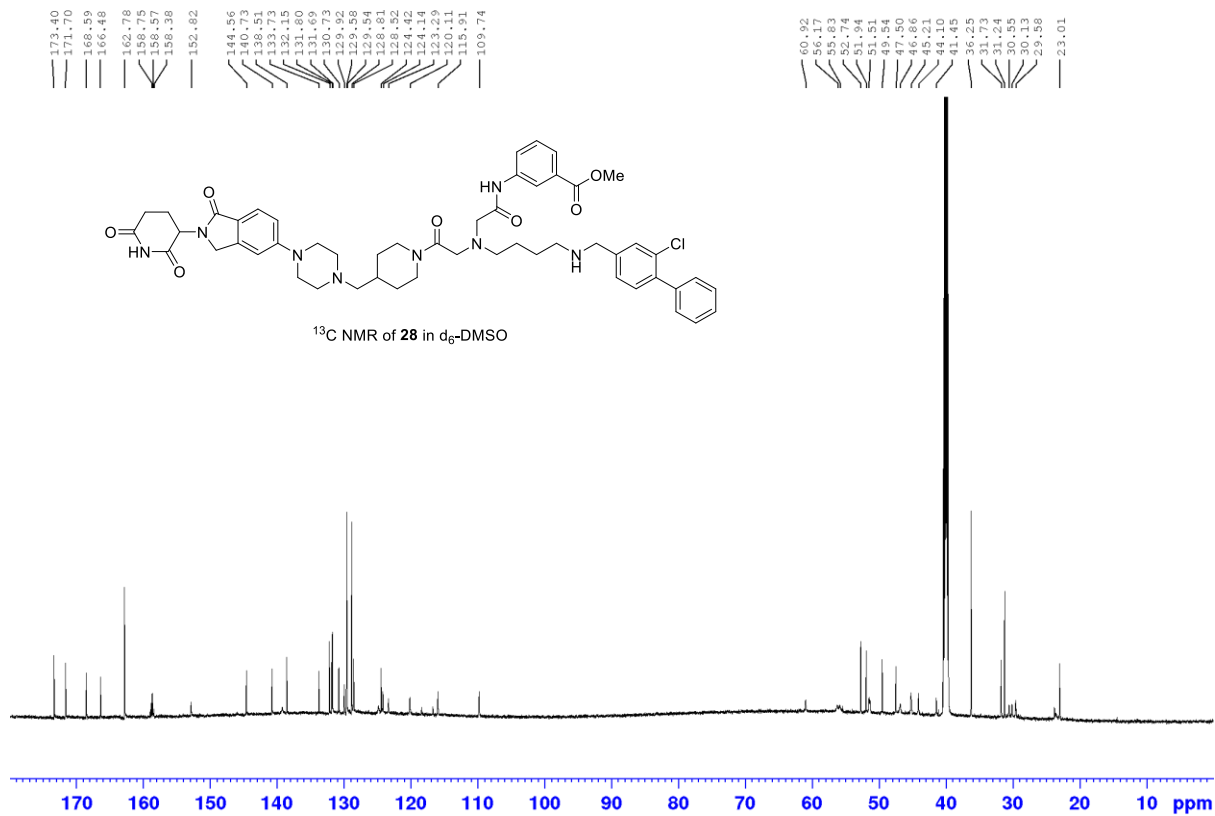

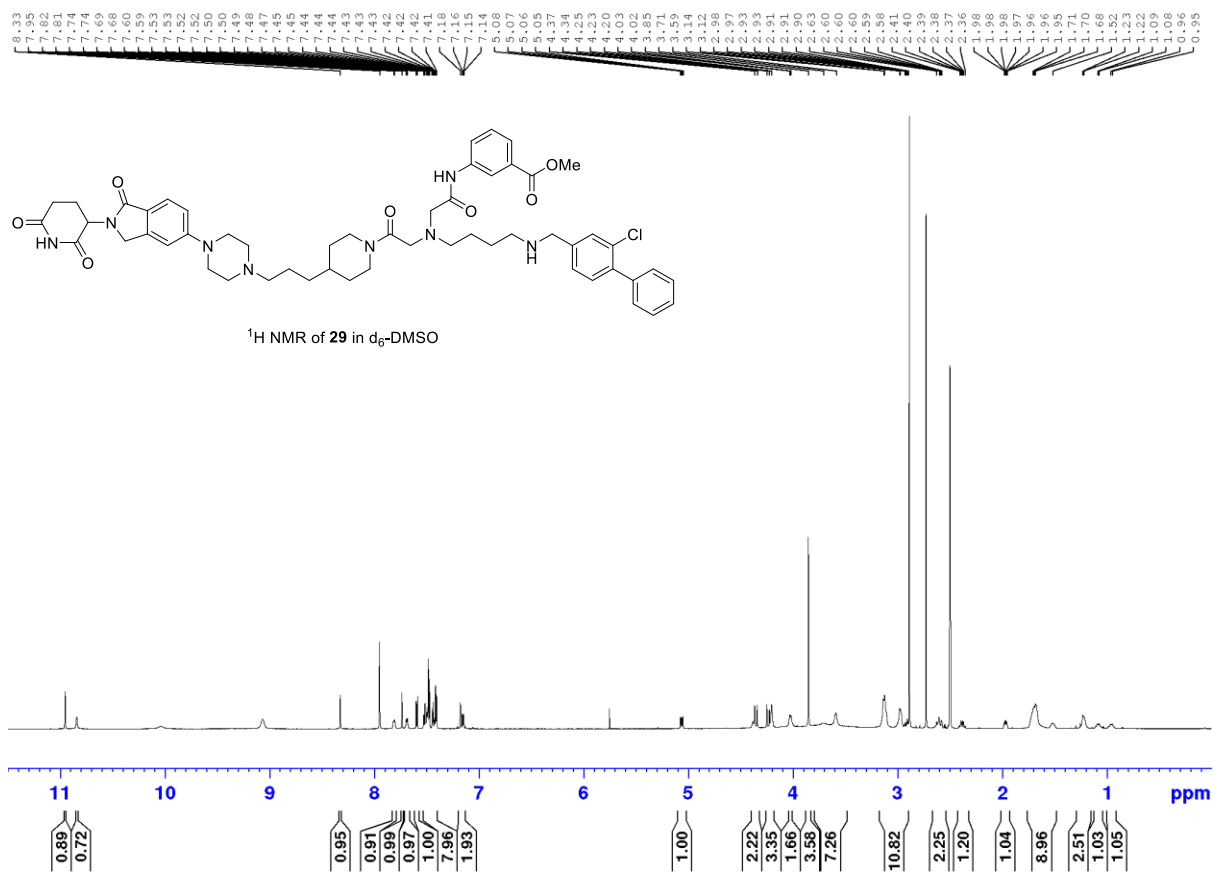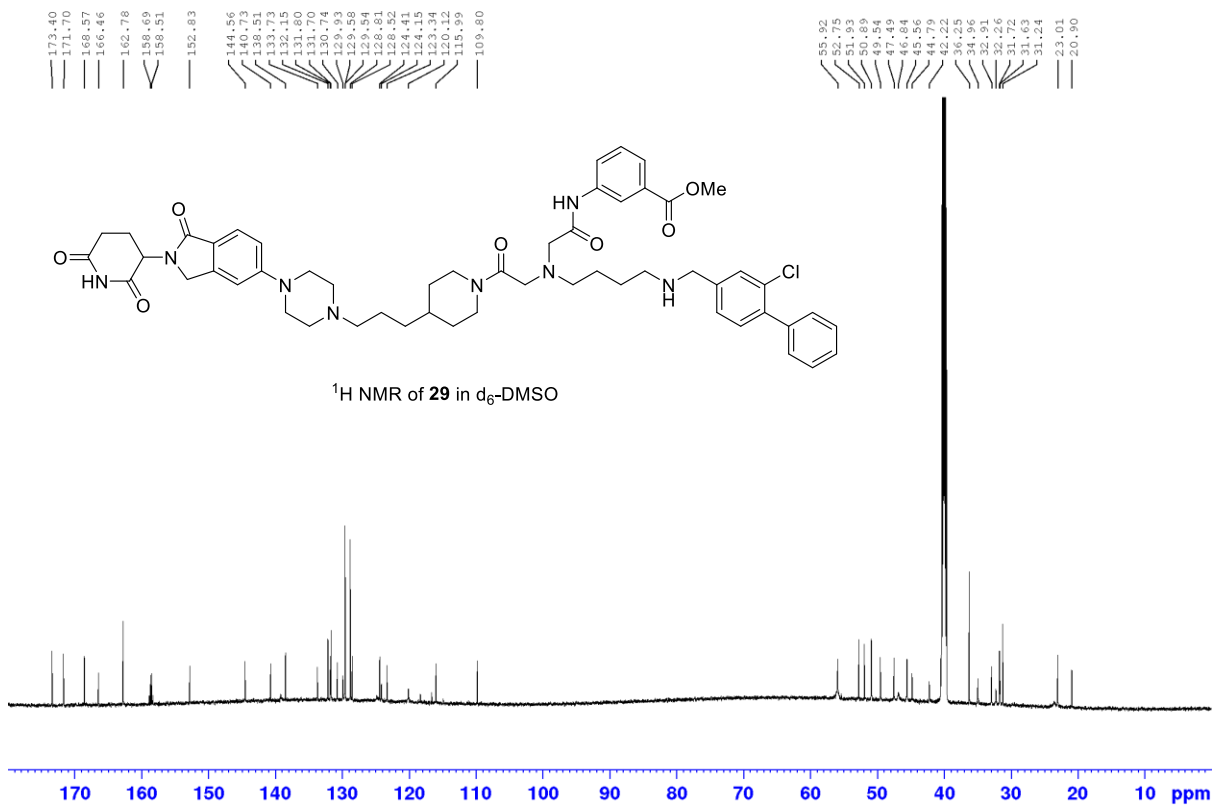

Supplement: Additional file 1 [file 1860-5397-22-47-S1.pdf]
